# Supplementary material for: Identification and Characterization of Mediators of Fluconazole Tolerance in Candida albicans
Source: Front Microbiol. 2020 Nov 11;11:591140. doi: 10.3389/fmicb.2020.591140 (PMC7686038; doi:10.3389/fmicb.2020.591140)
Supplement: Supplementary file 1 [file Data_Sheet_1.XLSX]

## Sheet: CEC clinical isolates
	Lab ID	CEC ID	OTHER NAME1	Origin	Type of infection	Clade	Reference
	NA	CEC1289	Bougn10	France	invasive	3	Bougnoux et al., 2002
	NA	CEC1424	Niger12	Niger	superficial	1	Odds et al., 2007
	NA	CEC1426	EGPURM1	France	superficial	11	Bougnoux et al., 2008
	NA	CEC1427	Bougn08	France	invasive	4	Bougnoux et al., 2002
	NA	CEC1492	AM2003-0025	unknown	unknown	4	Odds et al., 2007
	NA	CEC2018	APRURC3	France	superficial	9	Bougnoux et al., 2008
	NA	CEC2019	Niger10	Niger	superficial	12	Odds et al., 2007
	NA	CEC2020	M19	Morocco	superficial	1	Sdoudi et al., 2014
	NA	CEC2021	APRHRM2	France	invasive	2	Bougnoux et al., 2008
	NA	CEC2022	GEFrouen	France	invasive	4	Schönherr et al., 2017
	NA	CEC2023	H014	Guiana	commensal	8	Angebault et al., 2013
	NA	CEC2871	KR	S. Korea	invasive	18	NA
	NA	CEC2872	B18	S. Korea	invasive	18	Shin et al., 2011
	NA	CEC2876	A41	S. Korea	invasive	18	Shin et al., 2011
	NA	CEC3494	C63	Belgium	commensal	11	Bougnoux et al., 2006
	NA	CEC3529	B1_X	France	commensal	1	Schönherr et al., 2017
	NA	CEC3530	C1_X	France	commensal	4	Schönherr et al., 2017
	NA	CEC3531	D1_X	France	commensal	2	Schönherr et al., 2017
	NA	CEC3532	E1_X	France	commensal	4	Schönherr et al., 2017
	NA	CEC3533	F1_X	France	commensal	9	Schönherr et al., 2017
	NA	CEC3534	M20	France	commensal	1	Sdoudi et al., 2014
	NA	CEC3535	M22	France	commensal	4	Sdoudi et al., 2014
	NA	CEC3536	M23	France	commensal	4	Sdoudi et al., 2014
	NA	CEC3537	M26	France	commensal	12	Sdoudi et al., 2014
	NA	CEC3540	Bougn11	France	invasive	4	Bougnoux et al., 2002
	NA	CEC3541	Bougn14	France	invasive	4	Bougnoux et al., 2002
	NA	CEC3544	C34	France	commensal	1	Bougnoux et al., 2006
	NA	CEC3547	C74	France	commensal	11	Bougnoux et al., 2006
	NA	CEC3548	C80	France	commensal	A	Bougnoux et al., 2006
	NA	CEC3549	C82	France	commensal	2	Bougnoux et al., 2006
	NA	CEC3550	X13	France	starling	16	Bougnoux et al., 2004
	NA	CEC3551	EGPURM24	France	superficial	4	Bougnoux et al., 2008
	NA	CEC3553	C81	France	commensal	2	Bougnoux et al., 2006
	NA	CEC3554	BCHUR6	France	superficial	3	Bougnoux et al., 2008
	NA	CEC3555	Bougn9	France	invasive	4	NA
	NA	CEC3556	M45	France	commensal	4	Sdoudi et al., 2014
	NA	CEC3557	C11	France	commensal	3	Bougnoux et al., 2006
	NA	CEC3558	C39	France	commensal	2	Bougnoux et al., 2006
	NA	CEC3559	BCHUR16	France	superficial	4	Bougnoux et al., 2008
	DSY5021	CEC3560	Niger8	France	superficial	1	Odds et al., 2007
	NA	CEC3561	C71	France	commensal	11	Bougnoux et al., 2006
	NA	CEC3579	C	France	commensal	3	NA
	NA	CEC3596	Bougn7	France	invasive	3	Bougnoux et al., 2002
	NA	CEC3597	Bougn15	France	invasive	3	NA
	NA	CEC3600	X14	France	starling	16	Bougnoux et al., 2004
	NA	CEC3601	DPC78	France	commensal	11	NA
	NA	CEC3602	M52	France	commensal	4	Sdoudi et al., 2014
	NA	CEC3603	M44	France	commensal	1	Sdoudi et al., 2014
	NA	CEC3605	M42	France	commensal	1	Sdoudi et al., 2014
	NA	CEC3607	M3	France	commensal	4	Sdoudi et al., 2014
	NA	CEC3609	M9	France	commensal	1	Sdoudi et al., 2014
	NA	CEC3610	M36	France	commensal	4	Sdoudi et al., 2014
	NA	CEC3611	M43	France	commensal	4	Sdoudi et al., 2014
	NA	CEC3612	M6	France	commensal	2	NA
	NA	CEC3613	M47	France	commensal	8	Sdoudi et al., 2014
	NA	CEC3614	M7	France	commensal	2	NA
	NA	CEC3615	M46	France	commensal	2	Sdoudi et al., 2014
	NA	CEC3616	M15	France	commensal	10	Sdoudi et al., 2014
	NA	CEC3617	M40	France	commensal	1	Sdoudi et al., 2014
	NA	CEC3618	C90	France	commensal	11	Bougnoux et al., 2006
	NA	CEC3619	C87	France	commensal	NA	Bougnoux et al., 2006
	NA	CEC3622	B15	France	commensal	8	Sdoudi et al., 2014
	NA	CEC3623-3	M17	France	commensal	1	Sdoudi et al., 2014
	NA	CEC3626	C46	France	commensal	3	Bougnoux et al., 2006
	NA	CEC3627	B116	France	commensal	1	Sdoudi et al., 2014
	NA	CEC3629	HE_077	France	commensal	1	NA
	NA	CEC3631	HE_076	France	commensal	3	NA
	DSY5022	CEC3634	B54	France	commensal	8	Sdoudi et al., 2014
	DSY5023	CEC3636	M2	France	commensal	1	NA
	NA	CEC3637	Niger14	France	superficial	3	Odds et al., 2007
	DSY5024	CEC3638	C91	France	commensal	3	Bougnoux et al., 2006
	DSY5025	CEC3658	ABCURC3	France	superficial	10	NA
	DSY5026	CEC3659	ABCURRM1	France	superficial	4	Bougnoux et al., 2008
	DSY5027	CEC3660	ABCURRM3	France	superficial	1	Bougnoux et al., 2008
	DSY5028	CEC3661	ABCURRM4	France	superficial	NA	Bougnoux et al., 2008
	DSY5029	CEC3662	LRBHCRC1	France	invasive	1	Bougnoux et al., 2008
	DSY5030	CEC3663	LRBHCR2	France	invasive	NA	NA
	DSY5031	CEC3664	LRBURRM1	France	superficial	16	Bougnoux et al., 2008
	DSY5032	CEC3665	LRBURRM2	France	superficial	NA	Bougnoux et al., 2008
	DSY5033	CEC3668	TNMURR20	France	superficial	9	Bougnoux et al., 2008
	DSY5034	CEC3669	TNMURR22	France	superficial	2	Bougnoux et al., 2008
	DSY5035	CEC3671	TNMHCRC3	France	invasive	9	Bougnoux et al., 2008
	DSY5036	CEC3672	TNMHCRC4	France	invasive	1	Bougnoux et al., 2008
	DSY5037	CEC3673	SLSHCRM2	France	invasive	1	Bougnoux et al., 2008
	DSY5038	CEC3674	SLSURRM15	France	superficial	4	Bougnoux et al., 2008
	DSY5039	CEC3675	SLSHCRC2	France	invasive	4	Bougnoux et al., 2008
	DSY5040	CEC3676	SLSURRC1	France	superficial	4	Bougnoux et al., 2008
	DSY5041	CEC3678	SLSURRC14	France	superficial	1	Bougnoux et al., 2008
	DSY5042	CEC3679	SLSURRC15	France	superficial	1	Bougnoux et al., 2008
	DSY5043	CEC3680	EGPHCRC3	France	invasive	12	Bougnoux et al., 2008
	DSY5044	CEC3681	EGPHCRC4	France	invasive	3	Bougnoux et al., 2008
	DSY5045	CEC3682	EGPHCRM2	France	invasive	1	Bougnoux et al., 2008
	DSY5046	CEC3683	EGPHCRM4	France	invasive	4	NA
	DSY5047	CEC3685	EGPHCRS1	France	invasive	12	Bougnoux et al., 2008
	DSY5048	CEC3686	EGPHCRS2	France	invasive	12	Bougnoux et al., 2008
	DSY5049	CEC3704	EGPURRM9	France	superficial	11	Bougnoux et al., 2008
	DSY5050	CEC3706	EGPURRM13	France	superficial	10	Bougnoux et al., 2008
	DSY5051	CEC3707	EGPURRM15	France	superficial	D	Bougnoux et al., 2008
	DSY5052	CEC3708	EGPURRM17	France	superficial	B	Bougnoux et al., 2008
	DSY5053	CEC3711	EGPURRM25	France	superficial	10	Bougnoux et al., 2008
	DSY5054	CEC3712	SATURRM2	France	superficial	E	Bougnoux et al., 2008
	DSY5055	CEC3715	SATURRM6	France	superficial	A	Bougnoux et al., 2008
	DSY5056	CEC3716	BCHURRS3	France	superficial	4	Bougnoux et al., 2008
	DSY5057	CEC3786	E9	France	invasive	18	Shin et al., 2011
	DSY5058	CEC4032	313	France	superficial	1	Ropars et al., 2018
	DSY5059	CEC4035	316	France	superficial	1	Ropars et al., 2018
	DSY5060	CEC4038	321	France	superficial	NA	Ropars et al., 2018
	DSY5061	CEC4039	322	France	superficial	NA	Ropars et al., 2018
	DSY5062	CEC4103	CAAF1	France	superficial	13	Dieng et al., 2012
	DSY5063	CEC4104	CAAF2	France	superficial	13	Dieng et al., 2012
	DSY5064	CEC4106	CAAL134	France	superficial	1	Dieng et al., 2012
	DSY5065	CEC4107	CAAL135	France	superficial	1	Dieng et al., 2012
	DSY5066	CEC4108	CAAL136	France	superficial	1	Dieng et al., 2012
	NA	CEC4217	A2_X	France	commensal	1	NA
	NA	CEC4218	H2_X	France	commensal	1	NA
	DSY5067	CEC4254	CHV1	France	invasive	B	Garnaud et al., 2015
	DSY5068	CEC4256	FON1	France	superficial	1	Garnaud et al., 2015
	DSY5069	CEC4259	MAC1	France	invasive	1	Garnaud et al., 2015
	DSY5070	CEC4261	SOU2	France	superficial	9	Garnaud et al., 2015
	DSY5071	CEC4479	DW1/1402025	France	food spoilage	1	Ropars et al., 2018
	DSY5072	CEC4480	DW2/1469060	France	food spoilage	1	Ropars et al., 2018
	DSY5073	CEC4481	DW3/1477042	France	food spoilage	NA	Ropars et al., 2018
	DSY5074	CEC4482	DW4/1485394	France	food spoilage	2	Ropars et al., 2018
	DSY5077	CEC4485	DW7/1488194	France	food spoilage	NA	Ropars et al., 2018
	DSY5076	CEC4486	DW8/1494622	France	food spoilage	E	Ropars et al., 2018
	DSY5078	CEC4487	DW9/1500439	France	food spoilage	2	Ropars et al., 2018
	DSY5079	CEC4488	DW10/1500695	France	food spoilage	1	Ropars et al., 2018
	DSY5080	CEC4489	DW11/1501347	France	food spoilage	1	Ropars et al., 2018
	DSY5081	CEC4492	DW14/1516808	France	food spoilage	11	Ropars et al., 2018
	DSY5082	CEC4493	DW15/6600247	France	food spoilage	2	Ropars et al., 2018
	DSY5085	CEC4496	DW18/6534062	France	food spoilage	1	Ropars et al., 2018
	DSY5086	CEC4497	DW19/6688002	France	food spoilage	4	Ropars et al., 2018
	DSY5087	CEC4498	DW20/6706679	France	food spoilage	D	Ropars et al., 2018
	DSY5088	CEC4499	DW21/6806684	France	food spoilage	1	Ropars et al., 2018
	DSY5089	CEC4500	DW22/6868847	France	food spoilage	1	Ropars et al., 2018
	NA	CEC4501	BEYH08	France	superficial	16	NA
	NA	CEC4502	BEYM05	France	superficial	NA	NA
	NA	CEC4503	BLOG-CMC patient3	France	superficial	11	NA
	NA	CEC4509	Blov53-CMC patient	France	superficial	11	NA
	NA	CEC4514	BOIN06-CMC patient5	France	superficial	1	NA
	NA	CEC4520	FLOL-CMC patient6	France	superficial	11	NA
	NA	CEC4525	FLON07	France	superficial	NA	Ropars et al., 2018
	NA	CEC4526	FOFF33	France	superficial	4	NA
	NA	CEC4528	HAME10	France	superficial	11	NA
	NA	CEC4549	ARIS6-CMC patient	France	superficial	4	NA
	DSY5090	CEC704	POU	France	superficial	4	Ropars et al., 2018
	DSY5092	CEC708	GOL	France	superficial	4	Ropars et al., 2018
	DSY5091	CEC709	BOU	France	superficial	3	Ropars et al., 2018
	DSY5093	CEC711	TAH	France	superficial	4	Ropars et al., 2018
	DSY5094	CEC712	ARS	France	superficial	4	Ropars et al., 2018
	DSY5095	CEC716	BON	France	superficial	12	Ropars et al., 2018
	DSY5096	CEC718	MAN-718	France	superficial	1	NA
	DSY5097	CEC723	HAM	France	superficial	NA	Ropars et al., 2018
	References
	Bougnoux M-E, Morand S, d'Enfert C. Usefulness of multilocus sequence typing for characterization of clinical isolates of Candida albicans. Journal of Clinical Microbiology (2002) 40(4):1290-7. PubMed PMID: 11923347.
	Bougnoux M-E, Pujol C, Diogo D, Bouchier C, Soll DR, D'enfert C. Mating is rare within as well as between clades of the human pathogen Candida albicans. Fungal Genet Biol (2008) 45(3):221-31. doi: 10.1016/j.fgb.2007.10.008
	Bougnoux M-E, Aanensen DM, Morand S, Théraud M, Spratt BG, D&apos;enfert C. Multilocus sequence typing of Candida albicans: strategies, data exchange and applications. Infection, genetics and evolution : journal of molecular epidemiology and evolutionary genetics in infectious diseases (2004) 4(3):243-52.
	Bougnoux M-E, Morand S, d'Enfert C. Usefulness of multilocus sequence typing for characterization of clinical isolates of Candida albicans. Journal of Clinical Microbiology (2002) 40(4):1290-7.
	Odds FC, Bougnoux M-E, Shaw DJ, Bain JM, Davidson AD, Diogo D, et al. Molecular phylogenetics of Candida albicans. Eukaryot Cell (2007) 6(6):1041-52. doi: 10.1128/EC.00041-07.
	Sdoudi K, Bougnoux M-E, El Hamoumi R, Diogo D, El Mdaghri N, D&apos;Enfert C, et al. Phylogeny and diversity of candida albicans vaginal isolates from three continents. Int J Current Microbiol and Appl Sciences 3(7):471-80.
	Schönherr FA, Sparber F, Kirchner FR, Guiducci E, Trautwein-Weidner K, Gladiator A, et al. The intraspecies diversity of C. albicans triggers qualitatively and temporally distinct host responses that determine the balance between commensalism and pathogenicity. Mucosal Immunol (2017) 85:pii: e0080.
	Angebault C, Djossou F, Abélanet S, Permal E, Ben Soltana M, Diancourt L, et al. Candida albicans Is Not Always the Preferential Yeast Colonizing Humans: A Study in Wayampi Amerindians. The Journal of Infectious Diseases (2013) 208(10):1705-16
	Shin JH, Bougnoux M-E, d'Enfert C, Kim SH, Moon C-J, Joo MY, et al. Genetic Diversity among Korean Candida albicans Bloodstream Isolates: Assessment by Mutilocus Sequence Typing and Restriction Endonuclease Analysis of Genomic DNA using BssHII. Journal of Clinical Microbiology (2011) 49(7):2572-7
	Ropars J, Maufrais C, Diogo D, Marcet-Houben M, Perin A, Sertour N, et al. Gene flow contributes to diversification of the major fungal pathogen Candida albicans. Nat Commun (2018) 9(1):2253. Epub 2018/06/10
	Dieng Y, Sow D, Ndiaye M, Guichet E, Faye B, Tine R, et al. Identification de trois souches de Candida africana au Sénégal. Journal de Mycologie Médicale (2012) 22(4):335-40
	Garnaud C, Botterel F, Sertour N, Bougnoux M-E, Dannaoui É, Larrat S, et al. Next-generation sequencing offers new insights into the resistance of Candida spp. to echinocandins and azoles. Journal of Antimicrobial Chemotherapy (2015) 70(9):2556-65

## Sheet: DSY clinical isolates
Lab ID	Alternative ID	FLC MIC	Comments	Clade	Reference
		(µg/ml)
DSY486	SC5314	NA1	wild type laboratory strain	NA	Fonzi et al (1993)
DSY2102	572-10	2	Low-High phenotype2	NA	Marr et al (1999)
DSY2103	578-8	2	Low-High phenotype	NA	Marr et al (1999)
DSY2104	623-11	2	Low-High phenotype	NA	Marr et al (1999)
DSY2105	630-20	2	Low-High phenotype	NA	Marr et al (1999)
DSY2106	630-11	2	Low-High phenotype	NA	Marr et al (1999)
DSY2107	707-15	0.5	Low-High phenotype	NA	Marr et al (1999)
DSY2108	34-023-096	1	Low-High phenotype	NA	Marr et al (1999)
DSY2109	34-504-040	2	Low-High phenotype	NA	Marr et al (1999)
DSY2110	34-028-117	1	Low-High phenotype	NA	Marr et al (1999)
DSY4452	1101-3343	NA	Isolated from an endocarditis patient	11	This study
DSY4453	1052-9203	NA	Isolated from an endocarditis patient	11	This study
DSY4454	0526-60203	NA	Isolated from an endocarditis patient	11	This study
DSY4585	12 1206 15653	NA	Isolated from an endocarditis patient	11	This study
DSY4586	12 1211 22503	NA	Isolated from an endocarditis patient	11	This study
DSY4587	13 0411 12193	NA	Isolated from an endocarditis patient	11	This study
DSY4588	13 0420 06733	NA	Isolated from an endocarditis patient	11	This study
DSY4751	SSI 1489	0.25	"WT"4	NA	This study
DSY4752	SSI 2503	> 128	Resistant4	NA	This study
DSY4754	SSI 4622	0.125	Weak Trailing4	NA	(Astvad et al (2017)
DSY4758	SSI 5579	> 128	Heavy trailing4	NA	(Astvad et al (2017)
DSY4759	SSI 6028	0.25	Medium trailing4	NA	This study
DSY4806	SSI 3407	> 128	NA	NA	This study
DSY4807	SSI 3408	0.25	NA	NA	This study
DSY4808	SSI 5053	0.25	NA	NA	This study
DSY4810	SSI 6037	0.25	NA	NA	This study
1Not Applicable/Not Available
2As described by Marr et al. {Marr, 1999, The Trailing End Point Phenotype in Antifungal Susceptibility Testing Is pH Dependent}
3Boldfaced-underlined number indicate the year of sampling as 20xx
4Information from M.C. Arendrup, WT = wild type
References
Fonzi W, Irwin M. Isogenic strain construction and gene mapping in Candida albicans. Genetics(1993). p. 717-28
Marr KA, Rustad TR, Rex JH, White TC. The Trailing End Point Phenotype in Antifungal Susceptibility Testing Is pH Dependent. Antimicrobial Agents and Chemotherapy(1999). p. 1383-6
Astvad KMTT, Johansen HK, Røder BL, Rosenvinge FS, Knudsen JD, Lemming L, et al. Update from a 12-Year Nationwide Fungemia Surveillance: Increasing Intrinsic and Acquired Resistance Causes Concern. Journal of Clinical Microbiology(2017). p. 1-15

## Sheet: Results TI assay
			TI pH 7.5						pH 7						pH 6						pH 4.5
	Lab ID	CEC ID	Replicate A11	Replicate A21	Replicate B11	Replicate B21	Mean	Std Dev2	Replicate A1	Replicate A2	Replicate B1	Replicate B2	Mean	Std Dev	Replicate A1	Replicate A2	Replicate B1	Replicate B2	Mean	Std Dev	Replicate A1	Replicate A2	Replicate B1	Replicate B2	Mean	Std Dev
	NA	CEC1289	0.33	0.34	0.18	0.19	0.26	0.0867948	0.21	0.21	0.23	0.23	0.22	0.011547	0.22	0.22	0.3	0.29	0.2575	0.0434933	0.49	0.45	0.58	0.57	0.5225	0.0629153
	NA	CEC1424	0.13	0.13	0.1	0.1	0.115	0.0173205	0.08	0.09	0.08	0.07	0.08	0.00816497	0.12	0.12	0.11	0.12	0.1175	0.005	0.19	0.18	0.12	0.12	0.1525	0.0377492
	NA	CEC1426	0.15	0.13	0.15	0.16	0.1475	0.0125831	0.07	0.07	0.1	0.11	0.0875	0.0206155	0.09	0.09	0.12	0.12	0.105	0.0173205	0.22	0.22	0.16	0.21	0.2025	0.0287228
	NA	CEC1427	0.15	0.17	0.09	0.09	0.125	0.0412311	0.11	0.11	0.09	0.09	0.1	0.011547	0.12	0.12	0.13	0.13	0.125	0.0057735	0.25	0.25	0.29	0.3	0.2725	0.0262996
	NA	CEC1492	0.25	0.26	0.22	0.2	0.2325	0.0275379	0.11	0.11	0.08	0.09	0.0975	0.015	0.16	0.16	0.17	0.17	0.165	0.0057735	0.18	0.2	0.18	0.21	0.1925	0.015
	NA	CEC2018	0.16	0.13	0.12	0.13	0.135	0.0173205	0.06	0.05	0.06	0.06	0.0575	0.005	0.08	0.08	0.09	0.13	0.095	0.0238048	0.21	0.23	0.27	0.24	0.2375	0.025
	NA	CEC2019	0.2	0.19	0.13	0.12	0.16	0.0408248	0.14	0.14	0.18	0.16	0.155	0.0191485	0.18	0.17	0.26	0.24	0.2125	0.0442531	0.31	0.36	0.47	0.47	0.4025	0.0805709
	NA	CEC2020	0.36	0.31	0.32	0.32	0.3275	0.0221736	0.15	0.14	0.16	0.17	0.155	0.0129099	0.15	0.15	0.23	0.26	0.1975	0.0561991	0.41	0.4	0.48	0.58	0.4675	0.0830161
	NA	CEC2021	0.21	0.19	0.11	0.09	0.15	0.0588784	0.09	0.09	0.07	0.07	0.08	0.011547	0.09	0.09	0.14	0.14	0.115	0.0288675	0.19	0.2	0.18	0.19	0.19	0.00816497
	NA	CEC2022	0.13	0.13	0.16	0.15	0.1425	0.015	0.07	0.07	0.09	0.07	0.075	0.01	0.1	0.13	0.16	0.16	0.1375	0.0287228	0.16	0.17	0.2	0.21	0.185	0.0238048
	NA	CEC2023	0.16	0.13	0.16	0.17	0.155	0.0173205	0.06	0.06	0.05	0.05	0.055	0.0057735	0.08	0.08	0.1	0.1	0.09	0.011547	0.19	0.27	0.27	0.28	0.2525	0.0419325
	NA	CEC2871	0.61	0.65	0.49	0.65	0.6	0.0757188	0.38	0.39	0.16	0.18	0.2775	0.124466	0.18	0.19	0.17	0.2	0.185	0.0129099	0.3	0.29	0.39	0.36	0.335	0.0479583
	NA	CEC2872	0.2	0.24	0.18	0.19	0.2025	0.0262996	0.11	0.12	0.08	0.13	0.11	0.0216025	0.13	0.14	0.15	0.17	0.1475	0.0170783	0.19	0.19	0.24	0.23	0.2125	0.0262996
	NA	CEC2876	0.18	0.18	0.13	0.15	0.16	0.0244949	0.11	0.12	0.09	0.15	0.1175	0.025	0.14	0.15	0.15	0.18	0.155	0.0173205	0.19	0.22	0.29	0.24	0.235	0.0420317
	NA	CEC3494	0.14	0.14	0.2	0.19	0.1675	0.0320156	0.07	0.07	0.07	0.06	0.0675	0.005	0.08	0.08	0.07	0.06	0.0725	0.00957427	0.15	0.13	0.12	0.09	0.1225	0.025
	NA	CEC3529	0.27	0.26	0.38	0.41	0.33	0.0761577	0.1	0.09	0.11	0.11	0.1025	0.00957427	0.07	0.07	0.07	0.08	0.0725	0.005	0.19	0.21	0.12	0.13	0.1625	0.0442531
	NA	CEC3530	0.15	0.16	0.09	0.1	0.125	0.0351188	0.06	0.06	0.05	0.07	0.06	0.00816497	0.09	0.09	0.1	0.1	0.095	0.0057735	0.14	0.14	0.13	0.14	0.1375	0.005
	NA	CEC3531	0.17	0.18	0.11	0.12	0.145	0.0351188	0.17	0.18	0.17	0.19	0.1775	0.00957427	0.17	0.18	0.2	0.22	0.1925	0.0221736	0.25	0.27	0.37	0.37	0.315	0.0640312
	NA	CEC3532	0.24	0.24	0.31	0.29	0.27	0.0355903	0.07	0.07	0.08	0.08	0.075	0.0057735	0.1	0.1	0.12	0.12	0.11	0.011547	0.21	0.21	0.25	0.27	0.235	0.03
	NA	CEC3533	0.33	0.24	0.28	0.2	0.2625	0.0556028	0.19	0.2	0.15	0.15	0.1725	0.0262996	0.11	0.12	0.14	0.13	0.125	0.0129099	0.5	0.5	0.48	0.44	0.48	0.0282843
	NA	CEC3534	0.11	0.1	0.15	0.12	0.12	0.0216025	0.07	0.06	0.08	0.06	0.0675	0.00957427	0.1	0.09	0.07	0.06	0.08	0.0182574	0.11	0.08	0.14	0.12	0.1125	0.025
	NA	CEC3535	0.13	0.14	0.14	0.12	0.1325	0.00957427	0.1	0.09	0.09	0.09	0.0925	0.005	0.11	0.12	0.14	0.14	0.1275	0.015	0.27	0.2	0.21	0.22	0.225	0.0310913
	NA	CEC3536	0.12	0.1	0.12	0.09	0.1075	0.015	0.13	0.1	0.11	0.11	0.1125	0.0125831	0.1	0.1	0.12	0.12	0.11	0.011547	0.26	0.15	0.25	0.23	0.2225	0.0499166
	NA	CEC3537	0.18	0.21	0.2	0.19	0.195	0.0129099	0.09	0.08	0.09	0.08	0.085	0.0057735	0.11	0.11	0.12	0.11	0.1125	0.005	0.43	0.42	0.36	0.39	0.4	0.0316228
	NA	CEC3540	0.13	0.11	0.14	0.12	0.125	0.0129099	0.13	0.13	0.16	0.14	0.14	0.0141421	0.12	0.11	0.14	0.13	0.125	0.0129099	0.36	0.35	0.27	0.28	0.315	0.0465475
	NA	CEC3541	0.13	0.12	0.14	0.14	0.1325	0.00957427	0.06	0.06	0.07	0.07	0.065	0.0057735	0.1	0.11	0.1	0.11	0.105	0.0057735	0.19	0.15	0.21	0.2	0.1875	0.0262996
	NA	CEC3544	0.21	0.17	0.43	0.27	0.27	0.11431	0.11	0.09	0.18	0.11	0.1225	0.0394757	0.07	0.06	0.07	0.07	0.0675	0.005	0.13	0.13	0.12	0.11	0.1225	0.00957427
	NA	CEC3547	0.26	0.31	0.42	0.39	0.345	0.0732575	0.08	0.08	0.07	0.07	0.075	0.0057735	0.07	0.07	0.06	0.06	0.065	0.0057735	0.13	0.12	0.08	0.09	0.105	0.0238048
	NA	CEC3548	0.21	0.23	0.16	0.19	0.1975	0.0298608	0.1	0.1	0.07	0.07	0.085	0.0173205	0.13	0.13	0.07	0.07	0.1	0.034641	0.24	0.24	0.16	0.18	0.205	0.0412311
	NA	CEC3549	0.18	0.16	0.24	0.25	0.2075	0.0442531	0.18	0.15	0.2	0.18	0.1775	0.0206155	0.12	0.13	0.13	0.12	0.125	0.0057735	0.34	0.33	0.28	0.27	0.305	0.0351188
	NA	CEC3550	0.19	0.18	0.24	0.24	0.2125	0.0320156	0.22	0.23	0.12	0.12	0.1725	0.0607591	0.18	0.13	0.21	0.18	0.175	0.0331662	0.42	0.38	0.33	0.31	0.36	0.0496655
	NA	CEC3551	0.18	0.15	0.17	0.16	0.165	0.0129099	0.13	0.15	0.11	0.1	0.1225	0.0221736	0.11	0.11	0.11	0.11	0.11	0	0.14	0.14	0.21	0.21	0.175	0.0404145
	NA	CEC3553	0.12	0.11	0.18	0.17	0.145	0.0351188	0.1	0.11	0.11	0.11	0.1075	0.005	0.14	0.12	0.13	0.14	0.1325	0.00957427	0.24	0.23	0.29	0.26	0.255	0.0264575
	NA	CEC3554	0.11	0.1	0.2	0.2	0.1525	0.055	0.13	0.12	0.1	0.11	0.115	0.0129099	0.14	0.14	0.15	0.16	0.1475	0.00957427	0.2	0.25	0.23	0.24	0.23	0.0216025
	NA	CEC3555	0.22	0.22	0.25	0.24	0.2325	0.015	0.15	0.13	0.16	0.16	0.15	0.0141421	0.17	0.17	0.16	0.17	0.1675	0.005	0.36	0.38	0.41	0.41	0.39	0.0244949
	NA	CEC3556	0.08	0.11	0.11	0.13	0.1075	0.0206155	0.09	0.1	0.08	0.08	0.0875	0.00957427	0.1	0.1	0.12	0.12	0.11	0.011547	0.2	0.18	0.21	0.31	0.225	0.058023
	NA	CEC3557	0.13	0.09	0.21	0.28	0.1775	0.0846069	0.06	0.06	0.06	0.06	0.06	0	0.09	0.1	0.09	0.09	0.0925	0.005	0.21	0.14	0.19	0.23	0.1925	0.0386221
	NA	CEC3558	0.17	0.16	0.21	0.2	0.185	0.0238048	0.17	0.21	0.17	0.18	0.1825	0.0189297	0.22	0.21	0.22	0.22	0.2175	0.005	0.36	0.39	0.38	0.39	0.38	0.0141421
	NA	CEC3559	0.12	0.12	0.13	0.13	0.125	0.0057735	0.09	0.09	0.07	0.08	0.0825	0.00957427	0.11	0.11	0.09	0.1	0.1025	0.00957427	0.24	0.28	0.27	0.27	0.265	0.0173205
	DSY5021	CEC3560	0.208719	0.178202	0.116998	0.108168	0.153022	0.0484625	0.371831	0.326761	0.100177	0.0941206	0.223222	0.146756	0.146752	0.146752	0.149062	0.1417	0.146067	0.00310769	0.213575	0.225278	0.062963	0.0864198	0.147059	0.0842454
	NA	CEC3561	0.23	0.25	0.13	0.16	0.1925	0.0567891	0.05	0.06	0.03	0.04	0.045	0.0129099	0.06	0.07	0.04	0.04	0.0525	0.015	0.1	0.1	0.07	0.07	0.085	0.0173205
	NA	CEC3579	0.09	0.11	0.13	0.14	0.1175	0.0221736	0.2	0.11	0.1	0.11	0.13	0.0469042	0.11	0.11	0.14	0.14	0.125	0.0173205	0.24	0.21	0.31	0.32	0.27	0.0535413
	NA	CEC3596	0.09	0.1	0.17	0.22	0.145	0.0613732	0.2	0.26	0.11	0.11	0.17	0.0734847	0.13	0.13	0.13	0.15	0.135	0.01	0.29	0.36	0.36	0.31	0.33	0.0355903
	NA	CEC3597	0.3	0.31	0.34	0.36	0.3275	0.0275379	0.09	0.08	0.15	0.17	0.1225	0.0442531	0.13	0.13	0.17	0.2	0.1575	0.0340343	0.24	0.26	0.22	0.23	0.2375	0.0170783
	NA	CEC3600	0.12	0.13	0.1	0.16	0.1275	0.025	0.08	0.09	0.1	0.09	0.09	0.00816497	0.18	0.17	0.14	0.16	0.1625	0.0170783	0.33	0.32	0.27	0.28	0.3	0.0294392
	NA	CEC3601	0.12	0.12	0.13	0.17	0.135	0.0238048	0.06	0.06	0.04	0.05	0.0525	0.00957427	0.07	0.07	0.05	0.05	0.06	0.011547	0.1	0.11	0.08	0.1	0.0975	0.0125831
	NA	CEC3602	0.08	0.09	0.1	0.11	0.095	0.0129099	0.12	0.11	0.08	0.08	0.0975	0.0206155	0.1	0.1	0.11	0.11	0.105	0.0057735	0.16	0.16	0.15	0.16	0.1575	0.005
	NA	CEC3603	0.39	0.33	0.27	0.21	0.3	0.0774597	0.08	0.07	0.09	0.08	0.08	0.00816497	0.07	0.06	0.07	0.06	0.065	0.0057735	0.19	0.2	0.16	0.14	0.1725	0.0275379
	NA	CEC3605	0.14	0.13	0.14	0.1	0.1275	0.0189297	0.06	0.06	0.07	0.06	0.0625	0.005	0.09	0.08	0.06	0.06	0.0725	0.015	0.13	0.13	0.15	0.12	0.1325	0.0125831
	NA	CEC3607	0.14	0.14	0.12	0.13	0.1325	0.00957427	0.12	0.13	0.06	0.06	0.0925	0.0377492	0.13	0.13	0.11	0.11	0.12	0.011547	0.21	0.2	0.2	0.17	0.195	0.0173205
	NA	CEC3609	0.13	0.11	0.14	0.14	0.13	0.0141421	0.08	0.08	0.08	0.08	0.08	0	0.09	0.08	0.09	0.08	0.085	0.0057735	0.12	0.12	0.13	0.11	0.12	0.00816497
	NA	CEC3610	0.26	0.2	0.08	0.07	0.1525	0.0928709	0.1	0.12	0.13	0.06	0.1025	0.030957	0.08	0.08	0.06	0.07	0.0725	0.00957427	0.16	0.15	0.06	0.06	0.1075	0.055
	NA	CEC3611	0.07	0.05	0.05	0.05	0.055	0.01	0.07	0.06	0.07	0.1	0.075	0.0173205	0.07	0.06	0.06	0.05	0.06	0.00816497	0.13	0.13	0.06	0.05	0.0925	0.0434933
	NA	CEC3612	0.09	0.07	0.15	0.14	0.1125	0.0386221	0.2	0.2	0.19	0.2	0.1975	0.005	0.11	0.11	0.17	0.16	0.1375	0.0320156	0.17	0.16	0.07	0.08	0.12	0.0522813
	NA	CEC3613	0.09	0.07	0.09	0.11	0.09	0.0163299	0.13	0.12	0.13	0.12	0.125	0.0057735	0.11	0.12	0.14	0.14	0.1275	0.015	0.26	0.26	0.08	0.08	0.17	0.103923
	NA	CEC3614	0.1	0.07	0.11	0.1	0.095	0.0173205	0.15	0.16	0.15	0.16	0.155	0.0057735	0.08	0.07	0.15	0.15	0.1125	0.0434933	0.11	0.11	0.05	0.05	0.08	0.034641
	NA	CEC3615	0.14	0.13	0.19	0.14	0.15	0.0270801	0.16	0.15	0.17	0.17	0.1625	0.00957427	0.12	0.11	0.13	0.14	0.125	0.0129099	0.25	0.21	0.1	0.11	0.1675	0.0741058
	NA	CEC3616	0.43	0.44	0.3	0.37	0.385	0.0645497	0.19	0.19	0.23	0.28	0.2225	0.04272	0.16	0.16	0.18	0.18	0.17	0.011547	0.27	0.33	0.13	0.11	0.21	0.107083
	NA	CEC3617	0.16	0.17	0.14	0.11	0.145	0.0264575	0.11	0.11	0.08	0.09	0.0975	0.015	0.1	0.1	0.09	0.09	0.095	0.0057735	0.26	0.24	0.2	0.19	0.2225	0.0330404
	NA	CEC3618	0.16	0.16	0.1	0.11	0.1325	0.0320156	0.08	0.08	0.06	0.07	0.0725	0.00957427	0.09	0.09	0.05	0.06	0.0725	0.0206155	0.12	0.13	0.11	0.12	0.12	0.00816497
	NA	CEC3619	0.36	0.36	0.15	0.15	0.255	0.121244	0.08	0.09	0.1	0.11	0.095	0.0129099	0.05	0.05	0.04	0.04	0.045	0.0057735	0.07	0.09	0.04	0.04	0.06	0.0244949
	NA	CEC3622	0.55	0.47	0.24	0.2	0.365	0.171367	0.1	0.13	0.1	0.1	0.1075	0.015	0.07	0.06	0.05	0.05	0.0575	0.00957427	0.12	0.14	0.06	0.05	0.0925	0.0442531
	NA	CEC3623-3	0.08	0.08	0.07	0.09	0.08	0.00816497	0.06	0.08	0.1	0.07	0.0775	0.0170783	0.07	0.06	0.06	0.06	0.0625	0.005	0.14	0.14	0.04	0.04	0.09	0.057735
	NA	CEC3626	0.3	0.26	0.36	0.35	0.3175	0.0464579	0.1	0.1	0.08	0.09	0.0925	0.00957427	0.11	0.11	0.09	0.11	0.105	0.01	0.21	0.22	0.17	0.19	0.1975	0.0221736
	NA	CEC3627	0.12	0.12	0.12	0.12	0.12	0	0.08	0.08	0.06	0.05	0.0675	0.015	0.11	0.11	0.07	0.07	0.09	0.023094	0.18	0.17	0.18	0.18	0.1775	0.005
	NA	CEC3629	0.31	0.28	0.34	0.36	0.3225	0.035	0.08	0.07	0.08	0.08	0.0775	0.005	0.1	0.1	0.07	0.07	0.085	0.0173205	0.15	0.16	0.08	0.08	0.1175	0.0434933
	NA	CEC3631	0.16	0.17	0.19	0.19	0.1775	0.015	0.06	0.06	0.05	0.05	0.055	0.0057735	0.09	0.08	0.05	0.05	0.0675	0.0206155	0.1	0.08	0.12	0.13	0.1075	0.0221736
	DSY5022	CEC3634	0.368653	0.324503	0.385593	0.326271	0.351255	0.0306684	0.405405	0.351351	0.112811	0.102613	0.243045	0.157875	0.0639955	0.0662215	0.034686	0.0292451	0.048537	0.019285	0.0467947	0.0424669	0.0369143	0.0321817	0.0395894	0.00638294
	DSY5023	CEC3636	0.149375	0.147203	0.0969925	0.056391	0.11249	0.044545	0.0673077	0.0637019	0.0580482	0.0479087	0.0592416	0.00846196	0.1005	0.0841291	0.0687274	0.0595199	0.0782192	0.0179919	0.0572554	0.0536201	0.0578818	0.0541872	0.0557361	0.00214388
	NA	CEC3637	0.2	0.17	0.29	0.35	0.2525	0.0826136	0.07	0.08	0.05	0.06	0.065	0.0129099	0.08	0.08	0.05	0.07	0.07	0.0141421	0.15	0.18	0.11	0.12	0.14	0.0316228
	DSY5024	CEC3638	0.157748	0.0926012	0.164397	0.104086	0.129708	0.0366195	0.126126	0.101351	0.108559	0.0967025	0.108185	0.0129173	0.106053	0.105085	0.104726	0.0941399	0.102501	0.00560216	0.0951374	0.0849894	0.0760719	0.077455	0.0834135	0.0087433
	DSY5025	CEC3658	0.108928	0.0850064	0.109541	0.0859835	0.0973646	0.0137139	0.0860702	0.0838052	0.105568	0.0859688	0.090353	0.0101969	0.103007	0.101893	0.0869043	0.0804966	0.0930752	0.0111459	0.12176	0.143276	0.0746032	0.0761905	0.103958	0.034135
	DSY5026	CEC3659	0.124786	0.106553	0.103182	0.0954677	0.107497	0.0124249	0.0858086	0.0742574	0.109837	0.0974857	0.0918471	0.0152892	0.116133	0.102323	0.110421	0.101552	0.107607	0.00695702	0.110839	0.101041	0.0831255	0.0864505	0.095364	0.012922
	DSY5027	CEC3660	0.261131	0.221019	0.198969	0.168041	0.21229	0.0391453	0.137405	0.167939	0.118935	0.124088	0.137092	0.021988	0.135775	0.142535	0.164021	0.165945	0.152069	0.0151855	0.133364	0.131518	0.107937	0.106349	0.119792	0.0146398
	DSY5028	CEC3661	0.198215	0.205864	0.179458	0.183973	0.191878	0.0122814	0.14557	0.136076	0.126761	0.138711	0.136779	0.00778611	0.127049	0.122365	0.106704	0.0924236	0.112135	0.01576	0.0994447	0.0812721	0.0747664	0.0704529	0.081484	0.0127729
	DSY5029	CEC3662	0.230345	0.246897	0.102709	0.0981941	0.169536	0.0800789	0.107296	0.0922747	0.0896845	0.0840128	0.093317	0.00993756	0.107412	0.0973618	0.0599831	0.0667418	0.0828747	0.023067	0.051487	0.051487	0.0745763	0.0711864	0.0621842	0.0124293
	DSY5030	CEC3663	0.142857	0.128097	0.0700086	0.06828	0.102311	0.0387748	0.0812183	0.0783176	0.109771	0.112988	0.0955735	0.0183362	0.145884	0.144673	0.0960854	0.0960854	0.120682	0.0284059	0.130972	0.130972	0.0680851	0.0680851	0.0995288	0.0363081
	DSY5031	CEC3664	0.123706	0.113849	0.11411	0.116564	0.117058	0.00459813	0.066838	0.0685518	0.0998714	0.0930133	0.0820686	0.0168464	0.116499	0.112951	0.0914884	0.0969504	0.104472	0.0121339	0.0951102	0.088662	0.0713073	0.0713073	0.0815967	0.0121693
	DSY5032	CEC3665	0.242236	0.257143	0.127273	0.166434	0.198271	0.0617878	0.136095	0.147929	0.11973	0.115233	0.129747	0.0150761	0.139344	0.143127	0.112506	0.102849	0.124457	0.0198322	0.159934	0.13337	0.100251	0.101921	0.123869	0.0284631
	DSY5033	CEC3668	0.152941	0.143529	0.0962733	0.0900621	0.120702	0.0321249	0.0784929	0.0769231	0.0482208	0.0468906	0.0626319	0.0174287	0.0705502	0.0731392	0.0391502	0.0379363	0.055194	0.019262	0.0801919	0.0856751	0.0505476	0.0505476	0.0667406	0.0188315
	DSY5034	CEC3669	0.143329	0.149938	0.187761	0.146036	0.156766	0.0208405	0.08519	0.0747051	0.166283	0.17181	0.124497	0.0516684	0.164557	0.154913	0.133487	0.137182	0.147535	0.0147048	0.116105	0.124666	0.092545	0.092545	0.106465	0.0164491
	DSY5035	CEC3671	0.103936	0.118089	0.0886214	0.0842451	0.098723	0.015426	0.0850242	0.0811594	0.0915587	0.0879857	0.086432	0.00441511	0.0936368	0.0894982	0.0640309	0.0657499	0.078229	0.0155103	0.0799801	0.0819672	0.06231	0.0607903	0.0712619	0.0112606
	DSY5036	CEC3672	0.175258	0.163476	0.179412	0.179412	0.174389	0.00753463	0.158004	0.153846	0.188199	0.208545	0.177149	0.0259319	0.114305	0.098262	0.0647758	0.05711	0.0836132	0.0271651	0.073207	0.0672612	0.069431	0.069431	0.0698326	0.00247123
	DSY5037	CEC3673	0.0814196	0.0981211	0.0664675	0.0664675	0.0781189	0.015083	0.0476506	0.0463269	0.0546258	0.0508367	0.04986	0.00369826	0.0811706	0.082275	0.0847458	0.0847458	0.0832343	0.0018026	0.0847815	0.076356	0.059751	0.0580913	0.0697449	0.0129806
	DSY5038	CEC3674	0.120661	0.109642	0.0848018	0.0803965	0.0988753	0.0194086	0.116935	0.145161	0.0550725	0.0616977	0.0947167	0.04359	0.0721003	0.0708464	0.058482	0.0568229	0.0645629	0.00802455	0.0613797	0.0657251	0.0527578	0.0527578	0.0581551	0.00647985
	DSY5039	CEC3675	0.178288	0.2	0.124288	0.148956	0.162883	0.0331586	0.163399	0.137255	0.0912148	0.0895334	0.12035	0.0362284	0.109293	0.104058	0.104084	0.109354	0.106697	0.00303286	0.113939	0.116252	0.0811688	0.0698052	0.0952912	0.0233529
	DSY5040	CEC3676	0.115812	0.0861978	0.10083	0.11981	0.105663	0.0153339	0.0617399	0.0673527	0.0769985	0.0868073	0.0732246	0.0110319	0.0834952	0.0860841	0.0741616	0.0817194	0.0813651	0.00512585	0.0884167	0.0911583	0.0537022	0.0569569	0.0725585	0.01997
	DSY5041	CEC3678	0.263952	0.245852	0.163907	0.177152	0.212716	0.0495653	0.196319	0.233129	0.126503	0.14482	0.175193	0.0486352	0.10945	0.114234	0.0987912	0.11213	0.108651	0.00685889	0.104825	0.111481	0.0749004	0.0749004	0.0915267	0.0193898
	DSY5042	CEC3679	0.0999477	0.0978545	0.0944373	0.122898	0.103784	0.0129431	0.115473	0.138568	0.0836364	0.0794805	0.10429	0.0279412	0.0709019	0.0743052	0.0595522	0.0786089	0.070842	0.0081605	0.0555874	0.0624642	0.0420372	0.043654	0.0509357	0.00977668
	DSY5043	CEC3680	0.104554	0.0994227	0.111402	0.116645	0.108006	0.00756642	0.131579	0.149123	0.0833754	0.0914603	0.113884	0.031562	0.101899	0.101899	0.0809628	0.087965	0.0931813	0.010464	0.0889012	0.102153	0.0614912	0.0599539	0.0781249	0.0208196
	DSY5044	CEC3681	0.163869	0.170495	0.152475	0.131353	0.154548	0.0171608	0.0974674	0.106677	0.0987246	0.102503	0.101343	0.00415025	0.113381	0.116372	0.100447	0.092314	0.105629	0.0112494	0.0945915	0.101036	0.0893246	0.0910675	0.0940048	0.00517395
	DSY5045	CEC3682	0.299189	0.259396	0.472924	0.400722	0.358058	0.096978	0.1669	0.15942	0.181904	0.151744	0.164992	0.012861	0.110675	0.0998773	0.0706505	0.0582011	0.0848509	0.0245258	0.0973451	0.0992586	0.0737615	0.066422	0.0841968	0.0165788
	DSY5046	CEC3683	0.119842	0.140192	0.147077	0.132308	0.134855	0.0116869	0.133175	0.130464	0.0947278	0.103301	0.115417	0.0192927	0.114166	0.114166	0.127252	0.113306	0.117222	0.00669853	0.098309	0.0914302	0.107575	0.107575	0.101222	0.00785453
	DSY5047	CEC3685	0.173443	0.104671	0.161845	0.118061	0.139505	0.0332871	0.125653	0.124553	0.125488	0.103179	0.119718	0.0110368	0.129418	0.126229	0.103795	0.103795	0.115809	0.0139338	0.096791	0.089486	0.121518	0.112033	0.104957	0.0144955
	DSY5048	CEC3686	0.193575	0.166218	0.134997	0.127319	0.155527	0.0304363	0.164155	0.197991	0.111014	0.0969724	0.142533	0.0469481	0.158236	0.146275	0.117859	0.10827	0.13266	0.0234764	0.144146	0.136124	0.113103	0.118224	0.1279	0.0146533
	DSY5049	CEC3704	0.156767	0.164115	0.137482	0.149059	0.151856	0.0113847	0.153258	0.137079	0.183673	0.187561	0.165393	0.024321	0.0987342	0.0897328	0.0997389	0.0788512	0.0917643	0.00971338	0.0849495	0.0751161	0.0860865	0.0805026	0.0816637	0.00498589
	DSY5050	CEC3706	0.386021	0.357241	0.168995	0.1726	0.271214	0.116554	0.269088	0.240492	0.165724	0.163984	0.209822	0.0532253	0.30469	0.244957	0.189744	0.18042	0.229952	0.0573906	0.169048	0.160421	0.174094	0.171717	0.16882	0.00596685
	DSY5051	CEC3707	0.199102	0.203855	0.19911	0.19911	0.200294	0.00237392	0.112242	0.116057	0.137759	0.126338	0.123099	0.0114436	0.0922947	0.0866497	0.0870214	0.0810542	0.086755	0.00459235	0.0717454	0.0696582	0.0838227	0.0774159	0.0756606	0.0063524
	DSY5052	CEC3708	0.101	0.0933094	0.10168	0.108753	0.101186	0.00631357	0.121255	0.121255	0.113443	0.100328	0.11407	0.00987375	0.115479	0.105651	0.101721	0.0975483	0.1051	0.00766971	0.0911893	0.0932443	0.0964062	0.0872789	0.0920297	0.00382555
	DSY5053	CEC3711	0.166065	0.156782	0.33711	0.314448	0.243601	0.095416	0.337306	0.307112	0.491525	0.468927	0.401217	0.0925213	0.310866	0.314646	0.258897	0.236567	0.280244	0.0386634	0.188709	0.179829	0.243754	0.20054	0.203208	0.0283309
	DSY5054	CEC3712	0.108857	0.0980744	0.139214	0.12221	0.117089	0.0177486	0.119587	0.11844	0.115627	0.110021	0.115919	0.0042693	0.145999	0.143953	0.100428	0.0985245	0.122226	0.0262938	0.100843	0.092673	0.0964863	0.0897936	0.0949489	0.00479078
	DSY5055	CEC3715	0.293683	0.305988	0.208548	0.202653	0.252718	0.0546912	0.196989	0.181932	0.180345	0.174072	0.183335	0.00971481	0.174377	0.19051	0.186182	0.177209	0.18207	0.00754869	0.165543	0.165543	0.186035	0.18404	0.17529	0.0112845
	DSY5056	CEC3716	0.142573	0.172414	0.137595	0.141929	0.148627	0.0160109	0.10938	0.105485	0.0926885	0.099597	0.101788	0.00727805	0.128307	0.120341	0.110341	0.103408	0.115599	0.0109583	0.103309	0.120576	0.139834	0.124717	0.122109	0.0150194
	DSY5057	CEC3786	0.259232	0.233164	0.414226	0.447699	0.33858	0.10807	0.18067	0.165294	0.435666	0.363431	0.286265	0.134238	0.121275	0.117734	0.078219	0.0669876	0.0960538	0.0275018	0.08035	0.08035	0.0716405	0.0682493	0.0751475	0.00616488
	DSY5058	CEC4032	0.243857	0.302832	0.178808	0.161148	0.221661	0.0647548	0.194469	0.20506	0.160394	0.176607	0.184132	0.019706	0.14987	0.15449	0.122049	0.122049	0.137115	0.0174981	0.128274	0.139076	0.171043	0.17956	0.154489	0.0246803
	DSY5059	CEC4035	0.230472	0.279653	0.31992	0.247485	0.269382	0.0393826	0.21793	0.219838	0.212233	0.212233	0.215559	0.00391793	0.163308	0.159699	0.106346	0.115099	0.136113	0.0295725	0.125824	0.125824	0.119296	0.117097	0.12201	0.00449414
	DSY5060	CEC4038	0.197556	0.224071	0.169308	0.162635	0.188393	0.0281932	0.11001	0.108688	0.0968801	0.0881226	0.100925	0.0103774	0.0953559	0.0953559	0.104446	0.100161	0.0988295	0.00437588	0.0959061	0.0959061	0.0722154	0.0722154	0.0840608	0.0136778
	DSY5061	CEC4039	0.182517	0.18867	0.191122	0.176325	0.184659	0.0066305	0.139317	0.134482	0.128339	0.123127	0.131316	0.00707015	0.124448	0.122095	0.110768	0.106646	0.115989	0.00862929	0.122345	0.111589	0.0911201	0.0887986	0.103463	0.016227
	DSY5062	CEC4103	0.136178	0.131863	0.106709	0.106709	0.120365	0.0158663	0.145175	0.138221	0.119833	0.121926	0.131289	0.0123801	0.153169	0.140665	0.0997722	0.105239	0.124711	0.026239	0.129815	0.12525	0.133888	0.133888	0.13071	0.00411596
	DSY5063	CEC4104	0.113265	0.106731	0.0996198	0.105703	0.10633	0.00558796	0.14138	0.130435	0.0954064	0.0994447	0.116667	0.0227224	0.149158	0.130781	0.101867	0.114667	0.124118	0.02046	0.115761	0.119811	0.149881	0.156225	0.13542	0.020592
	DSY5064	CEC4106	0.168614	0.168614	0.379679	0.465241	0.295537	0.150663	0.209818	0.311164	0.287834	0.35905	0.291967	0.0622743	0.103448	0.132743	0.086159	0.0883824	0.102683	0.0214613	0.0954166	0.0988758	0.0954516	0.0954516	0.0962989	0.00171799
	DSY5065	CEC4107	0.135903	0.13286	0.375494	0.328063	0.24308	0.127005	0.133365	0.148552	0.3486	0.358779	0.247324	0.123047	0.0887262	0.0875549	0.097158	0.115664	0.0972758	0.0129838	0.087094	0.077896	0.110789	0.1021	0.0944698	0.0147608
	DSY5066	CEC4108	0.137889	0.123246	0.316364	0.36	0.234375	0.12133	0.202776	0.169063	0.354667	0.397333	0.28096	0.111966	0.0982368	0.106073	0.102582	0.108165	0.103764	0.00434535	0.0929781	0.0885373	0.124903	0.131109	0.109382	0.0217299
	NA	CEC4217	0.3	0.28	0.34	0.32	0.31	0.0258199	0.08	0.08	0.12	0.1	0.095	0.0191485	0.07	0.07	0.07	0.07	0.07	0	0.18	0.18	0.09	0.1	0.1375	0.0492443
	NA	CEC4218	0.13	0.12	0.17	0.18	0.15	0.0294392	0.09	0.08	0.07	0.06	0.075	0.0129099	0.15	0.12	0.09	0.09	0.1125	0.0287228	0.28	0.29	0.18	0.18	0.2325	0.0607591
	DSY5067	CEC4254	0.147463	0.174016	NA	NA	0.16074	0.093434	0.131961	0.137361	NA	NA	0.134661	0.0777777	0.122798	0.13134	NA	NA	0.127069	0.0734461	0.10485	0.0961799	NA	NA	0.100515	0.0581401
	DSY5068	CEC4256	0.111222	0.0892768	0.153247	0.122078	0.118956	0.0266225	0.083137	0.0750589	0.0652557	0.0593768	0.0707071	0.0105124	0.0904287	0.0845567	0.0568889	0.0506667	0.0706352	0.0197762	0.0739789	0.0682662	0.0580069	0.0530491	0.0633253	0.00951834
	DSY5069	CEC4259	0.258026	0.25327	0.229167	0.229167	0.242407	0.0154118	0.200242	0.240109	0.148034	0.148034	0.184105	0.0447177	0.207931	0.212219	0.14944	0.16096	0.182638	0.0320771	0.213559	0.22399	0.146807	0.125795	0.177538	0.0485697
	DSY5070	CEC4261	0.231471	0.194983	0.288079	0.274834	0.247342	0.0424608	0.224413	0.239437	0.22854	0.201784	0.223543	0.0158303	0.110849	0.104953	0.0971678	0.091939	0.101227	0.00835086	0.0944123	0.0900083	0.0790806	0.0790806	0.0856455	0.00779072
	DSY5071	CEC4479	0.104997	0.104997	0.152364	0.141856	0.126054	0.0246896	0.107848	0.11519	0.130897	0.117608	0.117886	0.00961594	0.102305	0.105677	0.0916431	0.0884134	0.0970097	0.00828377	0.0993234	0.0928281	0.0845243	0.0812577	0.0894834	0.00817045
	DSY5072	CEC4480	0.495519	0.480154	0.348558	0.262019	0.396562	0.111335	0.424736	0.451582	0.314472	0.284004	0.368699	0.0819013	0.191271	0.216945	0.117952	0.0960073	0.155544	0.0577473	0.177288	0.173664	0.110412	0.102862	0.141057	0.0398906
	DSY5073	CEC4481	0.181353	0.156339	0.172945	0.148973	0.164902	0.0148594	0.113842	0.113842	0.116434	0.103064	0.111795	0.00594787	0.107736	0.107736	0.113957	0.103713	0.108286	0.00422963	0.0992679	0.0969253	0.0902224	0.0851867	0.0929006	0.00641399
	DSY5074	CEC4482	0.196288	0.198144	0.275045	0.256831	0.231577	0.0403748	0.218484	0.223921	0.24685	0.250583	0.23496	0.0161117	0.215017	0.188851	0.229055	0.202641	0.208891	0.0171733	0.174938	0.176047	0.129296	0.12275	0.150757	0.0286894
	DSY5077	CEC4485	0.325153	0.300613	0.351598	0.324201	0.325391	0.0208344	0.184371	0.169719	0.167579	0.167579	0.172312	0.0081023	0.0950413	0.0922865	0.124142	0.124142	0.108903	0.0176326	0.0742946	0.0660109	0.0979813	0.0920729	0.0825899	0.0149499
	DSY5076	CEC4486	0.0814332	0.0851559	0.114776	0.12533	0.101674	0.0217086	0.073663	0.0723175	0.0903522	0.0862685	0.0806503	0.00901756	0.0790094	0.0778302	0.0750491	0.0797642	0.0779132	0.00206865	0.0655501	0.0563096	0.0589613	0.0605232	0.0603361	0.00388689
	DSY5078	CEC4487	0.173847	0.161683	0.197605	0.177645	0.177695	0.0149176	0.12586	0.127479	0.163924	0.158657	0.14398	0.0201146	0.153295	0.160458	0.184641	0.164314	0.165677	0.0134419	0.166163	0.154079	0.122619	0.11871	0.140393	0.0233628
	DSY5079	CEC4488	0.14709	0.14709	0.20743	0.201238	0.175712	0.0331466	0.0706173	0.068642	0.07161	0.07161	0.0706198	0.00139912	0.0603622	0.056338	0.0482137	0.0537634	0.0546693	0.00508885	0.0644379	0.0665948	0.0477826	0.0432046	0.0555049	0.0117433
	DSY5080	CEC4489	0.165217	0.181781	0.127249	0.134961	0.152302	0.0255872	0.15632	0.153773	0.171987	0.154836	0.159229	0.00856926	0.15126	0.172269	0.126001	0.12263	0.14304	0.0233011	0.13091	0.118885	0.0881002	0.0881002	0.106499	0.0218048
	DSY5081	CEC4492	0.0839076	0.0887718	0.125517	0.133793	0.107997	0.0253134	0.118795	0.125642	0.14131	0.139145	0.131223	0.0108029	0.101714	0.101714	0.130473	0.118089	0.112998	0.0139755	0.0745254	0.0733919	0.0914543	0.0914543	0.0827065	0.0101117
	DSY5082	CEC4493	0.0807234	0.0895457	0.147877	0.133236	0.112845	0.0327499	0.113423	0.114811	0.153963	0.151944	0.133535	0.0224442	0.152131	0.157377	0.153008	0.147323	0.15246	0.00412185	0.138301	0.132168	0.132043	0.130323	0.133209	0.0034978
	DSY5085	CEC4496	0.180157	0.145344	0.255385	0.243077	0.20599	0.0521555	0.162636	0.175913	0.148991	0.151594	0.159784	0.0122723	0.129885	0.147126	0.112215	0.108903	0.124532	0.0176554	0.10366	0.108131	0.106511	0.104787	0.105772	0.00196141
	DSY5086	CEC4497	0.151481	0.171604	0.194672	0.17418	0.172984	0.0176642	0.116096	0.11767	0.129291	0.132213	0.123818	0.00812125	0.124679	0.120823	0.113576	0.117802	0.11922	0.00469846	0.106868	0.106868	0.0955353	0.0993759	0.102162	0.00565587
	DSY5087	CEC4498	0.17009	0.180621	0.328918	0.346578	0.256552	0.0941326	0.104755	0.0939312	0.161328	0.152009	0.128006	0.0336067	0.118299	0.107209	0.118921	0.118921	0.115838	0.00576009	0.0933414	0.0896929	0.0926518	0.0944774	0.0925409	0.0020424
	DSY5088	CEC4499	0.173393	0.178714	0.162764	0.162764	0.169408	0.00797447	0.143513	0.15576	0.0864198	0.0882487	0.118485	0.0363237	0.159902	0.158672	0.0925222	0.095902	0.126749	0.0375995	0.130261	0.12339	0.0875764	0.0810591	0.105571	0.0248443
	DSY5089	CEC4500	0.393635	0.547739	0.570707	0.621212	0.533323	0.0980521	0.399154	0.478138	0.487521	0.480865	0.461419	0.0416972	0.116717	0.131307	0.125166	0.114551	0.121935	0.00774639	0.0918217	0.10127	0.101437	0.106366	0.100224	0.00607955
	NA	CEC4501	0.16	0.21	0.24	0.34	0.2375	0.0758837	0.08	0.12	0.07	0.09	0.09	0.0216025	0.12	0.13	0.09	0.11	0.1125	0.0170783	0.36	0.39	0.23	0.26	0.31	0.0770281
	NA	CEC4502	0.12	0.19	0.2	0.26	0.1925	0.057373	0.07	0.1	0.06	0.08	0.0775	0.0170783	0.09	0.11	0.08	0.1	0.095	0.0129099	0.32	0.39	0.15	0.17	0.2575	0.11644
	NA	CEC45033	1.28	1.29	0.97	0.9	1.11	0.204124	1.2	1.2	1	1	1.1	0.11547	1.25	1.24	0.94	0.93	1.09	0.179072	0.81	0.78	0.73	0.73	0.7625	0.0394757
	NA	CEC45093	1.03	1.03	1.08	1.11	1.0625	0.0394757	1.05	1.03	0.99	1.01	1.02	0.0258199	1.11	1.1	1.08	1.09	1.095	0.0129099	0.96	1.17	1.17	1.13	1.1075	0.100125
	NA	CEC4514	0.32	0.31	0.46	0.26	0.3375	0.0857807	0.09	0.09	0.09	0.09	0.09	0	0.09	0.08	0.15	0.14	0.115	0.0351188	0.3	0.23	0.37	0.27	0.2925	0.0590903
	NA	CEC45203	1.04	1.17	1	0.99	1.05	0.0828654	1.04	1.01	1.04	1	1.0225	0.0206155	1.24	1.1	1.12	1.06	1.13	0.0774597	1	0.99	1.19	1.08	1.065	0.0925563
	NA	CEC45253	1.07	1.05	1.38	0.99	1.1225	0.175	1.11	1.11	1.06	1.05	1.0825	0.0320156	1.09	1.04	1.17	1.16	1.115	0.0613732	1.15	1.09	1.09	1.16	1.1225	0.0377492
	NA	CEC4526	0.17	0.17	0.15	0.11	0.15	0.0282843	0.09	0.08	0.09	0.08	0.085	0.0057735	0.13	0.12	0.16	0.16	0.1425	0.0206155	0.22	0.19	0.25	0.19	0.2125	0.0287228
	NA	CEC45283	0.4	0.33	0.32	0.3	0.3375	0.0434933	1.04	0.57	0.71	0.72	0.76	0.19883	1.15	1.15	1.17	1.15	1.155	0.01	1.01	1.11	1.12	1.12	1.09	0.0535413
	NA	CEC4549	0.15	0.11	0.08	0.07	0.1025	0.0359398	0.06	0.06	0.06	0.06	0.06	0	0.1	0.11	0.12	0.09	0.105	0.0129099	0.16	0.15	0.17	0.14	0.155	0.0129099
	DSY5090	CEC704	0.0820799	0.107864	0.111111	0.139869	0.110231	0.0236452	0.0790982	0.0821551	0.0790136	0.0931052	0.083343	0.00667016	0.0871935	0.0980926	0.0837721	0.0952609	0.0910798	0.00671235	0.0729134	0.0704313	0.0803271	0.0784031	0.0755187	0.00462275
	DSY5092	CEC708	0.18732	0.18732	0.219672	0.239344	0.208414	0.0256473	0.157623	0.171404	0.115634	0.141536	0.146549	0.0239533	0.100495	0.107573	0.0876201	0.0966648	0.0980882	0.00831371	0.0898204	0.0898204	0.0756302	0.0823529	0.084406	0.00682787
	DSY5091	CEC709	0.196917	0.223121	0.163306	0.159274	0.185655	0.0301439	0.130003	0.125039	0.10662	0.123345	0.121252	0.0101553	0.168448	0.162162	0.0945589	0.10935	0.13363	0.0371591	0.136136	0.13496	0.0879912	0.0879912	0.11177	0.0274614
	DSY5093	CEC711	0.1685	0.221293	0.186014	0.26993	0.211434	0.0447531	0.0570305	0.0560472	0.074497	0.0918978	0.0698681	0.0169564	0.0750074	0.0738215	0.0709621	0.0779277	0.0744297	0.00288467	0.0629966	0.0595914	0.0621924	0.0639821	0.0621906	0.00188105
	DSY5094	CEC712	0.183456	0.164776	0.266129	0.271505	0.221467	0.0552486	0.0660767	0.0625369	0.134904	0.146324	0.10246	0.0443255	0.100963	0.102639	0.111642	0.123582	0.109707	0.0103708	0.0721584	0.0708812	0.0876857	0.0934356	0.0810402	0.0112531
	DSY5095	CEC716	0.14967	0.202435	0.177143	0.166386	0.173909	0.0221233	0.18254	0.174603	0.161677	0.170231	0.172263	0.00870418	0.19408	0.172553	0.165163	0.136017	0.166953	0.0239965	0.1658	0.160598	0.163992	0.1612	0.162897	0.00243496
	DSY5096	CEC7183	0.857801	1.1659	0.863423	0.880495	0.941905	0.149641	1.01584	1.02516	1.15499	1.12221	1.07955	0.0695886	0.98258	1.00581	0.832496	0.835846	0.914182	0.0928845	1.00335	0.991632	0.787159	0.751979	0.883529	0.132458
	DSY5097	CEC723	0.690667	0.786667	0.528024	0.421829	0.606796	0.163101	1.10989	1.37363	0.682051	0.671795	0.959341	0.343448	0.913458	0.905281	0.248521	0.332544	0.599951	0.358944	0.932399	1.40396	0.661964	0.619074	0.904349	0.360799
	DSY4752	DSY4752	1.1709	0.838337	1.25	1.14	1.09981	0.180365	1.16026	1.04487	1.06	0.93	1.04878	0.0942987	1.09452	1.05832	1.03	1.01	1.04821	0.0366899	0.979841	1.03238	0.99	1.12	1.03055	0.0638235
	DSY4758	DSY4758	0.688538	0.609486	0.72	0.65	0.667006	0.0478529	0.660245	0.632224	0.78	0.75	0.705617	0.0705875	0.787087	0.812716	0.81	0.72	0.782451	0.0431915	0.817886	0.830894	0.77	0.82	0.809695	0.0270702
	DSY4807	DSY4807	0.33	0.33	0.129959	0.135431	0.231347	0.113936	0.08	0.07	0.0400324	0.0400324	0.0575162	0.0205972	0.09	0.12	0.0659699	0.0685826	0.0861381	0.0250099	0.15	0.14	0.126543	0.12963	0.136543	0.0106588
	DSY4809	DSY4809	0.55	0.54	0.565362	0.568693	0.556014	0.0134258	0.26	0.26	0.385529	0.366234	0.317941	0.0673662	0.39	0.41	0.481482	0.515483	0.449241	0.0590953	0.54	0.52	0.541114	0.530504	0.532905	0.00983244
	SC5314	SC5314	0.400176	0.368514	0.38	0.36	0.377172	0.017388	0.431331	0.392704	0.09	0.09	0.251009	0.186584	0.119746	0.115517	0.08	0.08	0.0988158	0.0217951	0.131731	0.122115	0.31	0.31	0.218462	0.105772
	1A/B are biological replicates. 1/2 are technical replicates
	2Std Dev = Standard deviation of all TI replicates
	3Red boldface isolates have known mutations linked to an increased resistance to fluconazole summarized in the "aa substitutions" sheet

## Sheet: aa substitutions
				Amino acid substitutions
	Lab ID	CEC ID	FLC MIC (µg/ml)	Erg11	Tac1	Upc2	Reference
	DSY5096	CEC718	>256	Y132H, P236S, S405F	A736T	G657D
	NA	CEC4509	>256	R157K	H263Y, H838Y, C858Y
	NA	CEC4503	>256	R157K	H263Y, H838Y, C858Y
	NA	CEC4520	>256	Y132H, G45OE	H263Y, P971S
	NA	CEC4525	>256	Y64H, T123I, Y132H, R467I	H263Y, P971S	D654Nh
	NA	CEC4528	8	G448E	A737T, N823K, C858Y
	DSY296	NA	128	G464S	N977D
	hHeterozygous mutation

## Sheet: Data for Heat Map mod
			Mean TI
	Lab ID	CEC ID	pH 7.5	pH 7	pH 6	pH 4.5		TI (-)
	NA2	CEC45251	1.1225	1.0825	1.115	1.1225		0 - 0.19	0.2 - 0.49	0.5 - 0.79	0.8 - 1
	NA	CEC4509	1.0625	1.02	1.095	1.1075
	NA	CEC4528	0.81	0.76	1.155	1.09
	NA	CEC4520	1.05	1.0225	1.13	1.065
	DSY4752	DSY4752	1.09981	1.04878	1.04821	1.03055
	DSY5097	CEC723	0.606796	0.959341	0.599951	0.904349
	DSY5096	CEC718	0.941905	1.07955	0.914182	0.883529
	DSY4758	DSY4758	0.667006	0.705617	0.782451	0.79
	NA	CEC4503	1.11	1.1	1.09	0.7625
	DSY4809	DSY4809	0.556014	0.317941	0.449241	0.532905
	DSY2110	DSY2110	0.3	0.29	0.21	0.38
	DSY4588	DSY4588	0.15	0.32	0.29	0.51
	DSY4454	DSY4454	0.1	0.15	0.11	0.41
	DSY4754	DSY4754	0.5	0.49	0.17	0.52
	DSY4759	DSY4759	0.31	0.32	0.29	0.54
	DSY4452	DSY4452	0.13	0.4	0.3	0.48
	DSY4453	DSY4453	0.17	0.35	0.28	0.49
	DSY4585	DSY4585	0.14	0.31	0.34	0.51
	DSY4586	DSY4586	0.2	0.29	0.28	0.54
	DSY4487	DSY4487	0.22	0.41	0.34	0.52
	DSY2102	DSY2102	0.12	0.1	0.12	0.35
	DSY2103	DSY2103	0.11	0.12	0.1	0.29
	DSY2104	DSY2104	0.067	0.1	0.11	0.22
	DSY2105	DSY2105	0.1	0.13	0.11	0.31
	DSY2106	DSY2106	0.089	0.12	0.11	0.38
	DSY2107	DSY2107	0.12	0.33	0.16	0.37
	DSY2108	DSY2108	0.2	0.13	0.1	0.26
	DSY2109	DSY2109	0.12	0.13	0.11	0.37
	DSY296	DSY296	0.94	0.96	0.93	1
	DSY4807	DSY4807	0.022	0.025	0.02	0.015
	DSY4810	DSY4810	0.12	0.15	0.16	0.17
	DSY4751	DSY4751	0.11	0.059	0.066	0.46
	DSY4759	DSY4759	0.31	0.32	0.29	0.54
	NA	CEC1289	0.26	0.22	0.2575	0.5225
	NA	CEC3533	0.2625	0.1725	0.125	0.48
	NA	CEC2020	0.3275	0.155	0.1975	0.4675
	NA	CEC2019	0.16	0.155	0.2125	0.4025
	NA	CEC3537	0.195	0.085	0.1125	0.4
	NA	CEC3555	0.2325	0.15	0.1675	0.39
	NA	CEC3558	0.185	0.1825	0.2175	0.38
	NA	CEC3550	0.2125	0.1725	0.175	0.36
	NA	CEC2871	0.6	0.2775	0.185	0.335
	NA	CEC3596	0.145	0.17	0.135	0.33
	NA	CEC3531	0.145	0.1775	0.1925	0.315
	NA	CEC3540	0.125	0.14	0.125	0.315
	NA	CEC4501	0.2375	0.09	0.1125	0.31
	NA	CEC3549	0.2075	0.1775	0.125	0.305
	NA	CEC3600	0.1275	0.09	0.1625	0.3
	NA	CEC4514	0.3375	0.09	0.115	0.2925
	NA	CEC1427	0.125	0.1	0.125	0.2725
	NA	CEC3579	0.1175	0.13	0.125	0.27
	NA	CEC3559	0.125	0.0825	0.1025	0.265
	NA	CEC4502	0.1925	0.0775	0.095	0.2575
	NA	CEC3553	0.145	0.1075	0.1325	0.255
	NA	CEC2023	0.155	0.055	0.09	0.2525
	NA	CEC3597	0.3275	0.1225	0.1575	0.2375
	NA	CEC2018	0.135	0.0575	0.095	0.2375
	NA	CEC3532	0.27	0.075	0.11	0.235
	NA	CEC2876	0.16	0.1175	0.155	0.235
	NA	CEC4218	0.15	0.075	0.1125	0.2325
	NA	CEC3554	0.1525	0.115	0.1475	0.23
	NA	CEC3535	0.1325	0.0925	0.1275	0.225
	NA	CEC3556	0.1075	0.0875	0.11	0.225
	NA	CEC3536	0.1075	0.1125	0.11	0.2225
	NA	CEC3617	0.145	0.0975	0.095	0.2225
	SC5314	SC5314	0.377172	0.251009	0.0988158	0.218462
	NA	CEC4526	0.15	0.085	0.1425	0.2125
	NA	CEC2872	0.2025	0.11	0.1475	0.2125
	NA	CEC3616	0.385	0.2225	0.17	0.21
	NA	CEC3548	0.1975	0.085	0.1	0.205
	DSY5053	CEC3711	0.243601	0.401217	0.280244	0.203208
	NA	CEC1426	0.1475	0.0875	0.105	0.2025
	NA	CEC3626	0.3175	0.0925	0.105	0.1975
	NA	CEC3607	0.1325	0.0925	0.12	0.195
	NA	CEC1492	0.2325	0.0975	0.165	0.1925
	NA	CEC3557	0.1775	0.06	0.0925	0.1925
	NA	CEC2021	0.15	0.08	0.115	0.19
	NA	CEC3541	0.1325	0.065	0.105	0.1875
	NA	CEC2022	0.1425	0.075	0.1375	0.185
	DSY5069	CEC4259	0.242407	0.184105	0.182638	0.177538
	NA	CEC3627	0.12	0.0675	0.09	0.1775
	DSY5055	CEC3715	0.252718	0.183335	0.18207	0.17529
	NA	CEC3551	0.165	0.1225	0.11	0.175
	NA	CEC3603	0.3	0.08	0.065	0.1725
	NA	CEC3613	0.09	0.125	0.1275	0.17
	DSY5050	CEC3706	0.271214	0.209822	0.229952	0.16882
	NA	CEC3615	0.15	0.1625	0.125	0.1675
	DSY5095	CEC716	0.173909	0.172263	0.166953	0.162897
	NA	CEC3529	0.33	0.1025	0.0725	0.1625
	NA	CEC3602	0.095	0.0975	0.105	0.1575
	NA	CEC4549	0.1025	0.06	0.105	0.155
	DSY5058	CEC4032	0.221661	0.184132	0.137115	0.154489
	NA	CEC1424	0.115	0.08	0.1175	0.1525
	DSY5074	CEC4482	0.231577	0.23496	0.208891	0.150757
	DSY5021	CEC3560	0.153022	0.223222	0.146067	0.147059
	DSY5072	CEC4480	0.396562	0.368699	0.155544	0.141057
	DSY5078	CEC4487	0.177695	0.14398	0.165677	0.140393
	NA	CEC3637	0.2525	0.065	0.07	0.14
	NA	CEC3530	0.125	0.06	0.095	0.1375
	NA	CEC4217	0.31	0.095	0.07	0.1375
	DSY4807	DSY4807	0.231347	0.0575162	0.0861381	0.136543
	DSY5063	CEC4104	0.10633	0.116667	0.124118	0.13542
	DSY5082	CEC4493	0.112845	0.133535	0.15246	0.133209
	NA	CEC3605	0.1275	0.0625	0.0725	0.1325
	DSY5062	CEC4103	0.120365	0.131289	0.124711	0.13071
	DSY5048	CEC3686	0.155527	0.142533	0.13266	0.1279
	DSY5032	CEC3665	0.198271	0.129747	0.124457	0.123869
	NA	CEC3544	0.27	0.1225	0.0675	0.1225
	NA	CEC3494	0.1675	0.0675	0.0725	0.1225
	DSY5056	CEC3716	0.148627	0.101788	0.115599	0.122109
	DSY5059	CEC4035	0.269382	0.215559	0.136113	0.12201
	NA	CEC3612	0.1125	0.1975	0.1375	0.12
	NA	CEC3618	0.1325	0.0725	0.0725	0.12
	NA	CEC3609	0.13	0.08	0.085	0.12
	DSY5027	CEC3660	0.21229	0.137092	0.152069	0.119792
	NA	CEC3629	0.3225	0.0775	0.085	0.1175
	NA	CEC3534	0.12	0.0675	0.08	0.1125
	DSY5091	CEC709	0.185655	0.121252	0.13363	0.11177
	DSY5066	CEC4108	0.234375	0.28096	0.103764	0.109382
	NA	CEC3631	0.1775	0.055	0.0675	0.1075
	NA	CEC3610	0.1525	0.1025	0.0725	0.1075
	DSY5080	CEC4489	0.152302	0.159229	0.14304	0.106499
	DSY5034	CEC3669	0.156766	0.124497	0.147535	0.106465
	DSY5085	CEC4496	0.20599	0.159784	0.124532	0.105772
	DSY5088	CEC4499	0.169408	0.118485	0.126749	0.105571
	NA	CEC3547	0.345	0.075	0.065	0.105
	DSY5047	CEC3685	0.139505	0.119718	0.115809	0.104957
	DSY5025	CEC3658	0.0973646	0.090353	0.0930752	0.103958
	DSY5061	CEC4039	0.184659	0.131316	0.115989	0.103463
	DSY5086	CEC4497	0.172984	0.123818	0.11922	0.102162
	DSY5046	CEC3683	0.134855	0.115417	0.117222	0.101222
	DSY5067	CEC4254	0.16074	0.134661	0.127069	0.100515
	DSY5089	CEC4500	0.533323	0.461419	0.121935	0.100224
	DSY5030	CEC3663	0.102311	0.0955735	0.120682	0.0995288
	NA	CEC3601	0.135	0.0525	0.06	0.0975
	DSY5064	CEC4106	0.295537	0.291967	0.102683	0.0962989
	DSY5026	CEC3659	0.107497	0.0918471	0.107607	0.095364
	DSY5039	CEC3675	0.162883	0.12035	0.106697	0.0952912
	DSY5054	CEC3712	0.117089	0.115919	0.122226	0.0949489
	DSY5065	CEC4107	0.24308	0.247324	0.0972758	0.0944698
	DSY5044	CEC3681	0.154548	0.101343	0.105629	0.0940048
	DSY5073	CEC4481	0.164902	0.111795	0.108286	0.0929006
	DSY5087	CEC4498	0.256552	0.128006	0.115838	0.0925409
	NA	CEC3622	0.365	0.1075	0.0575	0.0925
	NA	CEC3611	0.055	0.075	0.06	0.0925
	DSY5052	CEC3708	0.101186	0.11407	0.1051	0.0920297
	DSY5041	CEC3678	0.212716	0.175193	0.108651	0.0915267
	NA	CEC3623-3	0.08	0.0775	0.0625	0.09
	DSY5071	CEC4479	0.126054	0.117886	0.0970097	0.0894834
	DSY5070	CEC4261	0.247342	0.223543	0.101227	0.0856455
	NA	CEC3561	0.1925	0.045	0.0525	0.085
	DSY5092	CEC708	0.208414	0.146549	0.0980882	0.084406
	DSY5045	CEC3682	0.358058	0.164992	0.0848509	0.0841968
	DSY5060	CEC4038	0.188393	0.100925	0.0988295	0.0840608
	DSY5024	CEC3638	0.129708	0.108185	0.102501	0.0834135
	DSY5081	CEC4492	0.107997	0.131223	0.112998	0.0827065
	DSY5077	CEC4485	0.325391	0.172312	0.108903	0.0825899
	DSY5049	CEC3704	0.151856	0.165393	0.0917643	0.0816637
	DSY5031	CEC3664	0.117058	0.0820686	0.104472	0.0815967
	DSY5028	CEC3661	0.191878	0.136779	0.112135	0.081484
	DSY5094	CEC712	0.221467	0.10246	0.109707	0.0810402
	NA	CEC3614	0.095	0.155	0.1125	0.08
	DSY5043	CEC3680	0.108006	0.113884	0.0931813	0.0781249
	DSY5051	CEC3707	0.200294	0.123099	0.086755	0.0756606
	DSY5090	CEC704	0.110231	0.083343	0.0910798	0.0755187
	DSY5057	CEC3786	0.33858	0.286265	0.0960538	0.0751475
	DSY5040	CEC3676	0.105663	0.0732246	0.0813651	0.0725585
	DSY5035	CEC3671	0.098723	0.086432	0.078229	0.0712619
	DSY5036	CEC3672	0.174389	0.177149	0.0836132	0.0698326
	DSY5037	CEC3673	0.0781189	0.04986	0.0832343	0.0697449
	DSY5033	CEC3668	0.120702	0.0626319	0.055194	0.0667406
	DSY5068	CEC4256	0.118956	0.0707071	0.0706352	0.0633253
	DSY5093	CEC711	0.211434	0.0698681	0.0744297	0.0621906
	DSY5029	CEC3662	0.169536	0.093317	0.0828747	0.0621842
	DSY5076	CEC4486	0.101674	0.0806503	0.0779132	0.0603361
	NA	CEC3619	0.255	0.095	0.045	0.06
	DSY5038	CEC3674	0.0988753	0.0947167	0.0645629	0.0581551
	DSY5023	CEC3636	0.11249	0.0592416	0.0782192	0.0557361
	DSY5079	CEC4488	0.175712	0.0706198	0.0546693	0.0555049
	DSY5042	CEC3679	0.103784	0.10429	0.070842	0.0509357
	DSY5022	CEC3634	0.351255	0.243045	0.048537	0.0395894
	1Red boldface isolates have known mutations linked to an increased resistance to fluconazole summarized in the "aa substitutions" sheet
	2 NA: not available
