# Supplementary material for: Identification and Characterization of Mediators of Fluconazole Tolerance in Candida albicans
Source: Front Microbiol. 2020 Nov 11;11:591140. doi: 10.3389/fmicb.2020.591140 (PMC7686038; doi:10.3389/fmicb.2020.591140)
Supplement: Supplementary file 5 [file Data_Sheet_5.XLSX]

## Sheet: All data
			Relative growth (% GC)		Ratio
	orf19 n°	Gene name	D-F+	D+F+	(D+F+)/(D-F+)	Description
	orf19.2842	GZF3	12.4425	26.3471	2.14425	GATA-type transcription factor; oxidative stress-induced via Cap1; mutant has abnormal colony morphology and altered sensitivity to fluconazole, LiCl, and copper; Spider biofilm induced
	orf19.4401	YVH1	9.66662	19.8169	2.05189	Putative dual specificity phosphatase (phosphoserine/threonine and phosphotyrosine phosphatase); required for wild-type growth rate and for wild-type virulence in mouse model of systemic infection; Hap43p-induced gene
	orf19.2538	PTC2	12.7548	25.425	2.01979	Protein phosphatase of the Type 2C-related family (serine/threonine-specific) with a potential role in DNA damage checkpoint control; localizes to both cytoplasm and mitochondria; mutant shows virulence defect
	orf19.7001	YCK2	14.0341	28.2371	2.00768	Plasma membrane protein similar to S. cerevisiae casein kinase I, Yck2p; null mutant has defect in damaging oral epithelial cells and in hyphal branching; transcription is activated in weak acid stress or on contact with host cells
	orf19.3356	ESP1	11.319	22.3404	1.9742	Putative caspase-like cysteine protease; mutation confers increased sensitivity to nocodazole; periodic mRNA expression, peak at cell-cycle S/G2 phase; mRNA binds She3
	orf19.5144	PGA28	11.6106	22.8729	1.96518	Protein similar to S. cerevisiae Wsc2p, which has roles in stress- and cell-wall-related processes; predicted Kex2p substrate; putative GPI-anchored adhesin-like protein
	orf19.6792	RRD1	13.1735	25.834	1.95795	Putative peptidyl-prolyl cis/trans-isomerase; caspofungin induced
	orf19.799	STE4	13.0553	25.4163	1.95313	Beta subunit of heterotrimeric G protein of mating signal transduction pathway; required for mating; transcript is specific to cells homozygous at MTL; induced by alpha pheromone; ortholog of S. cerevisiae Ste4
	orf19.5636	RBT5	10.3613	20.0897	1.94334	GPI-linked cell wall protein; hemoglobin utilization; Rfg1, Rim101, Tbf1, Fe regulated; Sfu1, Hog1, Tup1, serum, alkaline pH, antifungal drugs, geldamycin repressed; Hap43 induced; required for RPMI biofilms; Spider biofilm induced
	orf19.5257	LCB4	14.5716	27.5796	1.93985	Putative sphingosine kinase; Tac1p-regulated expression; rat catheter biofilm induced
	orf19.229	NA	16.212	30.1184	1.93645	Ortholog(s) have ubiquitin-protein ligase activity, role in protein ubiquitination involved in ubiquitin-dependent protein catabolic process and chromosome, centromeric region, mitotic spindle pole body, nucleus localization
	orf19.1757	NA	14.9843	28.2213	1.92949	Putative C2H2 transcription factor; expression upregulated in clinical isolates from HIV+ patients with oral candidiasis; Spider biofilm induced
	orf19.5253	NA	14.2503	26.7736	1.90857	Has domain(s) with predicted ATP binding, protein tyrosine kinase activity and role in protein phosphorylation
	orf19.5408	HRK1	14.8512	28.2518	1.90394	Putative serine/threonine kinase; predicted role in cellular ion homeostasis; Spider biofilm repressed
	orf19.5953	NA	15.9949	30.2248	1.89575	C2H2 transcription factor; predicted regulator of ribosomal protein and biogenesis genes; possibly essential, disruptants not obtained by UAU1 method; rat catheter biofilm induced
	orf19.6302	PGA39	11.0353	20.7989	1.8883	Putative GPI-anchored protein
	orf19.1690	TOS1	10.8412	20.4591	1.88784	Protein similar to alpha agglutinin anchor subunit; secreted; exogenously expressed protein is a substrate for Kex2 processing in vitro; fluconazole-induced; induced by alpha pheromone in SpiderM medium; Hap43-induced
	orf19.2014	BCY1	13.8164	26.0452	1.8872	Protein kinase A regulatory subunit; required for nuclear localization of Tpk1; physically interacts with Tpk1; essential; apoptosis-regulated; bcy1 heterozygous or bcy1 tpk2 mutant has filamentous growth defect
	orf19.7414	ALS6	11.9477	22.5155	1.88113	ALS family protein; expression in S. cerevisiae confers adhesion to gelatin; macrophage-induced gene; N-terminal adhesion domain; ALS family includes cell-surface glycoproteins, some with adhesin function
	orf19.4728	NA	11.8692	22.1143	1.87938	Ortholog(s) have role in histone deacetylation, negative regulation of meiosis and Set3 complex localization
	orf19.3083	NA	13.6933	25.6568	1.87704	Putative lipid phosphatase of the endoplasmic reticulum; role in DNA repair, actin cytoskeleton organization, cellular manganese ion homeostasis; Spider biofilm repressed
	orf19.5734	POP2	13.5111	24.7393	1.8703	Component of the Ccr4-Pop2 mRNA deadenylase; heterozygous null mutant exhibits resistance to parnafungin and cordycepin in the C. albicans fitness test
	orf19.7234	NA	14.4077	26.9192	1.86452	Putative RSC chromatin remodeling complex component; possibly an essential gene, disruptants not obtained by UAU1 method
	orf19.3178	NA	15.1953	28.1647	1.86449	Ortholog(s) have RNA binding activity, role in mRNA splicing, via spliceosome and U2-type prespliceosome localization
	orf19.1314	NA	15.606	29.1235	1.86412	Protein of unknown function; planktonic growth-induced gene
	orf19.2614	RSR1	11.0729	20.6218	1.86313	RAS-related protein; GTP/GDP cycling required for wild-type polar bud site selection, hyphal growth guidance; role in systemic virulence in mouse; geranylgeranylation predicted; suppresses S. cerevisiae cdc24-4 mutant heat sensitivity
	orf19.2174	RAD57	10.9601	20.3394	1.85884	Putative DNA recombination and repair protein; induced by interaction with macrophage; transcript is regulated by Nrg1, Mig1, and Tup1; essential protein; S. cerevisiae ortholog is essential
	orf19.726	PPZ1	13.1895	24.3149	1.857	Protein phosphatase Z; type 1 family serine/threonine specific protein phosphatase involved in cation homeostasis and cell wall integrity
	orf19.4015	CAG1	13.2247	24.3176	1.85251	heterotrimeric G protein alpha subunit; positive role in mating pheromone response; opaque-enriched transcript; transcript repressed by MTLa1-MTLalpha2; regulated by hemoglobin-responsive Hbr1 via MTL genes; rat catheter biofilm repressed
	orf19.4347	NA	12.8477	23.7514	1.85176	Putative serine/threonine protein kinase; Hog1p-induced
	orf19.3049	NA	14.0554	25.8123	1.84737	Ortholog(s) have protein kinase activity, role in activation of bipolar cell growth, ascospore wall assembly, protein phosphorylation and cell division site, cytosol, nucleus, prospore membrane localization
	orf19.1565	NA	13.3647	24.5902	1.84702	Protein of unknown function
	orf19.7195	RAD6	10.6035	19.6198	1.84598	Functional ortholog of S. cerevisiae Rad6; negative regulator of hyphal growth; required for wild-type UV resistance; acts in pathway with Efg1; ; transcript is UV-induced, slightly repressed during hyphal growth; gene has two introns
	orf19.4752	MSN4	9.95478	18.3648	1.8455	Zinc finger transcription factor; similar to S. cerevisiae Msn4, but not a significant stress response regulator in C. albicans; partly complements STRE-activation defect of S. cerevisiae msn2 msn4 double mutant; flow model biofilm induced
	orf19.6821	NA	10.6343	19.6097	1.84413	Ortholog(s) have ubiquitin-protein ligase activity
	orf19.3561	CDC7	16.0818	29.5687	1.84269	Putative kinase; cell-cycle regulated periodic mRNA expression; S. cerevisiae ortholog is not cell-cycle regulated; possibly an essential gene, disruptants not obtained by UAU1 method
	orf19.7359	CRZ1	14.3949	26.2855	1.83738	Calcineurin-regulated C2H2 transcription factor; role in maintenance of membrane integrity, azole tolerance; not required for mouse virulence; repressed by low iron; regulates Ca++ influx during alkaline pH response; Spider biofilm induced
	orf19.505	SRV2	15.5364	28.2174	1.83703	Adenylate cyclase-associated protein; regulates adenylate cyclase activity; required for wild-type germ tube formation and for virulence in mice; mutant defects in filamentous growth are rescued by cAMP or dbcAMP; Spider biofilm repressed
	orf19.4000	GRF10	16.121	29.458	1.83477	Putative homeodomain transcription factor; null mutant is an adenine auxotroph; Spider biofilm induced; promoter bound by Bcr1, Tec1, Efg1, Ndt80 and Brg1
	orf19.2447	NA	13.9981	25.6804	1.83436	Putative Type II phosphatidylinositol 4-kinase; Ssr1-repressed; flow model biofilm repressed
	orf19.4151	SPO1	9.89476	18.0794	1.8334	Protein similar to phospholipase B; fungal-specific (no human or murine homolog)
	orf19.3207	CCN1	14.7261	26.8849	1.83258	G1 cyclin; required for hyphal growth maintenance (not initiation); cell-cycle regulated transcription (G1/S); Cdc28p-Ccn1p initiates Cdc11p S394 phosphorylation on hyphal induction; expression in S. cerevisiae inhibits pheromone response
	orf19.2451	PGA45	11.3072	20.5572	1.83065	Putative GPI-anchored cell wall protein; repressed in core caspofungin response; Hog1-induced; regulated by Ssn6; Mob2-dependent hyphal regulation; flow model biofilm induced
	orf19.2713	NA	11.1482	20.329	1.82722
	orf19.1714	PGA44	11.4575	20.8795	1.82437	Putative GPI-anchored protein
	orf19.5380	LYS144	10.8585	19.9467	1.82256	Zn(II)2Cys6 transcription factor; has similarity to S. cerevisiae Lys14, involved in the regulation of lysine biosynthesis genes
	orf19.6851	CHL4	12.7044	22.9549	1.81955	Protein described as having role in chromosome segregation; RNA abundance regulated by tyrosol and cell density
	orf19.696	STE2	16.1433	29.1293	1.81852	Receptor for alpha factor mating pheromone, MFalpha; required for a-type cells to respond to alpha factor, for opaque a-form mating and white a-form response; possible Kex2p substrate; a-specific, alpha-factor induced, A1p-Alpha2p repressed
	orf19.2324	UBA4	14.3059	26.0086	1.81743	Putative ubiquitin activating protein; Hap43-repressed; induced by prostaglandins; clade-associated gene expression
	orf19.1697	NA	11.7866	20.8364	1.81573	Ortholog(s) have role in cytoplasmic translation and cytoplasm, polysomal ribosome localization
	orf19.4361	IFF3	10.6264	19.284	1.8139	Putative GPI-anchored protein
	orf19.794	SSN3	13.8171	25.0718	1.81321	Putative cyclin-dependent protein kinase; mutants are sensitive to growth on H2O2 medium
	orf19.5911	CMK1	14.3128	25.9382	1.81171	Putative calcium/calmodulin-dependent protein kinase II; expression regulated upon white-opaque switching; biochemically purified Ca2+/CaM-dependent kinase is soluble, cytosolic, monomeric, and serine-autophosphorylated; Hap43p-repressed
	orf19.124	CIC1	15.1407	27.4031	1.8093	Putative proteasome-interacting protein; rat catheter biofilm induced
	orf19.5676	NA	13.8057	24.9896	1.80843	Ortholog(s) have cytosol, nucleus localization
	orf19.4979	KNS1	13.7939	24.9064	1.80818	Protein kinase involved in negative regulation of PolIII transcription; effector kinase of the TOR signaling pathway, phosphorylates Rpc53p to regulate ribosome and tRNA biosynthesis; Spider and flow model biofilm induced
	orf19.4367	SMC1	11.3906	20.5405	1.80817	Protein similar to chromosomal ATPases; RNA abundance regulated by tyrosol and cell density; cell-cycle regulated periodic mRNA expression
	orf19.6321	PGA48	10.752	18.611	1.8076	Putative GPI-anchored adhesin-like protein; similar to S. cerevisiae Spi1p, which is induced at stationary phase; transcript induced in high iron; flow model biofilm induced; Spider biofilm repressed
	orf19.3231	CDC27	11.4062	20.5834	1.80416	Putative ubiquitin-protein ligase; periodic mRNA expression, peak at cell-cycle S/G2 phase
	orf19.1754	CMK2	13.5564	24.3738	1.80173	Putative calmodulin-dependent protein kinase; involved in cell wall integrity and oxidative stress response
	orf19.1217	NA	10.1726	18.3668	1.79858	Ortholog(s) have ribosome binding, ubiquitin-protein ligase activity and role in chromatin modification, chromatin silencing at telomere, protein ubiquitination, ribosome-associated ubiquitin-dependent protein catabolic process
	orf19.1671	UTR2	11.5213	20.8003	1.79855	Putative GPI anchored cell wall glycosidase; role in adhesion, hyphal growth on Spider (not serum) medium; chitin-binding, glycosyl hydrolase domains; induced during cell wall regeneration; mRNA in yeast-form cells; Spider biofilm induced
	orf19.4255	ECM331	11.9597	20.8856	1.79592	GPI-anchored protein; mainly at plasma membrane, also at cell wall; Hap43, caspofungin-induced; Plc1-regulated; Hog1, Rim101-repressed; colony morphology-related regulated by Ssn6; induced by ketoconazole and hypoxia
	orf19.1803	CDC43	15.0634	26.9386	1.79505	Beta subunit of heterodimeric protein geranylgeranyltransferase type I; GGTase I enzyme binds zinc, is Mg-dependent; Cdc42p is GGTase I substrate
	orf19.3534	RHO3	14.3588	25.7499	1.7948	Putative Rho family GTPase; possible substrate of protein farnesyltransferase and geranylgeranyltransferase type I; greater transcription in hyphal form than yeast form; plasma membrane-localized
	orf19.6889	MKK2	14.3333	25.8349	1.79431	Ortholog of S. cerevisiae Mkk2; MAP kinase kinase involved in signal transduction; macrophage-downregulated; mutants are viable and hypersensitive to caspofungin
	orf19.35	NA	10.4405	18.7785	1.79277	Predicted kinase; rat catheter, flow model, Spider biofilm induced
	orf19.6033	CMP1	13.3076	23.8921	1.79052	Catalytic subunit of calcineurin (Ca[2+]-calmodulin-regulated S/T protein phosphatase); required for wild-type virulence, resistance to high pH, Na(+), Li(+), Mn(2+), and fluconazole tolerance; micafungin is fungicidal to null mutant
	orf19.5338	GAL4	11.4074	20.4042	1.79003	Zn(II)2Cys6 transcription factor; involved in control of glycolysis; ortholog of S. cerevisiae Gal4, but not involved in regulation of galactose utilization genes; caspofungin repressed; Spider biofilm repressed
	orf19.2222	NA	15.813	27.2449	1.78974	Putative casein kinase; plasma membrane-localized
	orf19.6980	NA	14.6964	26.2974	1.78858	Has domain(s) with predicted ATP binding, protein tyrosine kinase activity and role in protein phosphorylation
	orf19.4014	NA	13.1481	23.4768	1.78838	Planktonic growth-induced gene
	orf19.1589	NA	15.6453	27.7097	1.78739	Putative transcription factor component of the core factor (CF) rDNA transcription factor complex; Spider biofilm induced
	orf19.2410	NA	10.3259	18.3071	1.78664
	orf19.6928	SAP9	11.1715	19.9926	1.78493	Secreted aspartyl protease; roles in adhesion, cell surface integrity; induced by antifungal drugs, stationary phase, or in white-phase cells; farnesol-downregulated in biofilm; autocatalytic processing; GPI-anchor; Spider biofilm induced
	orf19.366	NA	13.4176	23.8264	1.7849	Ortholog(s) have double-stranded DNA binding activity, role in DNA damage checkpoint, double-strand break repair, reciprocal meiotic recombination and checkpoint clamp complex localization
	orf19.217	NA	13.2362	23.41	1.78428	Ortholog(s) have sequence-specific DNA binding activity
	orf19.3018	SPP1	13.8709	24.7408	1.7833	Putative histone methyltransferase; induced by nitric oxide independent of Yhb1p; cell-cycle regulated periodic mRNA expression
	orf19.2678	BUB1	10.4002	18.3217	1.78282	Putative cell cycle checkpoint kinase; mutation confers increased sensitivity to nocodazole
	orf19.3895	CHT2	10.4232	18.5411	1.78211	GPI-linked chitinase; required for normal filamentous growth; repressed in core caspofungin response; fluconazole, Cyr1, Efg1, pH-regulated; mRNA binds She3 and is localized to yeast-form buds and hyphal tips; Spider biofilm repressed
	orf19.793	CAK1	11.163	19.8645	1.77843	Monomeric CDK-activating kinase; functional homolog of S. cerevisiae Cak1p; phosphorylates cyclin-free human CDK2; lacks glycine loop motif; conserved lysine (K36) not required for activity; possibly essential gene (by UAU1 method)
	orf19.5995	MCA1	14.6818	26.0765	1.77643	Putative cysteine protease with similarity to S. cerevisiae Mca1p; has a role in apoptotic cell death upon H2O2 treatment; fungal-specific (no human or murine homolog); farnesol-induced
	orf19.207	PGA55	11.3851	19.8514	1.77502	GPI-anchored adhesin-like protein; filament induced; regulated by Nrg1, Tup1; regulated upon hyphal formation; mRNA binds to She3 and is localized to yeast-form buds and hyphal tips; induced during chlamydospore formation
	orf19.5722	NA	18.6021	32.5275	1.77481	Ortholog(s) have DNA binding activity
	orf19.7317	UGA33	14.533	25.66	1.77475	Zinc-finger transcription factor; similar to S. cerevisiae Uga3 which regulates gamma-aminobutyrate metabolism gene expression; required for yeast cell adherence to silicone substrate; rat catheter biofilm induced
	orf19.7663	NA	12.242	21.7419	1.77456	Ortholog(s) have role in homologous chromosome segregation, protein localization to nucleolar rDNA repeats, rDNA condensation and monopolin complex, nuclear envelope, nucleolus localization
	orf19.1577	NA	14.4811	25.6425	1.77433	Has domain(s) with predicted sequence-specific DNA binding, sequence-specific DNA binding transcription factor activity, zinc ion binding activity and role in regulation of transcription, DNA-dependent
	orf19.536	NA	9.55893	16.9449	1.77352	Ortholog(s) have chromatin binding, protein complex scaffold, ubiquitin binding activity and role in histone acetylation, transcription from RNA polymerase II promoter
	orf19.1476	NA	10.3201	18.1722	1.7732	Ortholog(s) have mRNA (N6-adenosine)-methyltransferase activity, role in mRNA methylation, meiosis, negative regulation of pseudohyphal growth and MIS complex localization
	orf19.5429	NA	13.786	24.2931	1.7727	Ortholog(s) have DNA replication origin binding, ubiquitin-protein ligase activity
	orf19.2399	NA	13.8055	24.4269	1.7711	Putative transcription factor with zinc finger DNA-binding motif; similar to bacterial DnaJ; induced in low iron
	orf19.1253	PHO4	16.4594	28.884	1.77094	bHLH transcription factor of the myc-family; required for growth in medium lacking phosphate and for resistance to copper and Phloxine B; induced by Mnl1 under weak acid stress
	orf19.7609	PGA11	9.61013	17.1286	1.77066	Putative GPI-anchored protein
	orf19.2685	PGA54	11.4259	19.2223	1.77012	GPI-anchored protein; Hog1-repressed; induced in cyr1 or efg1 mutant or in hyphae; colony morphology-related gene regulation by Ssn6; induced in RHE model; mRNA binds She3; regulated in Spider biofilms by Tec1, Egf1, Ntd80, Rob1, Brg1
	orf19.723	BCR1	11.0387	19.5121	1.76944	Transcription factor; regulates a/alpha biofilm formation, matrix, cell-surface-associated genes; confers adherence, impermeability, impenetrability, fluconazole resistance; Tup1/Tec1/Mnl1-regulated; mRNA binds She3; Spider biofilm induced
	orf19.6594	PLB3	11.5985	20.0161	1.76915	GPI-anchored cell surface phospholipase B; possibly secreted; fungal-specific (no mammalian homolog); induced by Tbf1; fluconazole-induced; possible essential gene (UAU1 method); Spider and flow model biofilm induced
	orf19.3530	CKA2	11.2247	18.8279	1.76753	Catalytic alpha-subunit of protein kinase CK2; interaction with calcineurin pathway affects fluconazole sensitivity; synthetically lethal with CKA1; attenuated virulence in a mouse oropharyngeal candidiasis but not in a systemic mouse model
	orf19.4062	TRY2	11.1874	19.6992	1.76706	Transcription factor; regulator of yeast form adherence; required for yeast cell adherence to silicone substrate; Spider biofilm induced
	orf19.1699	BZZ1	14.5319	25.5535	1.76672	Protein similar to S. cerevisiae Bzz1p, which is an SH3 domain protein involved in the regulation of actin polymerization
	orf19.4767	ZCF28	11.8095	20.7854	1.76662	Zn(II)2Cys6 transcription factor; required for yeast cell adherence to silicone substrate; Spider biofilm induced
	orf19.5954	NA	11.1482	19.5492	1.76546	Ortholog(s) have enzyme activator activity, role in ascospore wall assembly, meiosis I, positive regulation of protein catabolic process and anaphase-promoting complex localization
	orf19.3912	GLN3	17.5192	31.5903	1.76546	GATA transcription factor, involved in regulation of nitrogen starvation-induced filamentous growth; regulates transcription of Mep2 ammonium permease; regulated by Gcn2 and Gcn4; mRNA binds She3; Spider biofilm induced
	orf19.1824	PGA50	11.6363	20.2524	1.76492	Putative GPI-anchored protein; adhesin-like protein
	orf19.4534	NA	15.3264	26.8877	1.76388	Putative UBX-domain (ubiquitin-regulatory domain) protein; macrophage-downregulated gene
	orf19.1341	PRR2	11.1881	19.735	1.76377	Putative serine/threonine protein kinase; mutation confers resistance to 5-fluorocytosine (5-FC)
	orf19.6514	CUP9	10.6376	18.7613	1.76362	Transcription factor; represses SOK1 expression in response to farnesol inhibition; yeast-hypha switch repressed; ketoconazole-induced; Plc1-regulated; colony morphology-related Ssn6 regulation; Spider, flow model biofilm induced
	orf19.7388	PBS2	15.3176	26.9739	1.76258	MAPK kinase (MAPKK); role in osmotic and oxidative stress responses, oxidative stress adaptation; required for stress regulation of Hog1p localization and activity; functional homolog of S. cerevisiae Pbs2p
	orf19.1220	RVS167	20.7986	36.6453	1.76094	SH3-domain- and BAR domain-containing protein involved in endocytosis; null mutant exhibits defects in hyphal growth, virulence, cell wall integrity, and actin patch localization; cosediments with phosphorylated Myo5p
	orf19.2268	RCK2	14.1899	24.8751	1.76045	Predicted MAP kinase-activated protein kinase, similar to S. cerevisiae serine/threonine protein kinase Rck2p; induced by osmotic stress via Hog1p; macrophage/pseudohyphal-repressed; mutants are sensitive to rapamycin
	orf19.2791	BBC1	10.4557	18.4126	1.7598	Putative SH3-domain-containing protein
	orf19.5531	CDC37	13.5936	23.8684	1.75895	Chaperone for Crk1p; interacts with Crk1p kinase domain and with Sti1p; putative phosphorylation site at Ser14; functional homolog of S. cerevisiae Cdc37p; likely to be essential for growth; regulated by Gcn2p and Gcn4p
	orf19.7355	SSN8	9.87088	17.353	1.75821	Ortholog of S. cerevisiae Ssn8; a component of RNA polymerase II holoenzyme; mutants are viable and are sensitive to hydrogen peroxide medium
	orf19.2119	NDT80	13.2424	23.1837	1.7577	Ortholog of Ndt80; meiosis-specific transcription factor; activator of CDR1 induction by antifungal drugs; required for wild-type drug resistance and for Spider biofilm formation; transcript induced by antifungal drug treatment
	orf19.245	DDC1	12.8401	22.7411	1.75732	Putative DNA damage checkpoint protein; transcript induced during filamentous growth; regulated by Nrg1, Tup1
	orf19.384	NA	13.848	24.1616	1.75603	Ortholog(s) have Golgi apparatus, cytosol, nucleus localization
	orf19.895	HOG1	14.1795	24.9202	1.75573	MAP kinase of osmotic-, heavy metal-, and core stress response; role in regulation of glycerol, D-arabitol in response to stress; phosphorylated in response to H2O2 (Ssk1-dependent) or NaCl; mutant induces protective mouse immune response
	orf19.5548	LYS14	14.5434	25.3755	1.75548	Zn(II)2Cys6 transcription factor; has similarity to S. cerevisiae Lys14, which is a transcription factor involved in the regulation of lysine biosynthesis genes
	orf19.1619	NA	14.632	25.6132	1.7552	Putative kinase subunit of RNA polymerase II carboxy-terminal domain kinase I; possibly an essential gene, disruptants not obtained by UAU1 method
	orf19.3638	PGA46	11.4793	20.0106	1.75514	Putative GPI-anchored protein; secreted; fluconazole-induced
	orf19.5537	WSC2	13.0734	22.9664	1.75412	Putative cell wall integrity and stress response protein; mRNA binds She3; Spider biofilm induced
	orf19.3809	BAS1	10.4308	18.2387	1.75398	Putative Myb-like transcription factor; ortholog S. cerevisiae Bas1, a regulator of purine biosynthetic genes; mutant exhibits adenine auxotrophy and abnormal colony morphology
	orf19.6506	NA	13.19	23.1362	1.75283	Ortholog(s) have role in histone deacetylation, negative regulation of antisense RNA transcription, regulation of DNA-dependent DNA replication initiation, transcription elongation from RNA polymerase II promoter
	orf19.1636	STE50	15.6582	27.3403	1.75204	Protein with sterile alpha motif (SAM) and Ras-associated domain (RAD); similar to S. cerevisiae Rad50p, which is involved in signal transduction via interaction with and regulation of MAPKKK
	orf19.3642	SUN41	14.9322	25.1965	1.75127	Cell wall glycosidase; role in biofilm formation and cell separation; possibly secreted; hypoxia, hyphal induced; caspofungin repressed; Efg1, Cph1 regulated; O-glycosylated, possible Kex2 substrate; 5'-UTR intron; Spider biofilm induced
	orf19.2886	CEK1	12.7959	22.382	1.75024	ERK-family protein kinase; required for wild-type yeast-hypha switch, mating efficiency, virulence in mice; Cst20-Hst7-Cek1-Cph1 MAPK pathway regulates mating, and invasive hyphal growth under some conditions; Spider biofilm induced
	orf19.3405	ZCF18	15.0303	25.9472	1.74822	Putative Zn(II)2Cys6 transcription factor; heterozygous null mutant displays sensitivity to virgineone and decreased colonization of mouse kidneys
	mtlalpha2	MTLALPHA2	10.67	18.6556	1.74699	Homeodomain protein of MTLalpha (Mating Type Like) locus; alpha2p, together with a1p, repress white-opaque switching and mating (an opaque-specific process); a/alpha mating type may increase virulence, provides competitive advantage
	orf19.5729	FGR17	14.0992	24.6299	1.74682	Putative DNA-binding transcription factor; has zinc cluster DNA-binding motif; lacks an ortholog in S. cerevisiae; transposon mutation affects filamentous growth; Hap43p-repressed gene
	orf19.255	ZCF1	10.8615	18.7812	1.74679	Zn(II)2Cys6 transcription factor; transcript regulated during hypha formation; 5'-UTR intron; mutants show decreased colonization of mouse kidneys; flow model biofilm induced; Spider biofilm induced
	orf19.684	NA	12.7774	22.2458	1.74521	Putative transcription factor with zinc finger DNA-binding motif; heterozygous null mutant exhibits hypersensitivity to parnafungin and cordycepin in the C. albicans fitness test
	orf19.2102	CKB1	10.6625	18.5842	1.74407	Regulatory subunit of protein kinase CK2 (casein kinase II), beta subunit; null mutants are hypersensitive to caspofungin and hydrogen peroxide medium
	orf19.4152	CEF3	8.93026	15.568	1.74343	Translation elongation factor 3; antigenic in humans; predicted C-term nucleotide-binding active site; protein on surface of yeast, not hyphae; polystyrene adherence induced; higher protein amount in stationary phase; possibly essential
	orf19.2528	NA	14.4573	24.9878	1.74247	Putative RNA polymerase III transcription factor (TFIIIB) subunit; flucytosine repressed
	orf19.5305	RHD3	11.5135	19.8913	1.74205	GPI-anchored yeast-associated cell wall protein; induced in high iron; clade-associated gene expression; not essential for cell wall integrity; fluconazole-repressed; flow model and Spider biofilm repressed
	orf19.5184	NA	14.3204	24.8113	1.74165	Putative Ran guanyl-nucleotide exchange factor; probable signal transducer; Spider biofilm repressed
	orf19.4035	PGA4	12.1443	20.9946	1.74127	GPI-anchored cell surface protein; beta-1,3-glucanosyltransferase with similarity to the A. fumigatus GEL family; transcript induced in RHE model of oral candidiasis; fluconazol-induced
	orf19.130	VPS15	10.2567	17.8524	1.74103	Protein involved in retrograde endosome-to-Golgi protein transport; required for normal virulence
	orf19.3149	LSP1	11.3801	19.8173	1.7408	Eisosome component with a predicted role in endocytosis; protein present in exponential and stationary growth phase yeast cultures; caspofungin repressed; biofilm induced; fungal-specific (no human/murine homolog); sumoylation target
	orf19.1542	HEX3	10.0217	17.443	1.73908	Protein similar to S. cerevisiae Hex3p, which is involved in DNA damage response; transposon mutation affects filamentous growth
	orf19.5698	NA	13.1466	22.8611	1.739	Putative mitochondrial ribosomal protein of the large subunit; transcript is upregulated in clinical isolates from HIV+ patients with oral candidiasis; Spider biofilm repressed
	orf19.1760	RAS1	11.5438	19.8367	1.73864	RAS signal transduction GTPase; regulates cAMP and MAP kinase pathways; role in hyphal induction, virulence, apoptosis, heat-shock sensitivity; nonessential; plasma membrane-localized; complements viability of S. cerevisiae ras1 ras2 mutant
	orf19.5917	STP1	14.2099	24.6645	1.73843	Transcription factor; regulates SAP2, OPT1 expression and thereby protein catabolism for nitrogen source; activated via amino-acid-induced proteolytic processing; macrophage/pseudohyphal-repressed; Spider biofilm repressed
	orf19.4568	ZCF25	10.3095	17.9083	1.73824	Putative Zn(II)2Cys6 transcription factor
	orf19.3233	HSE1	16.6662	28.9014	1.73813	ESCRT-0 complex subunit; SH3-domain-containing protein
	orf19.4432	KSP1	10.5401	18.2601	1.73758	Putative serine/threonine protein kinase; mRNA binds She3 and is localized to hyphal tips; mutation confers hypersensitivity to amphotericin B
	orf19.3201	MTLA1	10.8941	18.8794	1.73739	Homeodomain protein of the MTLa mating type locus; a1 and alpha2 together repress white-opaque switching and mating (an opaque-specific process); a/alpha mating type may increase virulence by competitive advantage; Spider biofilm induced
	orf19.2767	PGA59	14.0701	24.3833	1.7373	Adhesin-like cell wall protein; putative GPI-anchor; colony morphology-related gene regulation by Ssn6; Hap43-induced; Spider biofilm repressed
	orf19.6102	RCA1	13.1804	22.8268	1.73724	Protein involved in regulation of carbonic anhydrases; controls CO2 sensing; bZIP domain-containing transcription factor of the ATF/CREB family; null mutant displays slow growth, abnormal colony morphology and invasive growth
	orf19.6227	NA	11.4077	19.836	1.73707	Ortholog of C. dubliniensis CD36 : Cd36_06390, C. parapsilosis CDC317 : CPAR2_209040, Candida tenuis NRRL Y-1498 : CANTEDRAFT_114052 and Debaryomyces hansenii CBS767 : DEHA2D14300g
	orf19.5247	NA	15.0873	26.0688	1.73701	Ortholog(s) have cytoplasm localization
	orf19.703	NA	11.9573	20.7642	1.73643	Ortholog(s) have 2',3'-cyclic-nucleotide 3'-phosphodiesterase activity, role in cyclic nucleotide metabolic process and clathrin-coated vesicle localization
	orf19.2906	PGA41	12.4369	21.5804	1.73615	Putative GPI-anchored protein; adhesin-like protein
	orf19.5302	PGA31	11.5186	19.9966	1.73592	Cell wall protein; putative GPI anchor; expression regulated upon white-opaque switch; induced by Congo Red and cell wall regeneration; Bcr1-repressed in RPMI a/a biofilms
	orf19.1275	GAT1	21.1852	37.29	1.73422	GATA-type transcription factor; regulator of nitrogen utilization; required for nitrogen catabolite repression and utilization of isoleucine, tyrosine and tryptophan N sources; required for virulence in a mouse systemic infection model
	orf19.4252	NA	15.0878	26.119	1.73348	Ortholog(s) have protein serine/threonine kinase activity
	orf19.6901	NA	11.8039	20.5655	1.7329	Ortholog(s) have exoribonuclease activator activity, m7G(5')pppN diphosphatase activity
	orf19.6588	NBP2	11.4828	19.8724	1.73279	Protein containing an SH3 domain; involved in vacuolar fusion in hyphae; mutants form multiple germ tubes; Spider biofilm induced
	orf19.7374	CTA4	9.79537	16.7845	1.73273	Zn(II)2Cys6 transcription factor; induced by nitric oxide; induced by Mnl1 under weak acid stress; repressed upon adherence to polystyrene; Hap43-repressed; Spider biofilm induced
	orf19.4222	SST2	16.981	28.8365	1.73224	Predicted regulator of G-protein signaling in mating pathway; null mutation causes alpha-factor hypersensitivity and mating defect (in opaque MTLa/MTLa background); transcript induced by alpha factor
	orf19.2876	CBF1	10.6064	18.2179	1.73084	Transcription factor; binds ribosomal protein gene promoters and rDNA locus with Tbf1; regulates sulfur starvation-response, respiratory, glycolytic genes; does not bind to centromeres as does S. cerevisiae Cbf1; Spider biofilm repressed
	orf19.1002	NA	10.8482	18.6547	1.73043	Protein of unknown function; Hap43-repressed gene
	mtlalpha1	MTLALPHA1	11.0236	19.0204	1.72717	Master regulator (activator) of alpha mating type; gene of the MTLalpha (Mating Type Like) locus; ortholog of S. cerevisiae Alpha1p; a/alpha mating type may increase virulence, offers competitive advantage
	orf19.5004	RAD54	11.1876	19.1517	1.72615	Putative DNA-dependent ATPase involved in DNA repair; induced under hydroxyurea treatment; plays an essential role during mitotic growth; mutants display aberrant cell and nuclear morphology
	orf19.2878	PGA15	11.9369	20.1279	1.72606	Putative GPI-anchored protein
	orf19.795	VPS36	14.1583	24.4173	1.72411	ESCRT II protein sorting complex subunit; involved in Rim8 processing and proteolytic activation of Rim101, which regulates pH response; role in uptake of Histatin-5 into vacuole
	orf19.3308	STB5	15.5939	26.8114	1.72379	Putative transcription factor with zinc cluster DNA-binding motif; has similarity to S. cerevisiae Stb5p; Hap43p-repressed gene
	orf19.5849	CWT1	15.0935	26.1207	1.72277	Zn2Cys6 transcription factor involved in negative regulation of nitrosative stress response; mutant has cell wall defects; transcription increased at stationary phase; has predicted PAS domain; similar to S. cerevisiae Rds2p
	orf19.3760	DLH1	12.0222	20.2934	1.72171	Functional homolog of S. cerevisiae Dmc1; a meiosis-specific protein required for repair of double-strand breaks and pairing between homologous chromosomes
	orf19.2983	CDC73	9.8078	16.8416	1.72165	Putative transcription elongation factor; cdc73 kap114 double transposon mutation affects filamentous growth; Spider biofilm repressed
	orf19.861	CAP4	11.5281	19.7271	1.72035	Predicted bZip transcription factor; possibly an essential gene, disruptants not obtained by UAU1 method
	orf19.3077	VID21	13.618	23.4264	1.7203	Subunit of the NuA4 histone acetyltransferase complex; soluble protein in hyphae; Spider biofilm repressed
	orf19.5045	PTP2	10.266	17.6684	1.71977	Predicted protein tyrosine phosphatase; involved in regulation of MAP kinase Hog1 activity; induced by Mnl1 under weak acid stress; rat catheter and Spider biofilm induced
	orf19.5335	SGS1	10.4513	17.8293	1.71928	RecQ-related DNA helicase; Bloom's syndrome-related gene; haploinsufficient for wild-type lifespan; upregulated in farnesol treated biofilm
	orf19.843	NA	14.6414	25.1411	1.71886	Putative DNA repair exonuclease; fungal-specific (no human or murine homolog)
	orf19.3281	NA	15.5485	26.0081	1.71883	Ortholog(s) have histone demethylase activity (H3-K36 specific), methylated histone residue binding activity and role in histone demethylation
	orf19.4725	SWI6	13.8162	23.6737	1.71726	Putative component of the MBF and SBF transcription complexes involved in G1/S cell-cycle progression; periodic mRNA expression, peak at cell-cycle G1/S phase
	orf19.6850	NA	15.2763	26.3062	1.71643	Putative transcription factor with C3HC4 zinc finger DNA-binding motif; mutants are viable
	orf19.4662	RLM1	15.7752	27.0862	1.71502	Putative transcription factor; required for wild-type resistance to cell wall perturbation, caspofungin treatment; regulates caspofungin induction of PGA13
	orf19.5031	SSK1	18.2598	30.8335	1.71462	Response regulator of two-component system; role in oxidative stress response, cell wall biosynthesis, virulence, hyphal growth on solid media; expressed in hyphae and yeast; peroxisomal targeting sequence (PTS1); Spider biofilm induced
	orf19.791	RIM11	15.6247	26.6225	1.71423	Ortholog of S. cerevisiae Rim11; a protein kinase involved in meiosis and sporulation in S. cerevisiae; mutant is viable
	orf19.1468	CDC55	15.0067	25.4376	1.71382	Ortholog(s) have protein phosphatase type 2A regulator activity, protein serine/threonine phosphatase activity
	orf19.5343	ASH1	13.9176	23.563	1.71366	GATA-like transcription factor; localizes to daughter cell, hyphal tip cell nuclei; mRNA localization mediated by She3; required for WT virulence and filamentous growth on solid media; Ras1 repressed in yeast, Cyr1 repressed yeast, hyphae
	orf19.2320	NA	17.794	30.4517	1.71359	Putative serine/threonine-protein kinase; possibly an essential gene, disruptants not obtained by UAU1 method
	orf19.3449	NA	15.7825	26.9957	1.71196	Ortholog(s) have ubiquitin-protein ligase activity, role in histone catabolic process, histone ubiquitination and cytoplasm, ribosome localization
	orf19.7281	PDK2	14.7405	25.0326	1.7118	Putative pyruvate dehydrogenase kinase; mutation confers hypersensitivity to amphotericin B
	orf19.4438	RME1	11.5049	19.3823	1.71157	Zinc finger protein; controls meiosis in S. cerevisae; white-specific transcript; upregulation correlates with clinical development of fluconazole resistance; Upc2-regulated in hypoxia; flow model biofilm induced; Spider biofilm repressed
	orf19.6376	PTC5	16.059	27.4741	1.71033	Mitochondrial protein phosphatase of the Type 2C-related family (serine/threonine-specific), involved in drug response and cadmium tolerance
	orf19.4125	PZF1	15.7983	26.9989	1.71005	C2H2 transcription factor; Hap43-induced; rat catheter and Spider biofilm induced
	orf19.1622	YCG1	11.5554	19.7274	1.71005	Putative condensin G
	orf19.1769	NA	11.9826	20.3066	1.70984	Ortholog(s) have G-protein beta/gamma-subunit complex binding, actin binding activity, role in positive regulation of transcription from RNA polymerase II promoter by pheromones, protein folding and cytoplasm localization
	orf19.971	SKN7	14.8099	25.2718	1.70894	Putative homolog of S. cerevisiae Skn7p, which is predicted to be a response regulator protein in a phosphorelay signal transduction pathway; required for normal hydrogen peroxide resistance
	orf19.1189	NA	10.1627	17.3117	1.7089	Protein of unknown function; regulated by yeast-hypha switch; induced by Mnl1 in weak acid stress; 5' UTR intron; repressed by chlamydospore formation in C. albicans and C. dubliniensis; rat catheter, Spider and flow model biofilm induced
	orf19.2695	UBR1	11.3098	19.3072	1.70874	Protein similar to S. cerevisiae Ubr1p ubiquitin-protein ligase; transposon mutation affects filamentous growth; Spider biofilm induced
	orf19.399	NA	13.5875	23.2073	1.70789	Putative serine/threonine protein kinase; possibly an essential gene, disruptants not obtained by UAU1 method
	orf19.4799	CEF1	12.5192	21.2653	1.70627	Putative mRNA splicing factor; ortholog is essential in S. cerevisiae; Spider biofilm induced
	orf19.1985	NA	17.2583	29.0319	1.70616	Has aminoglycoside phosphotransferase and protein kinase domains; rat catheter and flow model biofilm induced
	orf19.3330	CRL1	10.9262	18.6356	1.70616	Predicted GTPase of RHO family; CAAX motif geranylgeranylated; expression in S. cerevisiae causes dominant-negative inhibition of pheromone response
	orf19.2087	SAS2	11.0142	18.7765	1.70486	Predicted histone acetyltransferase involved in histone H4 acetylation; member of MYST family
	orf19.2429	NA	10.4382	17.8011	1.70462	Protein of unknown function; induced by alpha pheromone in SpiderM medium
	orf19.3841	NA	10.4207	17.6795	1.70461	Putative protein serine/threonine kinase; predicted role in vesicle formation in autophagy and the cytoplasm-to-vacuole targeting (Cvt) pathway; Spider biofilm induced
	orf19.3669	SHA3	17.0416	29.0323	1.70315	Putative ser/thr kinase involved in glucose transport; Tn mutation affects filamentous growth; fluconazole-induced; ketoconazole-repressed; induced in by alpha pheromone in SpiderM; possibly essential; flow model biofilm induced
	orf19.3459	NA	9.67036	16.4661	1.70267	Putative serine/threonine/tyrosine (dual-specificity) kinase; disruptants not obtained by UAU1 method
	orf19.259	NA	11.3989	19.3684	1.70192	Protein with a predicted role in 60S ribosomal subunit assembly; flow model biofilm induced
	orf19.3753	SEF1	10.2962	17.4593	1.70109	Zn2-Cys6 transcription factor; regulates iron uptake; negatively regulated by Sfu1p, positively regulated by Tbf1; promotes virulence in mice; mutants display decreased colonization of mouse kidneys; Spider biofilm induced
	orf19.3263	ATO10	11.2692	19.0824	1.69948	Putative fungal-specific transmembrane protein; rat catheter and Spider biofilm induced
	orf19.4208	RAD52	10.5541	17.8913	1.69925	Required for homologous DNA recombination, repair of UV- or MMS-damaged DNA, telomere length, UV-induced LOH; constitutive expression, MMS-induced; weakly complements S. cerevisiae rad52 mutant; slow growth, increased white-to-opaque switch
	orf19.3829	PHR1	13.3112	22.6068	1.69924	Cell surface glycosidase; may act on cell-wall beta-1,3-glucan prior to beta-1,6-glucan linkage; role in systemic, not vaginal virulence (neutral, not low pH); high pH or filamentation induced; Bcr1-repressed in RPMI a/a biofilm
	orf19.6182	MRR2	15.0929	25.5951	1.69877	Zn(II)2Cys6 transcription factor involved in regulation of multidrug resistance via control of CDR1 expression; mutants display decreased colonization of mouse kidneys; required for yeast cell adherence to silicone substrate
	orf19.5156	NA	12.7854	21.7191	1.69866	Protein similar to S. cerevisiae Phs1p, which is required for growth; has six putative membrane-spanning regions
	orf19.2075	DFG5	12.278	20.4392	1.69862	N-linked mannoprotein of cell wall and membrane; possible signal transducer; role in hyphal growth and HWP1 induction in alkaline pH; GPI modification predicted; dfg5 dcw1 double mutant is inviable; caspofungin-induced, fungal-specific
	orf19.681	HAP43	15.2277	25.8919	1.69855	CCAAT-binding factor-dependent transcription factor; repressor; also called CAP2; required for low iron response; similar to bZIP transcription factor AP-1; repressed by Sfu1; ciclopirox olamine induced; rat catheter, Spider biofilm induced
	orf19.5551	MIF2	13.1761	22.2585	1.69843	Centromere-associated protein; similar to CENP-C proteins; Cse4p and Mif2p colocalize at C. albicans centromeres
	orf19.5848	NA	13.9199	23.4654	1.69832	RING-type zinc finger protein; upregulated during oral infection; mutants have reduced ability to damage oral epithelial cells; Spider and flow model biofilm induced
	orf19.4837	DAM1	12.9427	21.9687	1.69821	Essential subunit of the Dam1 (DASH) complex, which acts in chromosome segregation by coupling kinetochores to spindle microtubules
	orf19.7115	SAC7	16.8295	27.7909	1.69736	Putative GTPase activating protein (GAP) for Rho1; repressed upon adherence to polystyrene; macrophage/pseudohyphal-repressed; transcript is upregulated in RHE model of oral candidiasis and in clinical oral candidiasis
	orf19.7033	NA	10.2191	17.2786	1.69712	Putative dual specificity protein phosphatase, similar to S. cerevisiae Pps1p
	orf19.1224	FRP3	10.2959	17.4622	1.69601	Putative ammonium transporter; upregulated in the presence of human neutrophils; fluconazole-downregulated; repressed by nitric oxide; Spider biofilm induced; rat catheter biofilm repressed
	orf19.6365	PTP1	11.5545	19.6201	1.69561	Phosphotyrosine-specific protein phosphatase; rat catheter biofilm induced
	orf19.532	RBR2	13.2092	21.4303	1.6955	Cell wall protein; expression repressed by Rim101; transcript regulated upon white-opaque switching; repressed by alpha pheromone in SpiderM medium; macrophage-induced gene
	orf19.4084	KIS1	13.9149	23.5888	1.69537	Snf1p complex scaffold protein; similar to S. cerevisiae Gal83p and Sip2p with regions of similarity to Sip1p (ASC and KIS domain); interacts with Snf4p; mutants are hypersensitive to caspofungin and hydrogen peroxide; Hap43p-repressed gene
	orf19.7310	NA	10.8838	18.2703	1.69487	Protein with a role in directing meiotic recombination events to homologous chromatids; induced by ciclopirox olamine; positively regulated by Sfu1; Hog1, fluconazole-repressed; Hap43-induced; Spider biofilm induced
	orf19.1874	NA	16.3367	27.008	1.69463	Ortholog(s) have protein serine/threonine kinase activity, role in meiosis, meiotic recombination checkpoint, protein phosphorylation, regulation of linear element assembly and cytosol, linear element localization
	orf19.2699	ABP1	14.3768	24.4789	1.69374	Ortholog of S. cerevisiae Abp1; actin-binding protein of the cortical actin cytoskeleton; caspofungin induced; protein only detected in stationary phase yeast-form cultures; Spider biofilm repressed
	orf19.2393	NA	11.4769	19.3887	1.69349	Putative transcription factor with zinc finger DNA-binding motif
	orf19.3300	ZPR1	23.548	36.8326	1.69315	Protein with putative zinc finger; regulated by Gcn4p; repressed in response to amino acid starvation (3-aminotriazole treatment); upregulation correlates with clinical development of fluconazole resistance
	orf19.4334	PGA58	12.2982	20.6452	1.69285	Putative GPI-anchored protein; transcription is positively regulated by Tbf1p
	orf19.5975	TRY4	11.592	19.6241	1.69268	C2H2 transcription factor; fluconazole-repressed; induced in ssr1 mutant; required for yeast cell adherence to silicone substrate; Spider biofilm induced
	orf19.1960	CLN3	13.3584	22.6319	1.69144	G1 cyclin; depletion abolishes budding and causes hyphal growth defects; farnesol regulated, functional in S. cerevisiae; possibly essential (UAU1 method); other biofilm induced; Spider biofilm induced
	orf19.4645	BEM1	12.9524	21.9131	1.69144	Protein required for wild-type budding, hyphal growth, and virulence in a mouse systemic infection; suppresses pseudohyphal and filamentous growth defects of various S. cerevisiae mutants and heat sensitivity of S. cerevisiae cdc24-4 mutant
	orf19.513	NA	11.2414	19.017	1.69125	Protein with a DNA-binding domain, similar to S. cerevisiae meiosis-specific transcription factor Ndt80p
	orf19.1178	NA	12.0357	20.1601	1.69113	Putative transcription factor with bZIP DNA-binding motif; Hap43p-repressed gene
	orf19.7504	NA	11.4157	19.2648	1.68939	Ortholog of S. cerevisiae Rts3; a component of the protein phosphatase type 2A complex; Plc1-regulated; induced in core caspofungin response; Spider biofilm induced
	orf19.6915	MRE11	15.1338	25.4965	1.68934	Putative DNA double-strand break repair factor; involved in response to oxidative stress and drug resistance
	orf19.1223	DBF2	12.8148	21.6697	1.68922	Essential serine/threonine protein kinase involved in mitotic spindle formation and cytokinesis; required for septum formation, exit from mitosis, and normal hyphal morphogenesis; virulence-group-correlated expression
	orf19.719	NA	14.3415	24.1321	1.68908	Ortholog(s) have ubiquitin-protein ligase activity
	orf19.2054	FGR15	15.598	26.2369	1.68772	Putative transcription factor with zinc finger DNA-binding motif; lacks an ortholog in S. cerevisiae; transposon mutation affects filamentous growth; caspofungin induced; mutation causes marginal increase in caspofungin sensitivity
	orf19.4105	NA	11.0208	18.5828	1.68703	Ortholog(s) have role in DNA repair, DNA replication checkpoint, establishment of mitotic sister chromatid cohesion, maintenance of DNA repeat elements, meiotic chromosome segregation, replication fork arrest, replication fork protection
	orf19.3856	CDC28	11.4989	19.3295	1.68688	Cyclin-dependent protein kinase; interacts with regulatory subunit Cyb1; determination of cell morphology during the cell cycle; phosphorylated mostly by Swe1 and phosphorylation is regulated by Hsl1; 5'-UTR intron; Spider biofilm repressed
	orf19.5956	PIN3	10.926	18.4256	1.6865	Putative SH3-domain-containing protein; predicted role in actin cytoskeleton organization; Spider biofilm repressed
	orf19.1596	FGR28	11.4036	19.2115	1.68618	Protein lacking an ortholog in S. cerevisiae; transposon mutation affects filamentous growth; possibly an essential gene, disruptants not obtained by UAU1 method
	orf19.6589	SSF1	14.5979	24.2995	1.68569	Protein involved in ribosome biogenesis; ortholog of S. cerevisiae Ssf1; Hap43-induced; rat catheter and Spider biofilm induced
	orf19.4651	PGA53	12.107	20.3776	1.68465	GPI-anchored cell surface protein of unknown function; greater mRNA abundance observed in a cyr1 homozygous null mutant than in wild type
	orf19.5736	ALS5	12.5741	20.9544	1.68442	ALS family adhesin; highly variable; expression in S. cerevisiae causes adhesion to human epithelium, endothelium or ECM, endothelial invasiveness by endocytosis and, at high abundance, ECM-induced aggregation; can form amyloid fibrils
	orf19.6028	HGC1	12.2008	20.4697	1.68105	Hypha-specific G1 cyclin-related protein involved in regulation of morphogenesis, biofilm formation; Cdc28-Hgc1 maintains Cdc11 S394 phosphorylation during hyphal growth; required for virulence in mice; regulated by Nrg1, Tup1, farnesol
	orf19.1576	NA	13.5262	22.7319	1.68089	Ortholog(s) have nuclear localization sequence binding, ubiquitin binding activity, role in response to ethanol and cytosol localization
	orf19.5219	IRA2	10.6786	17.9436	1.68067	GTPase-activating protein; negatively regulates RAS by converting it from the GTP- to the GDP-bound inactive form; Spider biofilm induced; flow model biofilm repressed
	orf19.3854	NA	14.0033	23.4624	1.68009	Ortholog of S. cerevisiae Sat4; amphotericin B induced; clade-associated gene expression; Spider biofilm induced
	orf19.6239	NA	11.4244	19.1699	1.6791	Putative serine/threonine protein kinase; possibly an essential gene, disruptants not obtained by UAU1 method
	orf19.7227	NA	12.2684	20.4333	1.67815	Protein phosphatase inhibitor; Hap43-repressed; homozygous Tn insertion decreases colony wrinkling but does not block hyphal growth in liquid media; mutation confers hypersensitivity to toxic ergosterol analog; Spider biofilm induced
	orf19.829	SCH9	10.2877	17.2028	1.67649	Protein kinase; involved in growth control, cell size, resistance to rapamycin, cations, chlamydospore formation, filamentous growth under some conditions, and virulence; prevents hyphal growth in hypoxia at high CO2; Spider biofilm induced
	orf19.3187	ZNC1	11.3996	19.0082	1.67578	Zn(2)-Cys(6) transcription factor; regulated by Gcn2 and Gcn4; gene located in zinc cluster region of Chromosome 5, near the MTL locus; required for yeast cell adherence to silicone substrate; Spider biofilm induced
	orf19.4086	NA	11.6546	19.4397	1.67529	Ortholog(s) have cytoplasm localization
	orf19.6987	DNM1	10.2455	17.2031	1.67452	Putative dynamin-related GTPase; transcript upregulated inbRHE model of oral candidiasis; transcript regulated by Nrg1, Mig1, and Tup1
	orf19.6638	PTC4	10.7082	17.9497	1.67365	Type PP2C serine/threonine phosphatase; localized to mitochondria; mutation causes sensitivity to sodium, potassium and azole drugs; decreased expression in hyphae compared to yeast-form cells
	orf19.4002	DUN1	11.3085	18.9167	1.67357	Protein similar to S. cerevisiae Dun1p, which is a serine-threonine protein kinase involved in DNA damage cell-cycle checkpoint; induced under Cdc5p depletion
	orf19.4537	NA	10.4815	17.479	1.67349	Ortholog(s) have RNA polymerase II core binding, RNA polymerase II regulatory region DNA binding, core RNA polymerase II recruiting transcription factor activity
	orf19.1944	GPR1	10.6732	17.8136	1.67321	Plasma membrane G-protein-coupled receptor of the cAMP-PKA pathway; required for WT hyphal growth; reports differ on role in cAMP-mediated glucose signaling; Gpr1 C terminus binds Gpa2; regulates HWP1 and ECE1; flow model biofilm induced
	orf19.1105.2	PGA56	12.3792	20.6606	1.67306	Regulator of sorbose utilization; putative GPI-anchor; hypha and cell wall regeneration induced; colony morphology-related gene regulation by Ssn6; induced by Tbf1, Hap43; Spider biofilm induced
	orf19.6038	UGA32	20.0142	33.754	1.67278	Predicted Zn(II)2Cys6 transcription factor; has similarity to S. cerevisiae Uga3, a transcription factor involved in the regulation of gamma-aminobutyrate metabolism genes; rat catheter biofilm induced
	orf19.410.3	RIB4	12.2436	20.2734	1.67225	Lumazine synthase (6,7-dimethyl-8-ribityllumazine synthase, DMRL synthase); catalyzes the penultimate step in the synthesis of riboflavin; Hap43-induced; rat catheter and Spider biofilm repressed
	orf19.1674	CDC53	9.98541	16.6085	1.67156	Cullin, a scaffold subunit of the SCF ubiquitin-ligase complexes; depletion leads to increased filamentous growth and premature cell death
	orf19.4689	PGA57	11.2038	18.4881	1.67133	Putative GPI-anchored protein; Hap43p-induced gene
	orf19.6874	NA	15.6513	25.9571	1.67112	Putative helix-loop-helix (HLH) transcription factor with a role in filamentous growth
	orf19.3923_2	PGA37	12.5288	20.9034	1.67098	Putative GPI-anchored protein; Hap43-repressed; Spider biofilm induced
	orf19.7583	ZCF39	17.7409	29.026	1.6695	Zn(II)2Cys6 transcription factor; mutants are viable; filament induced; required for yeast cell adherence to silicone substrate; Spider biofilm induced
	orf19.6885	SPO7	11.132	18.4847	1.6688	Putative regulatory subunit of Nem1-Spo7 phosphatase holoenzyme that regulates nuclear growth by controling phospholipid biosynthesis; induced by alpha pheromone in SpiderM medium
	orf19.7518	ZCF38	13.8609	23.0771	1.66851	Putative Zn(II)2Cys6 transcription factor
	orf19.3174	CDC24	8.8293	14.6208	1.66804	GDP-GTP exchange factor for Cdc42p; phosphorylated; required for maintenance of hyphal growth; misexpression blocks hyphal growth and causes avirulence in a mouse model of systemic infection; antigenic during human oral infection
	orf19.1956	NA	10.8179	17.9055	1.66786	Ortholog(s) have role in reciprocal meiotic recombination and mitochondrion localization
	orf19.2379	NOT4	15.5772	25.944	1.66728	Putative E3 ubiquitin-protein ligase; required for maintenance, but not induction, of hyphal development; homozygous null mutant is avirulent in mouse systemic infection despite persistence in host; repressed in rat oral candidiasis
	orf19.3188	TAC1	11.2913	18.641	1.6642	Zn(2)-Cys(6) transcriptional activator of drug-responsive genes (CDR1 and CDR2); binds DRE element; gene in zinc cluster region near MTL locus; resequencing indicates that TAC1 spans orf19.3188 and orf19.3189; Spider biofilm induced
	orf19.996	NA	10.4922	17.3639	1.6637	Protein with a predicted leucine-rich repeat domain; possibly an essential gene, disruptants not obtained by UAU1 method
	orf19.2475	PGA26	11.7963	19.6165	1.66339	GPI-anchored adhesin-like protein of the cell wall; role in cell wall integrity; required for normal virulence; induced in high iron and during cell wall regeneration; Hap43-repressed
	orf19.6243	VPS34	9.88654	16.439	1.66275	Autophosphorylated class III phosphatidylinositol 3-kinase; required for normal vesicle transport, hyphal growth, fibroblast adherence, virulence in mouse systemic infection; growth-regulated; caspofungin and hydrogen peroxide sensitivity
	orf19.7282	PEX13	11.1699	18.6001	1.66273	Protein required for peroxisomal protein import mediated by PTS1 and PTS2 targeting sequences; transcript induced in an RHE model of oral candidiasis; Hap43-repressed gene
	orf19.5104	LTP1	16.5356	27.5061	1.66211	Putative protein phosphatase of the PTP family (tyrosine-specific), similar to S. cerevisiae Ltp1p
	orf19.2105	NA	12.2826	20.4108	1.66124	Putative pre-mRNA-splicing factor; possibly an essential gene, disruptants not obtained by UAU1 method
	orf19.6407	NA	16.0473	26.5912	1.66071	Ortholog(s) have role in ribosomal large subunit biogenesis and cytoplasm, cytosolic large ribosomal subunit, preribosome, large subunit precursor localization
	orf19.3608	MSH3	12.5314	20.8693	1.65949	Mismatch repair protein; predicted role in repair of insertion or deletion mutations and removal of nonhomologous DNA ends; rat catheter biofilm repressed
	orf19.2084	CDH1	11.2587	18.7132	1.65923	Protein involved in regulation of mitosis; similar to S. cerevisiae Cdh1, which is an APC/C component; transcriptionally induced by Mnl1 under weak acid stress
	orf19.2237	SPR1	12.2671	20.3499	1.65912	Putative GPI-anchored protein; similar but not orthologous to S. cerevisiae Spr1, a sporulation-specific exo-1,3-beta-glucanase; mutant is viable
	orf19.2277	TPK2	14.3407	23.5171	1.65882	cAMP-dependent protein kinase catalytic subunit; isoform of Tpk1; needed for epithelial cell damage, engulfment and oral (not systemic) virulence in mice; control of morphogenesis and stress response; rat catheter, Spider biofilm repressed
	orf19.5910	NA	11.3777	18.8004	1.65863	Putative histone acetyltransferase complex subunit; induced upon low-level peroxide stress; Spider biofilm induced
	orf19.1571	ATO7	14.706	23.3856	1.65812	Putative fungal-specific transmembrane protein
	orf19.2706	CRH11	11.4733	19.1406	1.65795	GPI-anchored cell wall transglycosylase, putative ortholog of S. cerevisiae Crh1p; predicted glycosyl hydrolase domain; similar to Csf4p and to antigenic A. fumigatus Aspf9; predicted Kex2p substrate; caspofungin-induced
	orf19.2879	IFF5	11.8473	19.6594	1.65795	Putative GPI-anchored protein; adhesin-like protein; possibly an essential gene, disruptants not obtained by UAU1 method
	orf19.487	SPT14	14.8229	24.2158	1.65685	Putative DNA-binding transcription factor; predicted role in regulation of biogenesis of the cell wall; upregulated in biofilm; protein newly produced during adaptation to the serum
	orf19.2907	PGA42	14.1133	22.5659	1.65626	Putative GPI-anchored adhesin-like protein; decreased transcription is observed in azole-resistant strains that overexpress CDR1 and CDR2 or MDR1
	orf19.4853	HCM1	14.2451	23.5489	1.65581	Protein with forkhead domain; similar to S. cerevisiae Hcm1p; Hap43p-induced gene
	orf19.643	NA	13.2923	21.2054	1.65568	Ortholog(s) have role in apoptotic process, mitotic spindle elongation, sister chromatid biorientation, spindle assembly checkpoint
	orf19.4433	CPH1	14.889	24.473	1.65562	Transcription factor; for mating, filamentation on solid media, pheromone-stimulated biofilms; in pathway with Ess1, Czf1; required with Efg1 for host cytokine response; regulates galactose metabolism genes; rat cathether biofilm repressed
	orf19.2093	RFA1	11.2933	18.4928	1.65482	Putative DNA replication factor A; RNA abundance regulated by cell cycle, tyrosol and cell density
	orf19.876	PGA33	14.1094	22.0386	1.65469	Putative GPI-anchored protein of unknown function; Spider biofilm repressed
	orf19.454	SFL1	11.0794	18.156	1.65381	Transcription factor involved in negative regulation of morphogenesis, flocculation and virulence; induced in core caspofungin response; Spider biofilm induced
	orf19.801	TBF1	10.2551	16.9292	1.65366	Essential transcription factor; induces ribosomal protein genes and the rDNA locus; acts with Cbf1 at subset of promoters; recruits Fhl1 and Ifh1 to promoters; role is analogous to that of S. cerevisiae Rap1; Spider biofilm induced
	orf19.5376	NA	10.3788	17.1537	1.65347	Ortholog of S. cerevisiae Elm1; a serine/threonine protein kinase that regulates cellular morphogenesis, septin behavior, and cytokinesis in S. cerevisiae; possibly an essential gene, disruptants not obtained by UAU1 method
	orf19.6472	CYP1	11.4282	18.7771	1.65319	Peptidyl-prolyl cis-trans isomerase; cyclosporin A sensitive activity; soluble in hyphae; biofilm induced, macrophage-induced protein; downregulated upon treatment of biofilm with farnesol; present in exponential and stationary phase cells
	orf19.6781	ZFU2	14.6369	24.1888	1.65292	Zn(II)2Cys6 transcription factor; regulator of yeast form adherence; mutants display increased colonization of mouse kidneys; required for yeast cell adherence to silicone substrate; Spider biofilm induced
	orf19.4295	NA	10.1468	16.7858	1.65283	Ortholog(s) have DNA binding, nucleosome binding, transcription corepressor activity
	orf19.2204.2	RHO2	13.0676	21.6692	1.65273	Ortholog(s) have GTPase activity
	orf19.7105	FAR1	10.5883	17.494	1.6511	Protein involved in regulation of pheromone-mediated mating; repressed by A1p and Alpha2p in white-phase cells; null mutant shows no pheromone response in opaque cells; overexpression causes enhanced pheromone response and cell cycle arrest
	orf19.4910	FGR41	12.83	20.652	1.65106	Putative GPI-anchored adhesin-like protein; transposon mutation affects filamentous growth; Spider biofilm repressed
	orf19.4127	NA	16.2642	26.4375	1.65048	Ortholog(s) have actin filament binding activity, role in actin cortical patch localization, actin filament bundle assembly, endocytosis and actin cortical patch localization
	orf19.5008	DAD1	11.3774	18.7758	1.65021	Subunit of the Dam1 (DASH) complex, which acts in chromosome segregation by coupling kinetochores to spindle microtubules
	orf19.3865	RFX1	12.1075	20.0068	1.6495	Transcription factor; involved in DNA damage responses, morphogenesis, and virulence; Spider biofilm induced
	orf19.2236	FHL1	9.62929	15.8951	1.64855	Fork-head transcription factor; forms a heterodimer with Ifh1 that is tethered to promoters by Tbf1; positively regulates rRNA and ribosomal protein gene transcription
	orf19.220	PIR1	12.0329	19.8825	1.64837	1,3-beta-glucan-linked cell wall protein; N-mannosylated, O-glycosylated by Pmt1; cell wall defect in het mutant; Hog1/fluconazole/hypoxia induced; iron/Efg1/Plc1/temp regulated; flow model biofilm induced; hyphal, Spider biofilm repressed
	orf19.53	NA	15.988	26.4261	1.6483	Ortholog(s) have role in generation of catalytic spliceosome for first transesterification step, mRNA cis splicing, via spliceosome and commitment complex, cytosol localization
	orf19.4518	NA	10.0827	16.6224	1.64807	Protein kinase of unknown function; mutants are viable
	orf19.976	BRE1	18.2343	29.9761	1.64781	Putative transcription factor with C3HC4 zinc finger DNA-binding motif; similar to S. cerevisiae Bre1p; transposon mutation affects filamentous growth
	orf19.6305	NA	10.6231	17.4933	1.64749	Hydroxytrimethyllysine aldolase, the second enzyme in the carnitine biosynthesis pathway; rat catheter biofilm repressed
	orf19.676	NA	11.0159	18.1187	1.64548	Microtubule-binding protein of the cortical microtubule; delays exit from mitosis when the spindle is abnormally oriented; Spider biofilm repressed
	orf19.1187	CPH2	10.2502	16.8671	1.64468	Myc-bHLH transcription factor; promotes hyphal growth; directly regulates Tec1 to induce hypha-specific genes; probably homodimeric, phosphorylated; required for colonization of the mouse GI tract; rat catheter and Spider biofilm induced
	orf19.2753	ZCF15	10.0426	16.4598	1.64186	Predicted Zn(II)2Cys6 transcription factor of unknown function; rat catheter biofilm induced
	orf19.4251	ZCF22	10.8805	17.7737	1.64165	Predicted Zn(II)2Cys6 transcription factor
	orf19.6824	TRY6	15.6816	25.5821	1.64161	Helix-loop-helix transcription factor; regulator of yeast form adherence; required for yeast cell adherence to silicone substrate; Spider and F-12/CO2 biofilm induced; repressed by alpha pheromone in SpiderM medium
	orf19.7385	NA	17.991	27.582	1.64158	CCCH zinc finger protein; Spider biofilm induced
	orf19.6163	CSE4	10.753	17.4186	1.6415	Centromeric histone H3 variant; role in structural changes of centromeric nucleosomes during cell cycle; 4 nucleosomes bind 1 centromere, each has 1 Cse4 molecule during most of cell cycle, 2 molecules in anaphase; Spider biofilm repressed
	orf19.5760	IHD1	12.2734	19.681	1.64118	GPI-anchored protein; alkaline, hypha-induced; regulated by Nrg1, Rfg1, Tup1 and Tsa1, Tsa1B in minimal media at 37; oralpharyngeal candidasis induced ; Spider biofilm induced; regulated in Spider biofilms by Tec1, Efg1, Ndt80, Rob1, Brg1
	orf19.3738	PGA22	12.2868	20.2949	1.64108	Putative GPI-anchored protein; adhesin-like protein
	orf19.1850	SIW14	12.236	20.0232	1.64054	Putative protein phosphatase of the PTP family (tyrosine-specific), similar to S. cerevisiae Siw14p; mutant shows virulence defect; Hap43p-repressed gene
	orf19.810	NA	11.9145	19.4029	1.63968	Ortholog(s) have DNA helicase activity, role in DNA unwinding involved in DNA replication, reciprocal meiotic recombination, synapsis and nucleus localization
	orf19.2808	ZCF16	10.8886	17.7344	1.63904	Predicted Zn(II)2Cys6 transcription factor; mutants are viable; rat catheter biofilm induced
	orf19.4009	CNB1	14.6642	24.3836	1.63897	Regulatory subunit of calcineurin B (Ca[2+]-calmodulin-regulated S/T protein phosphatase); required for wild-type resistance to fluconazole or to SDS; micafungin is fungicidal to null mutant
	orf19.4869	SFU1	13.3892	21.569	1.63886	GATA-type transcription factor; regulator of iron-responsive genes; represses iron utilization genes if iron is present; Hap43-repressed; promotes gastrointestinal commensalism in mice; Spider biofilm induced
	orf19.2540	SAS3	10.0703	16.6182	1.63877	Similar to silencing proteins; increased transcription is observed upon fluphenazine treatment; rat catheter biofilm repressed
	orf19.4318	MIG1	17.3361	28.0098	1.63811	C2H2 transcription factor; repressor; regulates genes for carbon source utilization; Tup1-dependent and independent functions; hyphal, Hap43 and caspofungin repressed; Spider and flow model biofilm induced
	orf19.4056	BRG1	14.9687	24.4323	1.63802	Transcription factor; recruits Hda1 to hypha-specific promoters; Tn mutation affects filamentation; Hap43-repressed; Spider and flow model biofilm induced; required for Spider biofilm formation; Bcr1-repressed in RPMI a/a biofilms
	orf19.4867	SWE1	12.0188	19.429	1.63788	Putative protein kinase with a role in control of growth and morphogenesis, required for full virulence; mutant cells are small, rounded, and sometimes binucleate; not required for filamentous growth; mutant is hypersensitive to caspofungin
	orf19.6760	MDS3	12.2385	19.8683	1.63685	TOR signaling pathway component; required for growth and hyphal formation at alkaline pH, for full virulence in a mouse model of systemic infection and for SD and Spider medium biofilm formation; role in chlamydospore formation
	orf19.4972	NA	16.8357	27.6856	1.63663	Putative transcription factor with zinc finger DNA-binding motif
	orf19.2062	SOD4	12.559	20.5943	1.63595	Cu and Zn-containing superoxide dismutase; role in response to host innate immune ROS; regulated on white-opaque switch; ciclopirox olamine induced; caspofungin repressed; SOD1,4,5,6 gene family; yeast-associated; Spider biofilm induced
	orf19.6810	NA	18.8927	30.6326	1.63573	Ortholog(s) have protein serine/threonine phosphatase activity
	orf19.6763	SLK19	11.4739	18.5841	1.63562	Alkaline-induced protein of plasma membrane; affects cell aggregation, cell wall; similar to S. cerevisiae Slk19p (a kinetochore protein with roles in mitosis, meiosis); required for wild-type virulence in mouse; macrophage-downregulated
	orf19.6936	RAD53	14.8788	24.3342	1.63545	Protein involved in regulation of DNA-damage-induced filamentous growth; putative component of cell cycle checkpoint; ortholog of S. cerevisiae Rad53p, protein kinase required for cell-cycle arrest in response to DNA damage
	orf19.1822	UME6	12.5601	20.39	1.63505	Zn(II)2Cys6 transcription factor; role in hyphal extension, virulence, adherence to plastic; rat catheter biofilm induced; has a long 5'-UTR that regulates translational efficiency and controls transition to filamentous growth
	orf19.1028	ELA1	16.7656	26.4836	1.63502	Elongin A; F-box protein; ubiquitin-protein ligase; role in protein ubiquitination and ubiquitin-dependent protein catabolism; rat catheter biofilm induced
	orf19.5377	HOS2	11.473	18.3911	1.63496	Putative histone deacetylase; mutations affect filamentous growth; genetic evidence suggests that Set3p and Hos2p function together as a complex involved in regulation of white-opaque switching, morphogenesis, and virulence
	orf19.1434	NA	11.3644	18.5429	1.63462	Ortholog(s) have protein kinase activator activity
	orf19.5908	TEC1	11.5548	18.8961	1.63445	TEA/ATTS transcription factor; white cell pheromone response, hyphal gene regulation; required for Spider and RPMI biofilm formation; regulates BCR1; Cph2 regulated transcript; alkaline, rat catheter, Spider, flow model biofilm induced
	orf19.4941	TYE7	13.0876	21.3442	1.63434	bHLH transcription factor; control of glycolysis; required for biofilm formation; hyphally regulated by Cph1, Cyr1; flucytosine, Hog1 induced; amphotericin B, caspofungin repressed; induced in flow model biofilm and planktonic cultures
	orf19.2674	NA	11.6927	19.1454	1.63422	Putative transcription factor with zinc finger DNA-binding motif; Hap43p-repressed gene
	orf19.2612	NA	11.1703	18.3463	1.63397	C2H2 zinc finger transcription factor; expression reduced in ssr1 null mutant; flow model biofilm induced
	orf19.3474	IPL1	17.9351	29.2398	1.63093	Putative Aurora kinase; Hap43-induced; induced during planktonic growth; possibly an essential gene, disruptants not obtained by UAU1 method
	orf19.3751	NA	11.1253	18.0429	1.63072	Putative serine/threonine protein kinase; possibly an essential gene, disruptants not obtained by UAU1 method
	orf19.7044	RIM15	11.4002	18.3864	1.63044	Ortholog(s) have protein kinase activity and role in age-dependent response to oxidative stress involved in chronological cell aging, conidiophore development, hyphal growth, protein phosphorylation, regulation of meiosis
	orf19.7319	SUC1	14.8569	24.1002	1.62973	Zinc-finger transcription factor; regulates alpha-glucosidase exression; complements S. cerevisiae suc2 for sucrose utilization and mal13 maltase defect; required for yeast cell adherence to silicone substrate; rat catheter biofilm induced
	orf19.3302	NA	14.901	24.1569	1.62904	Putative type-1 protein phosphatase targeting subunit; transcript repressed by yeast-hyphal switch; transcript induced by Mnl1p under weak acid stress; flow model biofilm induced
	orf19.921	HMS1	15.7148	25.4602	1.62876	hLh domain Myc-type transcript factor; required for morphogenesis induced by elevated temperature or Hsp90 compromise; acts downstream of Pcl1; Spider biofilm induced
	orf19.2044	PGA27	13.466	21.6556	1.62827	Putative GPI-anchored protein
	orf19.1196	PKH3	11.0536	17.9871	1.62816	Ortholog(s) have protein kinase activity and role in MAPK cascade involved in cell wall biogenesis, protein phosphorylation
	orf19.390	CDC42	11.8063	19.1409	1.62762	Rho-type GTPase; required for budding and maintenance of hyphal growth; GGTase I geranylgeranylated; misexpression blocks hyphal growth, causes avirulence in mouse IV infection; shows actin-dependent localization to hyphal tip
	orf19.7402	DOT1	10.0481	15.8817	1.62646	Putative modulator of white-opaque switching
	orf19.4866	CPP1	13.271	21.4087	1.62568	VH1 family MAPK phosphatase; regulates Cst20-Hst7-Cek1-Cph1 filamentation pathway; represses yeast-hyphal switch; required for virulence in mice; yeast-enriched; induced by alpha pheromone in SpiderM medium; Spider biofilm induced
	orf19.2823	RFG1	12.9232	20.8622	1.62563	HMG domain transcriptional repressor of filamentous growth and hyphal genes; in Tup1-dependent and -independent pathways; binds DNA; transcript not regulated by oxygen or serum; not responsible for hypoxic repression; Spider biofilm induced
	orf19.7472	IFF4	14.6998	23.0445	1.62562	Adhesin-like cell surface protein; putative GPI-anchor; null mutant germ tubes show decreased adhesion to plastic substrate; mutants are viable; Hap43-repressed gene
	orf19.4206	NA	12.9203	21.0221	1.62559	Ortholog(s) have crossover junction endodeoxyribonuclease activity
	orf19.5855	MBP1	11.0337	17.8185	1.62314	Putative component of the MBF transcription complex involved in G1/S cell-cycle progression; non-periodic mRNA expression; predicted, conserved MBF binding sites upstream of G1/S-regulated genes
	orf19.2647	ZCF14	17.2145	27.8175	1.62275	Putative Zn(II)2Cys6 transcription factor; caspofungin induced
	orf19.3986	PPR1	11.4174	18.5238	1.62042	Putative transcription factor with zinc cluster DNA-binding motif; has similarity to S. cerevisiae Ppr1p, which is a transcription factor involved in the regulation of uracil biosynthesis genes
	orf19.2833	PGA34	13.3158	21.5753	1.62019	Putative GPI-anchored protein; transcript repressed by alpha pheromone in SpiderM medium; induced in oralpharyngeal candidasis; flow model biofilm induced; Spider biofilm induced
	orf19.5241	SNT1	9.5404	15.508	1.62014	Ortholog of S. cerevisiae Snt1; an NAD-independent histone deacetylase; heterozygous transposon mutation affects filamentous growth; null mutants are viable
	orf19.1069	RPN4	23.5619	37.6768	1.61966	C2H2 transcription factor; putative regulator of proteasome genes; DNA recognition sequence (GAAGGCAAAA) enriched in regions upstream of proteasome genes; induced in core stress response; Hap43-induced; Spider biofilm induced
	orf19.239	NA	12.7175	20.1964	1.6191	Putative ATP-dependent helicase; induced by nitric oxide
	orf19.5867	WSC1	12.2416	19.822	1.61717	Putative cell wall component; transcript upregulated in cyr1 mutant (yeast or hyphae); Spider and flow model biofilm induced
	orf19.191	KIC1	10.4524	16.6459	1.61631	Member of the GCK-III subfamily of eukaryotic Ste20p kinases; in RAM cell wall integrity signaling network; role in cell separation, azole sensitivity; required for hyphal growth; constitutive expression is MTL, white-opaque independent
	orf19.223	NA	10.8377	17.2692	1.61538	Putative serine/threonine protein kinase; Hap43-repressed; induced by prostaglandins; possibly an essential gene, disruptants not obtained by UAU1 method; flow model biofilm induced; Spider biofilm induced
	orf19.4242	CST20	10.8988	17.3614	1.61518	Protein kinase of Ste20p/p65PAK family, required for wild-type mating efficiency and virulence in a mouse model; Cst20p-Hst7p-Cek1p-Cph1p MAPK pathway regulates some hyphal growth; involved in Cdc42p growth regulation
	orf19.403	PCL2	12.4889	20.1191	1.61511	Cyclin homolog; reduced expression observed upon depletion of Cln3; farnesol regulated; periodic mRNA expression, peak at cell-cycle G1/S phase; Hap43-induced; rat catheter biofilm repressed
	orf19.1718	ZCF8	12.0526	19.1673	1.61337	Predicted Zn(II)2Cys6 transcription factor; repressed by fluphenazine treatment; required for yeast cell adherence to silicone substrate
	orf19.6995	ATO6	10.8697	17.3969	1.61296	Putative fungal-specific transmembrane protein
	orf19.2504	BMS1	10.8679	17.3818	1.61119	Putative GTPase; Hap43-induced gene; mutation confers resistance to 5-fluorocytosine (5-FC); flucytosine induced; repressed by prostaglandins; Spider biofilm induced
	orf19.2458	SIP5	14.4942	23.3826	1.61118	Protein of unknown function; flow model, rat catheter and Spider biofilm induced
	orf19.5940	ZCF32	13.3002	21.5995	1.61089	Predicted Zn(II)2Cys6 transcription factor; possibly an essential gene, disruptants not obtained by UAU1 method; Hap43-repressed
	orf19.20	RTS1	9.84252	15.7805	1.60968	Putative serine/threonine-protein phosphatase B-type regulatory subunit; transcription is regulated upon yeast-hyphal switch
	orf19.2534	PIN4	10.1958	16.4489	1.60955	Protein with similarity to S. cerevisiae Pin4p; transposon mutation affects filamentous growth
	orf19.535	RBR1	13.2209	20.3375	1.60935	Glycosylphosphatidylinositol (GPI)-anchored cell wall protein; required for filamentous growth at acidic pH; expression repressed by Rim101 and activated by Nrg1; Hap43-induced
	orf19.7617	NA	10.1967	16.3171	1.60809	Ortholog(s) have peptide alpha-N-acetyltransferase activity, role in N-terminal protein amino acid acetylation, histone acetylation and NatA complex, cytosol, cytosolic ribosome, nucleus localization
	orf19.4560	BFR1	13.1362	20.914	1.60718	Protein involved in the maintenance of normal ploidy; S. cerevisiae ortholog cofers Brefeldin A resistance; stationary phase enriched protein; Spider biofilm repressed
	orf19.5758	SAL6	15.2129	24.4097	1.60708	Putative protein phosphatase of the Type 1 family; serine/threonine-specific; similar to S. cerevisiae Ppq1; mutant has virulence defect; Spider biofilm induced
	orf19.5102	PLB5	14.6166	21.9802	1.60568	Putative GPI-linked phospholipase B, fungal-specific (no mammalian homolog); null mutation eliminates cell-associated phospholipase A2 activity and attenuates virulence; fluconazole-repressed; flow model biofilm repressed
	orf19.1446	CLB2	15.534	24.7774	1.60525	B-type mitotic cyclin (cyclin-dependent protein kinase regulatory subunit); essential; required for wild-type mitotic exit; role in cell polarization; interacts with catalytic subunit Cdk1; Spider biofilm repressed
	orf19.3764	GSG1	10.6705	17.1129	1.60445	Putative subunit of the TRAPP complex; involved in targeting of ER-to-Golgi transport vesicles; flow model biofilm induced
	orf19.3415	PTK2	12.2105	19.4898	1.60436	Putative protein kinase of polyamine import; mutation confers hypersensitivity to high concentrations of tunicamycin; YPD flow model biofilm induced; rat catheter and Spider biofilm induced
	orf19.3071	MIH1	10.559	16.792	1.60288	Putative protein phosphatase of the PTP family (tyrosine-specific); ortholog of S. cerevisiae Mih1; mRNA binds She3
	orf19.3093	MSH2	11.584	18.4068	1.60181	Putative DNA mismatch repair factor; transcript regulated by Nrg1; flucytosine repressed; transcript regulated by tyrosol and cell density
	orf19.3923	PGA37	14.1072	21.2962	1.60152	Putative GPI-anchored protein; Hap43-repressed; Spider biofilm induced
	orf19.1496	NA	17.3404	26.2177	1.60135	Putative transcription factor with zinc finger DNA-binding motif; Hap43p-repressed gene
	orf19.3506	DBR1	16.856	26.0758	1.60097	Debranchase; homozygous mutant accumulates lariat intermediates of mRNA splicing; rat catheter biofilm repressed
	orf19.5334	NA	12.1899	19.2595	1.59698	Ortholog od S. cerevisiae Tis11, a mRNA-binding protein; transcription regulated by yeast-hyphal switch; flow model biofilm induced; Spider biofilm repressed
	orf19.940	BUD2	11.8952	18.9179	1.59675	GTPase activating protein (GAP) for Rsr1; negative regulator of filament branching, acts in hyphal growth guidance; required for wild-type budding pattern; induced in low iron; regulated by tyrosol and cell density
	orf19.5350	NA	14.19	22.1965	1.5967	Ortholog(s) have cyclin-dependent protein serine/threonine kinase activity
	orf19.1814	STT4	12.4798	19.8665	1.59661	Putative phosphatidylinositol-4-kinase
	orf19.2969	RAD16	10.2661	16.2809	1.59548	Ortholog of S. cerevisiae Rad16; a protein that recognizes and binds damaged DNA; flucytosine induced; rat catheter and Spider biofilm induced
	orf19.7221	SET3	12.7882	20.3073	1.59546	NAD-dependent histone deacetylase; mutations affect filamentous growth; genetic evidence suggests Set3/Hos2 function as a complex to regulate white-opaque switching, morphogenesis, and virulence; flow model biofilm induced
	orf19.6568	SMC6	12.2545	19.1491	1.59535	Putative structural maintenance of chromosomes (SMC) protein; Hap43-induced; cell-cycle regulated periodic mRNA expression; S. cerevisiae ortholog not cell-cycle regulated; Spider biofilm induced
	orf19.1683	PPH21	11.4379	18.2535	1.59529	Putative protein phosphatase of the Type 2A-related family (serine/threonine-specific), similar to S. cerevisiae Pph21p; caspofungin repressed; possibly an essential gene, disruptants not obtained by UAU1 method
	orf19.147	YAK1	9.93723	15.8619	1.59407	Predicted serine-threonine protein kinase; involved in hyphal growth regulation and biofilm formation; flow model biofilm induced; induced in core caspofungin response
	orf19.4775	CTA8	11.539	18.2638	1.5938	Essential transcription factor, mediates heat shock transcriptional induction; in the absence of heat stress, Cta8p levels are modulated by growth temperature to regulate basal expression of genes involved in protein folding
	orf19.3969	SFL2	15.0902	23.8372	1.59337	Transcription factor involved in regulation of morphogenesis; required for filamentous growth, for virulence in RHE model but not in mice; induced upon RHE infection but C. dubliniensis ortholog is not; Spider biofilm induced
	orf19.175	NA	16.1792	25.6783	1.59286	Ortholog of C. dubliniensis CD36 : Cd36_27430, C. parapsilosis CDC317 : CPAR2_802450, Candida tenuis NRRL Y-1498 : CANTEDRAFT_113969 and Debaryomyces hansenii CBS767 : DEHA2A13002g
	orf19.3127	CZF1	18.1371	28.2369	1.59197	Transcription factor; regulates white-opaque switch; hyphal growth regulator; expression in S. cerevisiae causes dominant-negative inhibition of pheromone response; required for yeast cell adherence to silicone; Spider biofilm induced
	orf19.2108	SOD6	15.6114	23.525	1.59172	Copper- and zinc-containing superoxide dismutase; gene family includes SOD1, SOD4, SOD5, and SOD6; gene may contain an intron; Hap43-repressed; flow model and rat catheter biofilm induced
	orf19.4785	PTC1	18.7068	29.4356	1.59168	Putative protein phosphatase of the Type 2C-related family (serine/threonine-specific), similar to S. cerevisiae Ptc1p; mutant shows virulence defect
	orf19.878	NBN1	12.119	19.2758	1.59099	Subunit of the NuA4 histone acetyltransferase complex; Plc1p-regulated
	orf19.4766	ARG81	11.0225	17.3615	1.59022	Zn(II)2Cys6 transcription factor; required for utilization of ornithine as a nitrogen source and for wild-type resistance to caffeine; required for yeast cell adherence to silicone substrate
	orf19.3200	MTLA2	12.3112	19.5567	1.58973	Master regulator (activator) of a-type mating; has HMG domain, which is predicted to bind DNA; gene has intron; not related to S. cerevisiae MATa2; a/alpha mating type may increase virulence, provides competitive advantage
	orf19.5325	KIN3	17.0061	26.537	1.58856	Protein similar to S. cerevisiae Kin3p; induced under Cdc5p depletion; shows Mob2p-dependent hyphal regulation; mutants are hypersensitive to caspofungin
	orf19.1646	NA	13.3333	20.7785	1.58819	Ortholog(s) have rRNA primary transcript binding activity
	orf19.4166	ZCF21	14.7858	23.4422	1.58815	Predicted Zn(II)2Cys6 transcription factor; mutants display increased colonization of mouse kidneys; Spider biofilm induced
	orf19.2060	SOD5	12.49	19.8127	1.5878	Cu and Zn-containing superoxide dismutase; protects against oxidative stress; induced by neutrophils, hyphal growth, caspofungin, osmotic/oxidative stress; oralpharyngeal candidiasis induced; rat catheter and Spider biofilm induced
	orf19.2331	ADA2	14.6177	22.9971	1.58727	Zinc finger and homeodomain transcriptional coactivator; role in cell wall integrity and in sensitivity to caspofungin; required for the normal transcriptional response to caspofungin; required for yeast cell adherence to silicone substrate
	orf19.6034	NA	12.5063	19.7752	1.58718
	orf19.3683	AGE3	15.6857	24.7732	1.5867	Putative ADP-ribosylation factor GTPase activating protein, functional ortholog of S. cerevisiae GCS1; mutation affects endocytosis, hyphal growth, chemical and drug resistance, and sensitivity to cell wall inhibitors
	orf19.7644	NA	12.2589	19.2929	1.58635	Ortholog(s) have ubiquitin-protein ligase activity, role in anaphase-promoting complex-dependent proteasomal ubiquitin-dependent protein catabolic process, protein ubiquitination and anaphase-promoting complex localization
	orf19.5968	RDI1	11.6908	18.4937	1.5855	Putative rho GDP dissociation inhibitor; transposon mutation affects filamentous growth; farnesol, filament-induced; regulated by Nrg1, Tup1; protein levels low in stationary phase yeast
	orf19.5651	NA	15.6206	24.7613	1.58523	Ortholog(s) have histone demethylase activity (H3-dimethyl-K4 specific), histone demethylase activity (H3-trimethyl-K4 specific) activity
	orf19.7081	SPL1	17.1317	26.3092	1.58382	Protein similar to S. cerevisiae Spl1p, which is involved in tRNA splicing; member of pyridoxal-phosphate-dependent aminotransferase protein family; predicted to be essential
	orf19.4145	ZCF20	11.5679	18.2266	1.58142	Zn(II)2Cys6 transcription factor orthologous to S. cerevisiae Hap1; regulated by Sef1, Sfu1; Hap43-induced; Spider biofilm induced
	orf19.848	PGA16	12.0321	18.9472	1.57706	Putative GPI-anchored protein
	orf19.2843	RHO1	12.4973	19.4742	1.57481	Small GTPase of Rho family; regulates beta-1,3-glucan synthesis activity and binds Gsc1p; essential; expected to be geranylgeranylated by geranylgeranyltransferase type I; plasma membrane-localized
	orf19.3752	RAD51	10.9488	17.2091	1.57256	Protein involved in homologous recombination and DNA repair; flucytosine induced; slow growth and increased white-to-opaque switching frequency in null mutant
	orf19.6784	PGA32	14.6705	21.24	1.57249	Putative GPI-anchored adhesin-like protein; induced in high iron; Spider biofilm induced
	orf19.6222	SPO22	13.2178	20.6289	1.57228	Ortholog(s) have role in regulation of synaptonemal complex assembly and condensed nuclear chromosome localization
	orf19.4161	NA	12.728	19.2546	1.57132	Ortholog(s) have role in DNA repair and Smc5-Smc6 complex, nucleus localization
	orf19.7251	WSC4	15.6397	24.5413	1.56878	Putative cell wall integrity and stress response subunit 4 precursor; transcription is specific to white cell type
	orf19.1842	BUD5	13.6806	21.0588	1.56833	Predicted GTP/GDP exchange factor for Rsr1; rat catheter biofilm induced
	orf19.2395	IME2	16.2758	25.5445	1.56829	Putative serine/threonine protein kinase; mutation confers hypersensitivity to amphotericin B
	orf19.5844	NA	13.141	20.4883	1.56621	Ortholog(s) have role in meiotic DNA recombinase assembly, reciprocal meiotic recombination and condensed nuclear chromosome localization
	orf19.5357	AKL1	15.705	23.8602	1.56569	Putative serine/threonine protein kinase; induced during the mating process
	orf19.6645	HMO1	12.7998	19.9442	1.56544	HMG-box transcription factor; binds upstream of hexose and ergosterol metabolism and cell cycle genes; activates pseudohyphal growth when expressed in S. cerevisiae; repressed in hyphae; Spider biofilm repressed
	orf19.3523	CRK1	11.8645	18.5023	1.56485	Protein kinase of the Cdc2 subfamily involved in hyphal development, virulence; promotes hyphal development independently of Cph1 and Efg1; functionally complements pheromone hypersensitivity of S. cerevisiae sgv1 mutant; Hap43p-repressed
	orf19.5276	NA	11.6751	18.2567	1.56349	Putative nuclear pore-associated protein; Hap43p-induced gene; induced upon low-level peroxide stress; possibly an essential gene, disruptants not obtained by UAU1 method
	orf19.4796	NA	12.4511	19.3596	1.56332	Putative eIF-4E-binding repressor of CAP-dependent translation; stationary phase enriched protein
	orf19.7308	TUB1	12.4923	19.4199	1.56273	Alpha-tubulin; gene has intron; complements cold-sensitivity of S. cerevisiae tub1 mutant; C. albicans has single alpha-tubulin gene, whereas S. cerevisiae has two (TUB1, TUB3); farnesol-upregulated in biofilm; sumoylation target
	orf19.5224	PKH2	11.4627	17.919	1.56201	Putative serine/threonine protein kinase; predicted role in sphingolipid-mediated signaling pathway that controls endocytosis; mRNA binds She3 and is localized to hyphal tips
	orf19.1605	PMS1	11.9582	18.1773	1.56056	Putative DNA mismatch repair factor; ortholog of S. cerevisiae PMS1 which is an ATP-binding protein involved in DNA mismatch repair
	orf19.7510	KIN2	11.6254	18.0922	1.5605	Protein with similarity to S. cerevisiae Kin2p, transcription is positively regulated by Tbf1
	orf19.5026	NA	10.4687	16.2918	1.55919	C2H2 transcription factor; Spider biofilm induced
	orf19.1135	CAS1	11.0924	17.0793	1.55892	Putative transcription factor with Ku70/Ku80 beta-barrel DNA-binding motif; involved in telomerase regulation and telomere protection; mutation causes marginal increase in caspofungin sensitivity
	orf19.4909	CBK1	14.3719	22.1105	1.55811	Ser/Thr kinase of cell wall integrity pathway; mutants show abnormal morphology and aggregation; Mob2p associated; required for wild-type hyphal growth and transcriptional regulation of cell-wall-associated genes
	orf19.4450	ZCF23	17.4907	26.5587	1.55564	Predicted Zn(II)2Cys6 transcription factor; ortholog of S. cerevisiae Gsm1; flow model biofilm induced
	orf19.1035	WAR1	10.7912	16.5553	1.55353	Zn(II)2Cys6 transcription factor; plays a role in resistance to weak organic acids; required for yeast cell adherence to silicone substrate; Spider biofilm induced
	orf19.3012	ARO80	11.7297	17.9814	1.55315	Zn(II)2Cys6 transcription factor; transcriptional activator of aromatic amino acid catabolism; regulator of aromatic alcohol biosynthesis via the Ehrlich pathway; mutant is viable
	orf19.5660	NA	12.1136	18.6029	1.55227	Ortholog(s) have ubiquitin-protein ligase activity, role in protein import into peroxisome matrix, protein ubiquitination and endoplasmic reticulum, peroxisomal membrane localization
	orf19.2728	NA	12.1029	18.6083	1.55203	Ortholog(s) have DNA clamp loader activity, role in DNA damage checkpoint, nucleotide-excision repair, reciprocal meiotic recombination and Rad17 RFC-like complex, nucleus localization
	orf19.1971	TRY3	16.258	24.8882	1.55202	RING-finger transcription factor; regulator of yeast form adherence; required for yeast cell adherence to silicone substrate; Spider biofilm induced
	orf19.1574	NA	11.4627	17.7358	1.55147	Putative TFIID subunit involved in RNA polymerase II transcription initiation; possibly an essential gene, disruptants not obtained by UAU1 method
	orf19.4225	LEU3	11.489	17.6992	1.55101	Zn(II)2Cys6 transcription factor; predicted regulator branched-c ofhain amino acid biosynthesis genes; alkaline induced; induced by Mnl1 under weak acid stress; required for yeast cell adherence to silicone substrate; Spider biofilm induced
	orf19.6133	PIF1	17.1176	26.4947	1.55042	Putative DNA helicase; decreased transcription is observed upon fluphenazine treatment
	orf19.7547	NA	11.9746	18.5128	1.5499	Ortholog(s) have phosphatidylinositol-3-phosphate binding, ubiquitin-protein ligase activity, role in protein ubiquitination and cytosol, fungal-type vacuole membrane, late endosome, nucleus localization
	orf19.6010	CDC5	17.1802	25.9844	1.54929	Polo-like kinase; member of conserved Mcm1 regulon; depletion causes defects in spindle elongation and Cdc35-dependent filamentation; virulence-group-correlated expression; likely essential (UAU1 method); Spider biofilm repressed
	orf19.4778	LYS142	15.9671	24.2355	1.54929	Zn(II)2Cys6 transcription factor; has similarity to S. cerevisiae Lys14, involved in the regulation of lysine biosynthesis genes; fungal-specific
	orf19.642	NA	12.1318	18.0373	1.54759	Ortholog of C. dubliniensis CD36 : Cd36_30470, C. parapsilosis CDC317 : CPAR2_203380, Candida tenuis NRRL Y-1498 : CANTEDRAFT_117493 and Debaryomyces hansenii CBS767 : DEHA2G19228g
	orf19.1949	VPS1	17.3324	26.4828	1.54722	Dynamin-family GTPase-related protein; induced upon adherence to polystyrene; regulated by Gcn2p and Gcn4p
	orf19.3551	DAD2	11.189	17.2829	1.54706	Essential subunit of the Dam1 (DASH) complex, which acts in chromosome segregation by coupling kinetochores to spindle microtubules
	orf19.1826	MDM34	18.7273	28.6299	1.54615	Putative zinc finger transcription factor; macrophage-downregulated; flow model biofilm induced; flow model and Spider biofilm induced
	orf19.5200	SIT4	12.9016	19.2835	1.54584	Serine/threonine protein phosphatase catalytic subunit; has a role in cell wall maintenance, hyphal growth, and virulence in a mouse systemic infection model
	orf19.3947	NA	13.7686	20.7866	1.54497	Ortholog(s) have rDNA binding activity
	orf19.1792	NA	12.7604	19.7033	1.54485	Ortholog(s) have ubiquitin-protein ligase activity
	orf19.71	NA	13.0408	19.1117	1.54397	Ortholog(s) have role in ER to Golgi vesicle-mediated transport, protein secretion and COPII vesicle coat, Golgi membrane, cell division site, cell tip, cis-Golgi network, cytosol, nucleus localization
	orf19.5175	NA	11.917	18.2884	1.54359	Ortholog(s) have ubiquitin-protein ligase activity, role in ER-associated ubiquitin-dependent protein catabolic process and Doa10p ubiquitin ligase complex, integral to endoplasmic reticulum membrane, nuclear inner membrane localization
	orf19.3425	NA	16.3212	24.5788	1.54317	RING/FYVE/PHD zinc finger protein; Spider biofilm induced
	orf19.6124	ACE2	12.0439	18.2531	1.54314	Transcription factor; similar to S. cerevisiae Ace2 and Swi5; regulates morphogenesis, cell separation, adherence, virulence in a mice; mutant is hyperfilamentous; rat catheter and Spider biofilm induced
	orf19.3001	TEM1	12.2017	18.848	1.54302	Putative GTPase involved in mitotic exit and cytokinesis; induced under Cdc5p depletion
	orf19.2519	NA	12.3167	18.9653	1.54148	Ortholog(s) have role in chromosome segregation and nuclear MIS12/MIND complex localization
	orf19.7150	NRG1	12.5776	19.1363	1.54037	Transcription factor/repressor; regulates chlamydospore formation/hyphal gene induction/virulence and rescue/stress response genes; effects both Tup1 dependent and independent regulation; flow model biofilm induced; Spider biofilm repressed
	orf19.1989	DCW1	14.5183	22.2632	1.53801	Protein with predicted GPI modification; dfg5 dcw1 double mutant is inviable; not required for wild-type hyphal growth; upregulated in cyr1 mutant (yeast or hyphal form); Hap43-induced
	orf19.1401	EAP1	16.6524	25.6021	1.53683	GPI-anchored cell wall adhesin; Efg1-regulated; mutant suppresses cell adhesion, filamentation, invasive growth defects of S. cerevisiae flo8 or flo11 mutant; biofilm induced; required for biofilm formation; Bcr1-repressed in a/a biofilms
	orf19.1943	NA	11.926	18.2356	1.53622	Ortholog of C. parapsilosis CDC317 : CPAR2_302610, C. dubliniensis CD36 : Cd36_51070, Candida orthopsilosis Co 90-125 : CORT_0E04770 and Spathaspora passalidarum NRRL Y-27907 : SPAPADRAFT_50634
	orf19.5157	NA	12.612	19.3132	1.53573	Protein with a protein tyrosine phosphatase-like protein domain; putative membrane-spanning regions; rat catheter biofilm induced
	orf19.59	REI1	16.4755	25.211	1.53555	Putative cytoplasmic pre-60S factor; Hap43-induced; repressed by prostaglandins
	orf19.6437	NA	12.0049	18.3055	1.53496
	orf19.428	NA	18.238	26.4032	1.53467	Putative serine/threonine kinase; induced during planktonic growth; rat catheter biofilm repressed
	orf19.3715	ASF1	10.192	15.4305	1.53265	Protein similar to S. cerevisiae Asf1p, a chromatin assembly complex component; likely to be essential for growth, based on an insertional mutagenesis strategy
	orf19.4623.3	NHP6A	12.5257	19.1515	1.52857	Putative non-histone chromatin component; RNA abundance regulated by tyrosol,cell density; Hap43-induced; amphotericin B, caspofungin repressed; 5'-UTR intron; rat catheter and Spider biofilm repressed
	orf19.3088	NA	13.8535	20.8572	1.52761	bZIP transcription factor; possibly transcriptionally regulated upon hyphal formation; Hap43; F-12/CO2 early biofilm induced; Spider biofilm induced
	orf19.7372	MRR1	9.81669	14.9506	1.5276	Putative Zn(II)2Cys6 transcription factor; regulator of MDR1 transcription; gain-of-function mutations cause upregulation of MDR1 (a plasma membrane multidrug efflux pump) and multidrug resistance; Hap43-induced
	orf19.3957	NA	12.4042	18.8026	1.52634	Ortholog(s) have GTP cyclohydrolase I activity, role in folic acid-containing compound biosynthetic process and cytosol, nucleus localization
	orf19.233.1	HRT1	13.1166	20.0861	1.52605	Ortholog of S. cerevisiae Hrt1; component of a nuclear ubiquitin-protein ligase complex involved in cell cycle control; induced by hydroxyurea; Spider biofilm induced
	orf19.4297	CKB2	11.6148	17.7201	1.5252	Regulatory subunit of protein kinase CK2 (casein kinase II), beta' subunit; null mutants are hypersensitive to caspofungin
	orf19.1499	CTF1	10.4422	15.871	1.5221	Putative zinc-finger transcription factor, similar to A. nidulans FarA and FarB; activates genes required for fatty acid degradation; induced by oleate; null mutant displays carbon source utilization defects and slightly reduced virulence
	orf19.6680	FGR27	12.3705	17.9839	1.52167	Zn(II)2Cys6 transcription factor; transposon mutation affects filamentous growth; required for yeast cell adherence to silicone substrate; Spider biofilm induced
	orf19.6537	NA	11.3643	17.1791	1.51894	Ortholog(s) have role in chromosome segregation and nuclear MIS12/MIND complex, spindle pole localization
	orf19.6142	NA	13.4795	19.6319	1.51643	Ortholog(s) have double-stranded DNA binding activity, role in reciprocal meiotic recombination and condensed nuclear chromosome localization
	orf19.1474	SLA1	13.0126	19.6687	1.51488	Protein required for assembly of the cortical actin cytoskeleton; contains three SH3 domains; transcription is regulated by Nrg1 and Mig1; flow model biofilm repressed
	orf19.2033	PGA19	12.6971	19.3657	1.5146	Putative GPI-anchored protein; macrophage-induced gene; mutants are viable
	orf19.3153	MSS4	16.7188	25.1203	1.51435	Phosphatidylinositol-4-phosphate 5-kinase; activity induced by phosphatidic acid (Pld1 product); macrophage/pseudohyphal-repressed; mRNA binds to She3, localized to yeast cell buds and hyphal tips; Hap43-induced; Spider biofilm induced
	orf19.3740	PGA23	13.4297	19.8119	1.51376	Putative GPI-anchored protein of unknown function; Rim101-repressed; Cyr1-regulated; colony morphology-related gene regulation by Ssn6
	orf19.2922	NA	17.1692	25.9893	1.51364	Ortholog(s) have double-stranded DNA binding activity, role in reciprocal meiotic recombination, synapsis and condensed nuclear chromosome localization
	orf19.2771	BEM3	10.7152	16.1597	1.5136	Putative GTPase-activating protein (GAP) for Rho-type GTPase Cdc42p; involved in cell signaling pathways that control cell polarity; similar to S. cerevisiae Bem3p
	orf19.4722	RTG1	12.6114	19.0632	1.50943	Ortholog(s) have sequence-specific DNA binding RNA polymerase II transcription factor activity
	orf19.1648	RAD50	10.0391	15.0435	1.50801	Putative DNA double-strand break repair factor; involved in response to oxidative stress and drug resistance; flow model biofilm repressed
	orf19.1901	MCM3	10.4946	15.3283	1.50578	Putative DNA replication protein; periodic mRNA expression, peak at cell-cycle M/G1 phase; Spider biofilm induced
	orf19.6109	TUP1	17.074	24.6889	1.50543	Transcriptional corepressor; represses filamentous growth; regulates switching; role in germ tube induction, farnesol response; in repression pathways with Nrg1, Rfg1; farnesol upregulated in biofilm; rat catheter, Spider biofilm repressed
	orf19.4185	NA	11.9325	17.81	1.50382	Ortholog(s) have phosphoprotein phosphatase activity, thiosulfate sulfurtransferase activity, role in DNA-dependent DNA replication, protein dephosphorylation, regulation of DNA-dependent DNA replication and cytosol, nucleus localization
	orf19.1815	NA	14.6482	20.5915	1.49951	Ortholog of S. cerevisae/S. pombe Tif6; constituent of 66S pre-ribosomal particles; Spider biofilm induced
	orf19.844	STE11	11.7599	17.2267	1.49933	Protein similar to S. cerevisiae Ste11p; mutants are sensitive to growth on H2O2 medium
	orf19.7035	NA	11.6273	17.1696	1.49781
	orf19.7017	YOX1	13.2851	19.7546	1.4976	Putative homeodomain-containing transcription factor; transcriptional repressor; periodic mRNA expression, peak at cell-cycle G1/S phase
	orf19.2961	NA	20.127	29.655	1.4958	Putative transcription factor with zinc finger DNA-binding motif
	orf19.2781	NA	11.0434	16.3633	1.49528	Protein with predicted serine/threonine kinase and tyrosine kinase domains; possibly an essential gene, disruptants not obtained by UAU1 method; Spider biofilm induced
	orf19.4649	ZCF27	11.8082	17.5872	1.49398	Putative Zn(II)2Cys6 transcription factor
	orf19.5438	NA	15.8247	23.2897	1.49306	Putative ubiquitin-protein ligase; role in protein sumoylation, protein ubiquitination; Spider biofilm induced
	orf19.3264	CCE1	13.0534	19.1164	1.49188	Putative Holliday junction resolving enzyme; similar to S. cerevisiae Cce1p
	orf19.3456	NA	19.2138	28.3867	1.48979	Protein with a predicted serine/threonine kinase and tyrosine kinase domain; possibly an essential gene, disruptants not obtained by UAU1 method
	orf19.7250	NA	12.3005	18.1542	1.48911	Protein of unknown function; rat catheter and Spider biofilm induced
	orf19.2417	SMC5	11.5589	17.0434	1.48872	Protein similar to S. cerevisiae Smc5p, which is involved in DNA repair; transposon mutation affects filamentous growth
	orf19.6933	NA	12.4069	18.4212	1.48804	Ortholog(s) have peptidyl-prolyl cis-trans isomerase activity, protein phosphatase type 2A regulator activity
	orf19.967	NA	12.4209	18.3849	1.48776	Major mitochondrial nuclease; has RNAse and DNA endo- and exonucleolytic activities; roles in mitochondrial recombination, apoptosis and maintenance of polyploidy; Spider biofilm repressed
	orf19.5265	KIP4	11.1166	16.2907	1.48607	S. cerevisiae Smy1 ortholog; Tn mutation affects filamentous growth; filament induced; has Mob2-dependent hyphal regulation; regulated by Nrg1, Tup1; oralpharyngeal candidasis induced; Spider biofilm induced; flow model biofilm repressed
	orf19.1762	OCA1	13.1336	19.3834	1.48528	Putative protein phosphatase of the PTP family (tyrosine-specific); ortholog of S. cerevisiae Oca1; mutant is viable; mutant shows virulence defect
	orf19.1911	PGA52	14.6163	21.7381	1.48315	GPI-anchored cell surface protein of unknown function; Hap43p-repressed gene; fluconazole-induced; possibly an essential gene, disruptants not obtained by UAU1 method
	orf19.4765	PGA6	14.7136	21.5949	1.48311	GPI-anchored cell wall adhesin-like protein; induced by high iron; upregulated upon Als2 depletion; mRNA binds She3 and is localized to hyphal tips; Spider biofilm repressed
	orf19.6551.1	STE18	13.7994	20.4909	1.48235	Protein similar to S. cerevisiae Ste18p; expressed in opaque or white MTLa/MTLa or MTLalpha/MTLalpha, but not MTLa/MTLalpha cells; MTLa1p, MTLalpha2p bind promoter region
	orf19.2356	CRZ2	18.7424	27.1563	1.47984	C2H2 transcription factor; crz1 not crz2 null mutation suppresses fluconazole resistance of homozygous cka2 null; Rim101-repressed at pH 8; required for yeast cell adherence to silicone substrate; Spider biofilm induced
	orf19.3794	CSR1	17.4778	25.7813	1.47629	Transcription factor; role in zinc homeostasis and regulation of Spider biofilm matrix; mutation affects filamentous growth; can suppress S. cerevisiae rok1 mutant inviability; Spider biofilm induced; mutants for abnormal Spider biofilms
	orf19.1623	CAP1	17.2601	25.4608	1.47551	AP-1 bZIP transcription factor; apoptotic, oxidative stress response/resistance, multidrug resistance; nuclear in oxidative stress; complements S. cerevisiae yap1 mutant; oralpharyngeal candidasis-, human neutrophil, Spider biofilm induced
	orf19.5032	SIM1	15.8007	22.1351	1.47356	Adhesin-like protein; involved in cell wall maintenance, redundant with Sun41; possibly secreted; macrophage-repressed; repressed by Rim101, Cyr1, Ras1; Spider biofilm induced
	orf19.4284	NA	13.0572	18.35	1.46934
	orf19.2765	PGA62	14.7975	21.4903	1.46845	Adhesin-like cell wall protein; putative GPI-anchor; fluconazole-induced; induced in high iron; induced during cell wall regeneration; Cyr1 or Ras1 repressed; Tbf1 induced
	orf19.5389	FKH2	17.763	25.3716	1.46572	Forkhead transcription factor; morphogenesis regulator; required for wild-type hyphal transcription, cell separation, and for virulence in cell culture; mutant lacks true hyphae, is constitutively pseudohyphal; upregulated in RHE model
	orf19.6610	NA	12.71	17.869	1.4613	Ortholog(s) have microtubule plus-end binding, structural constituent of cytoskeleton activity
	orf19.4549	FGR38	12.1332	17.2217	1.46121	Protein lacking an ortholog in S. cerevisiae; member of a family of related proteins; transposon mutation affects filamentous growth; macrophage-induced gene; Hap43p-repressed gene
	orf19.4593	RGA2	12.7462	18.0544	1.45901	Putative GTPase-activating protein (GAP) for Rho-type GTPase Cdc42; involved in cell signaling pathways controlling cell polarity; induced by low-level peroxide stress; flow model biofilm induced
	orf19.3434	TRY5	13.265	18.2726	1.45545	Zn(II)2Cys6 transcription factor; regulator of yeast form adherence; required for yeast cell adherence to silicone substrate
	orf19.1259	NA	12.5328	17.9191	1.45433	Ortholog(s) have DNA binding, ubiquitin-protein ligase activity and role in histone catabolic process, histone ubiquitination, regulation of transcription from RNA polymerase II promoter in response to oxidative stress
	orf19.4162	MLH1	11.9956	17.0442	1.45268	Putative mismatch repair protein; cell-cycle regulated periodic mRNA expression
	orf19.3252	DAL81	11.6837	16.399	1.45053	Zn(II)2Cys6 transcription factor; ortholog of S. cerevisiae Dal81, involved in the regulation of nitrogen-degradation genes; required for yeast cell adherence to silicone substrate; Spider biofilm induced
	orf19.3305	ZCF17	12.7831	17.8364	1.45018	Putative Zn(II)2Cys6 transcription factor
	orf19.5160	NA	12.7451	17.5764	1.44896	Ortholog(s) have role in G1/S transition of mitotic cell cycle, TOR signaling cascade, dephosphorylation, regulation of mitotic sister chromatid segregation, tRNA wobble uridine modification
	orf19.5635	PGA7	14.233	20.1527	1.44468	GPI-linked hyphal surface antigen; induced by ciclopirox olamine, ketoconazole, Rim101 at pH 8; Hap43, fluconazole; flow model biofilm induced; Spider biofilm induced; required for RPMI biofilm; Bcr1-induced in a/a biofilm
	orf19.6285	GLC7	12.1996	17.5029	1.43986	Putative catalytic subunit of type 1 serine/threonine protein phosphatase; regulated by Shp1; induced in high iron; alternatively spliced intron in 5' UTR
	orf19.5498	EFH1	15.9828	22.6941	1.43264	APSES transcription factor; homodimer; minor role in transcriptional regulation vs Efg1; regulates filamentous growth, phenotypic switch; EFG1 and EFH1 genetically interact; expression interferes with mouse intestinal tract colonization
	orf19.3978	NA	14.8404	19.0819	1.43132	Protein required for maturation of 18S rRNA; rat catheter biofilm repressed
	orf19.7625	PGA1	13.9744	19.6381	1.43062	Putative GPI-anchored protein; induced during cell wall regeneration; required for normal adhesion to host cells and for adherence during Sabouraud biofilm formation; Spider biofilm induced
	orf19.2649	PCL1	13.0068	18.6251	1.42829	Cyclin homolog; transcript induced by filamentous growth; induced by alpha pheromone in SpiderM medium
	orf19.4776	LYS143	12.4007	16.2841	1.42047	Zn(II)2Cys6 transcription factor; ortholog of S. cerevisiae Lys14 involved in the regulation of lysine biosynthesis genes
	orf19.2097	NA	10.7192	15.1194	1.4166	Predicted DNA-dependent ATPase/helicase; Spider biofilm induced
	orf19.6753	NA	11.769	16.6612	1.41517	Protein with a predicted RING-type zinc finger; possibly an essential gene, disruptants not obtained by UAU1 method
	orf19.4890	CLA4	14.3601	19.5578	1.41376	Ste20p family Ser/Thr kinase required for wild-type filamentous growth, organ colonization and virulence in mouse systemic infection; role in chlamydospore formation; functional homolog of S. cerevisiae Cla4p; mutant caspofungin sensitive
	orf19.4670	CAS5	15.1546	19.0775	1.41362	Transcription factor; cell wall damage response; required for adherence, response/resistance to caspofungin; repressed in core stress response; mutants have reduced CFU in mice, hyphal defect in C. elegans infection; Spider biofilm induced
	orf19.6817	FCR1	17.1336	23.9637	1.41355	Transcription factor; repressor of fluconazole/ketoconazole/brefeldin A resistance; Tn mutation enhances filamentation; partially rescues S. cerevisiae pdr1 pdr3 fluconazole sensitivity; rat catheter biofilm induced/Spider biofilm repressed
	orf19.4427	SKP1	12.0927	17.0733	1.41334	Putative subunit D of kinetochore protein complex CBF3; regulated by Gcn4p; repressed in response to amino acid starvation (3-aminotriazole treatment)
	orf19.1150	NA	19.0521	25.8656	1.40984	GATA-like transcription factor; oral infection induced; mutant has reduced capacity to damage oral epithelial cells; regulated by Gcn2 and Gcn4; Spider biofilm induced
	orf19.173	NA	12.8435	17.5866	1.404	C2H2 transcription factor; induced by Mnl1 under weak acid stress
	orf19.1729	NA	12.8378	17.868	1.40226	Putative transcription factor with zinc finger DNA-binding motif
	orf19.2432	HAC1	15.2568	21.1671	1.40153	bZIP transcription factor; role in unfolded protein response and control of morphology; transcript undergoes atypical splicing at C terminus under ER stress; induced during mating and by caspofungin; mRNA binds She3; Spider biofilm induced
	orf19.3010.1	ECM33	17.3447	21.8813	1.4004	GPI-anchored cell wall protein; mutants show cell-wall defects and reduced adhesion, host cell damage, and endocytosis; mutant infection is immunoprotective in murine model; fluconazole-induced; caspofungin repressed
	orf19.5326	NA	12.0524	16.7624	1.40031	Putative transcription factor with zinc finger DNA-binding motif; possible ortholog of S. cerevisiae Mig2p
	orf19.4308	HSL1	12.1501	16.6366	1.39967	Probable protein kinase involved in determination of morphology during the cell cycle of both yeast-form and hyphal cells via regulation of Swe1p and Cdc28p; required for full virulence and kidney colonization in mouse systemic infection
	orf19.2267	RFA2	13.0125	18.0478	1.39131	Putative DNA replication factor A; RNA abundance regulated by cell cycle, tyrosol and cell density
	orf19.570	IFF8	15.8429	20.3308	1.3906	Putative GPI-anchored adhesin-like protein; decreased transcription is observed in an azole-resistant strain that overexpresses MDR1
	orf19.3613	NA	12.9648	18.0148	1.38824	Ortholog(s) have RNA polymerase II core binding, RNA polymerase II core promoter sequence-specific DNA binding transcription factor activity, TFIIF-class binding transcription factor activity, chromatin binding activity
	orf19.7417	TSA1	14.7853	18.3778	1.38661	TSA/alkyl hydroperoxide peroxidase C (AhPC) family protein; similar to thiol-dependent peroxidases of oxidative stress signaling; antigenic; hyphal surface, nucleus; yeast-form nucleus, cytoplasm; biofilm, phagocytosis, peroxide induced
	orf19.166	ASG1	11.7888	16.302	1.38517	Gal4p family zinc-finger transcription factor with similarity to S. cerevisiae Asg1p
	orf19.5764	SKI8	13.9538	17.5474	1.37862	Ortholog(s) have role in nuclear-transcribed mRNA catabolic process, 3'-5' exonucleolytic nonsense-mediated decay, nuclear-transcribed mRNA catabolic process, non-stop decay and protein complex assembly, more
	orf19.5674	PGA10	16.7266	22.3291	1.37572	GPI anchored membrane protein; utilization of hemin and hemoglobin for Fe in host; Rim101 at ph8/hypoxia/ketoconazole/ciclopirox/hypha-induced; required for RPMI biofilm formation, Bcr1-induced in a/a biofilm; rat catheter biofilm repressed
	orf19.718	RRN11	20.977	28.3333	1.36309	Putative RNA polymerase I subunit; rat catheter biofilm induced; Spider biofilm induced
	orf19.7114	CSA1	16.2689	22.1213	1.35898	Surface antigen on elongating hyphae and buds; strain variation in repeat number; ciclopirox, filament induced, alkaline induced by Rim101; Efg1-, Cph1, Hap43-regulated; required for WT RPMI biofilm formation; Bcr1-induced in a/a biofilms
	orf19.4192	CDC14	21.936	29.6356	1.35214	Protein involved in exit from mitosis and morphogenesis; ortholog of S. cerevisiae Cdc14p, which is a dual-specificity phosphatase and cell-cycle regulator; suppresses S. cerevisiae cdc15-lyt1, dbf2-2, and (partially) tem1 mutant phenotypes
	orf19.576	CTF8	14.7473	19.4439	1.34669	Putative kinetochore protein with a predicted role in sister chromatid cohesion; repressed during the mating process; flow model biofilm induced
	orf19.6997	ATO5	14.988	18.0015	1.33817	Putative fungal-specific transmembrane protein
	orf19.5303	PGA30	14.7245	19.4289	1.33792	GPI-anchored protein of cell wall
	orf19.5423	EST3	14.6763	18.8738	1.33295	Telomerase subunit; required for telomere maintenance in vivo; separable roles in telomerase activity and processivity; not required for catalytic activity in vitro; related to mammalian Tpp1p
	orf19.6081	PHR2	15.2347	19.656	1.32739	Glycosidase; role in vaginal not systemic infection (low pH not neutral); low pH, high iron, fluconazole, Hap43-induced; Rim101-repressed at pH8; rat catheter biofilm induced; Bcr1-repressed in RPMI a/a biofilms
	orf19.3199	PIKA	13.7621	17.5595	1.32358	Putative phosphatidylinositol kinase; non-sex gene located within the MTLa mating-type-like locus
	orf19.3294	MBF1	13.474	17.6089	1.31457	Putative transcriptional coactivator; caspofungin repressed
	orf19.1759	PHO23	18.9134	24.3357	1.31017	Ortholog(s) have methylated histone residue binding activity
	orf19.4377	KRE1	16.4846	20.0076	1.28419	Cell wall glycoprotein; beta glucan synthesis; increases glucan content in S. cerevisiae kre1, complements killer toxin sensitivity; caspofungin induced; Spider/rat catheter/flow model biofilm induced; Bcr1-repressed in RPMI a/a biofilms
	orf19.4473	NA	55.6585	67.6025	1.23947
	orf19.7652	CKA1	17.2802	19.6964	1.22997	Putative alpha subunit (catalytic subunit) of protein kinase CK2; Cka1p and Cka2p have a common target with respect to fluconazole resistance; synthetically lethal with CKA2; flucytosine induced
	orf19.6926	CSC25	13.3128	15.7557	1.19906	Guanyl-nucleotide exchange factor; activator of Ras/adenylyl cyclase pathway; functional homolog of S. cerevisiae Cdc25p; commonly called Cdc25; transposon mutation affects filamentous growth
	orf19.3589	SPO11	14.0503	16.8222	1.19869	DNA endonuclease; required for genetic recombination between homologous chromosomes during the parasexual cycle; produced in mitotically dividing cells; similar to S. cerevisiae Spo11 which functions in recombination during meiosis
	orf19.7473	NA	53.5937	63.6546	1.17797	Ortholog(s) have role in endocytosis and actin cortical patch, cellular bud neck, cytoplasm localization
	orf19.7208	CSK1	65.3663	34.0786	0.5231	Putative mitogen-activated protein (MAP) kinase with an unknown role; null mutant produces wrinkled colonies; similar to S. cerevisiae Smk1p, which is a protein kinase required for sporulation

## Sheet: Top hits
				Relative growth (% GC)1		Fold changes
		orf n°	Gene name	D-F+2	D+F+	(D+F+)/(D-/F+)	Category
	Top 10 strains with increased tolerance	orf19.2842	GZF3	12.4425	26.3471	2.14425	Transcription factor
		orf19.4401	YVH1	9.66662	19.8169	2.05189	Protein phosphatase
		orf19.2538	PTC2	12.7548	25.425	2.01979	Protein phosphatase
		orf19.7001	YCK2	14.0341	28.2371	2.00768	Protein kinase
		orf19.3356	ESP1	11.319	22.3404	1.9742	DNA replication/recombination/repair
		orf19.5144	PGA28	11.6106	22.8729	1.96518	Cell wall genes
		orf19.6792	RRD1	13.1735	25.834	1.95795	Protein phosphatase
		orf19.799	STE4	13.0553	25.4163	1.95313	Other signaling comp
		orf19.5636	RBT5	10.3613	20.0897	1.94334	Cell wall genes
		orf19.5257	LCB4	14.5716	27.5796	1.93985	Various
	10 strains ranking last in the TI screen	orf19.3199	PIKA	13.7621	17.5595	1.32358	Various
		orf19.3294	MBF1	13.474	17.6089	1.31457	Transcription factor
		orf19.1759	PHO23	18.9134	24.3357	1.31017	Transcription factor
		orf19.4377	KRE1	16.4846	20.0076	1.28419	Cell wall genes
		orf19.4473	NA3	55.6585	67.6025	1.23947	Uncharacterized
		orf19.7652	CKA1	17.2802	19.6964	1.22997	Protein kinase
		orf19.6926	CSC25	13.3128	15.7557	1.19906	Protein kinase
		orf19.3589	SPO11	14.0503	16.8222	1.19869	DNA replication/recombination/repair
		orf19.7473	NA	53.5937	63.6546	1.17797	DNA replication/recombination/repair
		orf19.7208	CSK1	65.3663	34.0786	0.5231	Protein kinase
	1 % of the drug free growth control								Fold changes
	2 D = Doxycycline, F = Fluconazole, +/- = presence/absence of the drug								0	0.1	0.2	0.3	0.4	0.5	0.6	0.7	0.8	0.9	1	1.1	1.2	1.3	1.4	1.5	1.6	1.7	1.8	1.9	2
	3 NA = Not Available
